# Supplementary material for: Gene regulatory network reconstruction using single-cell RNA sequencing of barcoded genotypes in diverse environments
Source: eLife. 2020 Jan 27;9:e51254. doi: 10.7554/eLife.51254 (PMC7004572; doi:10.7554/eLife.51254)
Supplement: Supplementary file 1. — Supplemental Table 1 contains all primer sequences used in this work. Supplemental Table 2 contains all Saccharomyces cerevisiae strains used in this work. Supplemental Table 3 contains all plasmids used in this work. Supplemental Table 4 contains all media formulations used in this work. Supplemental Table 5 contains the source data for modeling performance (as AUPR) that is reported graphically in Figure 5. Supplemental Table 6 contains the gene categorizations (cell cycle stage, RP, RiBi, etc) used in Figure 3. [file elife-51254-supp1.xlsx]

## Sheet: Supplemental Table 1 - Primers
Purpose	Primer ID	Name	Sequence	Notes
Construct DGP304	1628	KAN_FWD	ttgtaaaacgacggccagtgcccggggacatggaggcccagaatac	Amplifies pTEF::KAN from pUG6
	1629	KAN_REV	tctagaccagtcttctcgaagacacggatccttagaaaaactcatcgagcatcaaatg	Amplifies pTEF::KAN from pUG6
	1630	tTEF_FWD	ttcgagaagactggtctagaactgacaataaaaagattcttgttttc	Amplifies tTEF from pUG6
	1659	tTEF_REV_2	caagcttgcatgcctgcaggcccgggatcgacagcagtatagcgaccagc	Amplifies tTEF from pUG6
	1641	pUC_LEFT	cactggccgtcgttttacaa	Amplifies pUC19
	1642	pUC_RIGHT	cctgcaggcatgcaagcttg	Amplifies pUC19
Construct DGP306	1751	BC_GFP_F	gctcgatgagtttttctaaggatccgtgtcttcgaaagtgaaacgtgatttc	Amplifies GFP from pWS158
	1752	BC_GFP_R	gaatctttttattgtcagttctagacacgtcttctataaacgcagaaaggcc	Amplifies GFP from pWS158
Construct Barcode	1738	BARCODE_2	GTAAAACGACGGCCAGTgaagacgtatccaNNgNNgtNNgNNgtNNgNNgtctgtgtcttcGTCATAGCTGTTTCCTG	Degenerate Barcode Oligo
	1671	M13R-17	CAGGAAACAGCTATGAC	Double-Stranding Barcode Oligo
Genomic Geletion Primers: FWD & REV Contain Homology Arms, C & D Are Confirmation Primers	1702	RTG1_FWD	AAAACACTAGATAGTGAACCAAAAGAAAGCACAACACCAAACATGcggggacatggaggc	Deletion of RTG1
	1703	RTG1_REV	AGGGTTATCACAACATAGCAATAGTGAGAGTCAGAAGTACTTTTAgggatcgacagcagt	Deletion of RTG1
	1704	RTG1_C	CCAGCGCTGAAGTCGCC	Confirmation of RTG1 Deletion
	1705	RTG1_D	AAACAGTCTTGCATTCATAACATCA	Confirmation of RTG1 Deletion
	1706	RTG3_FWD	TTATTTTTTGTCAGGCGAACCTACTTCTTAAATAAGTGAAGAATGcggggacatggaggc	Deletion of RTG3
	1707	RTG3_REV	CCTTTTTCAAATTTAATTTTTTCCCGCTAATAAGACCATAAACTAgggatcgacagcagt	Deletion of RTG3
	1708	RTG3_C	TATCTCCTTTTACCAATAACCACCA	Confirmation of RTG3 Deletion
	1709	RTG3_D	TCATGAAAGAAAATTACATGGGTTT	Confirmation of RTG3 Deletion
	1710	GLN3_FWD	GAGAGAGAGCACAGGGCCCCCTTTTCCCCCACCAACAAACAAATGcggggacatggaggc	Deletion of GLN3
	1711	GLN3_REV	AATTATTAACATAATAAGAATAATGATAATGATAATACGCGGTCAgggatcgacagcagt	Deletion of GLN3
	1712	GLN3_C	TTATATCGTCCGCAAACTTTAACTC	Confirmation of GLN3 Deletion
	1713	GNL3_D	AAACAAATAATACCAATGCTCAGGA	Confirmation of GLN3 Deletion
	1714	GAT1_FWD	ACATATATATAGGTGTGTGCCACTCCCGGCCCCGGTATTAGCATGcggggacatggaggc	Deletion of GAT1
	1715	GAT1_REV	GGGGGATCTATAAATTCAGATTCAACCAATCCAGGCTCAGATTGCgggatcgacagcagt	Deletion of GAT1
	1716	GAT1_C	TAGATCATCATTCTGGAGACACAAA	Confirmation of GAT1 Deletion
	1717	GAT1_D	GGTTGCTCTTACTGAGCTTCTAGTG	Confirmation of GAT1 Deletion
	1718	DAL80_FWD	CTATATTACATTATATTATATCATATTATATATAAGAGAATGGTGcggggacatggaggc	Deletion of DAL80
	1719	DAL80_REV	CTATATCCTGTTATATTTATACTGTCATGAACGCTACATCCTTTCgggatcgacagcagt	Deletion of DAL80
	1720	DAL80_C	GAAAGAAGAGACTGCTTACAACTGG	Confirmation of DAL80 Deletion
	1721	DAL80_D	CTTCATTTTCATTAAGAGCACGTTT	Confirmation of DAL80 Deletion
	1722	DAL81_FWD	TGTTTAGACGAGCGGCAGAACGACAGGCAGCCATACTATCAAATGcggggacatggaggc	Deletion of DAL81
	1723	DAL81_REV	TTATTACCGTATTCCATTTTTACTTATGTGCTATTATTTATATTAgggatcgacagcagt	Deletion of DAL81
	1724	DAL81_C	GAAGTCCAGCCATAAATAGTGCTAA	Confirmation of DAL81 Deletion
	1725	DAL81_D	GCAAAGTATAATAGACGAGGCAAAA	Confirmation of DAL81 Deletion
	1726	DAL82_FWD	GGTTTAACGATACTTTGAAAGGTTTAGGCGGAGCCAACCATAATGcggggacatggaggc	Deletion of DAL82
	1727	DAL82_REV	AGATACATATGGACATGAATCAAGCATATCTAATAGAAGTTTTTAgggatcgacagcagt	Deletion of DAL82
	1728	DAL82_C	ACCATATGCCTACAGACAAGATAGC	Confirmation of DAL82 Deletion
	1729	DAL82_D	CTTGGTGAAATGGAAGGTAAATATG	Confirmation of DAL82 Deletion
	1730	GZF3_FWD	TCGGGTATTTGTACTGTGCTCTACAATTCTACTGGTAATATTATGcggggacatggaggc	Deletion of GZF3
	1731	GZF3_REV	ATTATATTTGAAAAATGATGCTGATTTTTTTGAAAAAAAGATCTAgggatcgacagcagt	Deletion of GZF3
	1732	GZF3_C	ACATATCAATGAATTAGACGGGAAA	Confirmation of GZF3 Deletion
	1733	GZF3_D	CTTTTTGCAGTAGTTATTTGCATCA	Confirmation of GZF3 Deletion
	1734	GCN4_FWD	CACCAGCCACACAGCTCACTCATCTACTTCGCAATCAAAACAAAAcggggacatggaggc	Deletion of GCN4+ Upstream uORFs
	1735	GCN4_REV	ACGAGAATGAAATAAAAAATATAAAATAAAAGGTAAATGAAATCAgggatcgacagcagt	Deletion of GCN4+ Upstream uORFs
	1736	GCN4_C	CAAACAAGAAAGGTTAAGAAACCAA	Confirmation of GCN4 Deletion
	1737	GCN4_D	TTTAAAGTTTCATTCCAGCATTAGC	Confirmation of GCN4 Deletion
	1804	STP1_FWD	TATATGTACATAGACATATAAAGGGCATGTGGTAATTATGACATGcggggacatggaggc	Deletion of STP1
	1805	STP1_REV	TTCCAATATGATACCCTTATTTTTATCCCGTGTTATATTTAATCAgggatcgacagcagt	Deletion of STP1
	1806	STP1_C	ATCTTCATATGATTTGAGCGAAGAC	Confirmation of STP1 Deletion
	1807	STP1_D	AAAAAGAAATCACAAACGTCAAAAG	Confirmation of STP1 Deletion
	1808	STP2_FWD	AAAATACCTGAAACCGCCATAAAAATAATACCTGAATTAACCTTAcggggacatggaggc	Deletion of STP2
	1809	STP2_REV	GCAAGAGAGCAAAAAGTTGGGGAAGTAAGGAAATCCATTATCATGgggatcgacagcagt	Deletion of STP2
	1853	STP2_C	GCTCCTCTAAGGGCTAGAATAGAGA	Confirmation of STP2 Deletion
	1854	STP2_D	TTTGTTGTTCTGTTTGGGAAATAAT	Confirmation of STP2 Deletion
	1918	HO_FWD	CATATCCTCATAAGCAGCAATCAATTCTATCTATACTTTAAAATGcggggacatggaggc	Deletion of HO (WT Control)
	1919	HO_REV	TTACTTTTATTACATACAACTTTTTAAACTAATATACACATTTTAgggatcgacagcagt	Deletion of HO (WT Control)
	1888	HO_C	GAGTGGTAAAAATCGAGTATGTGCT	Confirmation of HO Deletion
	1889	HO_D	GTCACTGACCCAGTCTTGTC	Confirmation of HO Deletion
Colony PCR	47	KanC	TGATTTTGATGACGAGCGTAAT	Confirmation PCR Primer for KanMX
	613	NatC	TTTTCGCCTCGACATCATCT	Confirmation PCR Primer for NatMX
Seq.	1634	KAN_3SEQ_FWD	CAGACCGATACCAGGATCTTG	Sanger Sequencing Primer for Barcode Recovery
Genotype Barcode PCR and Indexing	1949	10x_Dialout_F	GTGACTGGAGTTCAGACGTGTGCTCTTCCGATCTNNNNNNgctcgatgagtttttctaaggatcc	Amplifies out KanBC barcodes from 10x WTA.
	1950	10x_Dialout_R	CTACACTCTTTCCCTACACGACGCTCTTCCG	PCR for Whole Transcriptome Amplification
	1951	10x_PD_D701_P7	CAAGCAGAAGACGGCATACGAGATcgagtaatGTGACTGGAGTTCAGACGTGT	Adds P7 & D701 i7 sequence to PERTURB dialout
	1952	10x_PD_D702_P7	CAAGCAGAAGACGGCATACGAGATtctccggaGTGACTGGAGTTCAGACGTGT	Adds P7 & D702 i7 sequence to PERTURB dialout
	1953	10x_PD_D704_p7	CAAGCAGAAGACGGCATACGAGATgagattccGTGACTGGAGTTCAGACGTGT	Adds P7 & D704 i7 sequence to PERTURB dialout
	1954	10x_PD_P5	AATGATACGGCGACCACCGAGATCTACACTCTTTCCCTACACGACG	Adds P5 sequence to TruSeq PCR handle
Bulk UMI Count RNA-seq RT Primers	2108	10x_RT_BC1	CTACACGACGCTCTTCCGATCTNNNNTCAGTCACTATCNNNNNNNNNNTTTTTTTTTTTTTTTTTTTTTTTTTTTTTTVN	Oligo dT + 14N UMI + Barcode + TruSeq PCR handle
	2109	10x_RT_BC2	CTACACGACGCTCTTCCGATCTNNNNTTCTGTCCGCAGNNNNNNNNNNTTTTTTTTTTTTTTTTTTTTTTTTTTTTTTVN	Oligo dT + 14N UMI + Barcode + TruSeq PCR handle
	2110	10x_RT_BC3	CTACACGACGCTCTTCCGATCTNNNNGTACTAGGTTCCNNNNNNNNNNTTTTTTTTTTTTTTTTTTTTTTTTTTTTTTVN	Oligo dT + 14N UMI + Barcode + TruSeq PCR handle
	2111	10x_RT_BC4	CTACACGACGCTCTTCCGATCTNNNNGATCCGTTATCCNNNNNNNNNNTTTTTTTTTTTTTTTTTTTTTTTTTTTTTTVN	Oligo dT + 14N UMI + Barcode + TruSeq PCR handle
	2112	10x_RT_BC5	CTACACGACGCTCTTCCGATCTNNNNATTCTAGCATCANNNNNNNNNNTTTTTTTTTTTTTTTTTTTTTTTTTTTTTTVN	Oligo dT + 14N UMI + Barcode + TruSeq PCR handle
	2113	10x_RT_BC6	CTACACGACGCTCTTCCGATCTNNNNTTGGTCAATGGTNNNNNNNNNNTTTTTTTTTTTTTTTTTTTTTTTTTTTTTTVN	Oligo dT + 14N UMI + Barcode + TruSeq PCR handle
TSO	1054	TSO	AAGCAGTGGTATCAACGCAGAGTACrGrG+G	Template Switch Oligo
	2140	TSO-PCR	AAGCAGTGGTATCAACGCAGAGT	PCR for Whole Transcriptome Amplification

## Sheet: Supplemental Table 2 - Strains
Strain ID (DGY)	Strain	Genotype	Parent	Barcode	Plate Location	Reference
1	FY4	MATa
2	FY5	MATα
1997	WT(ho)_A1	MATa Δho::KanMX	FY4	CAGAGGTTCGTCGTACGGC		This work
2062	WT(ho)_B1	MATa Δho::KanMX	FY4	TAGGTGTTTGATGTAAGTT		This work
2063	WT(ho)_C1	MATa Δho::KanMX	FY4	TAGAAGTTGGCAGTGCGTA		This work
2112	WT(ho)_D1	MATa Δho::KanMX	FY4	TCGGTGTGTGTTGTGGGTC		This work
2113	WT(ho)_E1	MATa Δho::KanMX	FY4	CTGTAGTGCGGAGTCCGAG		This work
2114	WT(ho)_F1	MATa Δho::KanMX	FY4	TAGATGTGTGGGGTAAGCC		This work
1840	rtg1_B2	MATa Δrtg1::KanMX	FY4	CGGTCGTTGGTAGTTAGTG		This work
1899	rtg1_C2	MATa Δrtg1::KanMX	FY4	CAGGTGTATGTAGTGGGTA		This work
1900	rtg1_D2	MATa Δrtg1::KanMX	FY4	TCGATGTCCGAAGTAGGAC		This work
1901	rtg1_E2	MATa Δrtg1::KanMX	FY4	AGGGGGTTGGCGGTGGGGC		This work
1902	rtg1_F2	MATa Δrtg1::KanMX	FY4	GAGGCGTGGGGGGTTCGGC		This work
1984	rtg1_G2	MATa Δrtg1::KanMX	FY4	GAGTAGTAAGCTGTAAGCG		This work
1841	rtg3_C3	MATa Δrtg3::KanMX	FY4	CTGTAGTCGGGCGTCTGTG		This work
1933	rtg3_D3	MATa Δrtg3::KanMX	FY4	TGGTTGTGTGTAGTACGTT		This work
1934	rtg3_E3	MATa Δrtg3::KanMX	FY4	TCGCAGTGAGATGTGTGTC		This work
1935	rtg3_F3	MATa Δrtg3::KanMX	FY4	CGGGGGTGGGCCGTGGGTG		This work
1936	rtg3_G3	MATa Δrtg3::KanMX	FY4	CCGTGGTAAGTAGTAAGTG		This work
1937	rtg3_H3	MATa Δrtg3::KanMX	FY4	TCGTAGTTAGTTGTAAGAT		This work
1839	gln3_A4	MATa Δgln3::KanMX	FY4	AAGCAGTATGTAGTGAGTC		This work
1893	gln3_D4	MATa Δgln3::KanMX	FY4	GTGCGGTTGGGCGTGGGCG		This work
1894	gln3_E4	MATa Δgln3::KanMX	FY4	CGGAAGTTTGCCGTTGGCC		This work
1895	gln3_F4	MATa Δgln3::KanMX	FY4	GTGGCGTGTGCGGTGCGGG		This work
1896	gln3_G4	MATa Δgln3::KanMX	FY4	CAGACGTGGGTAGTGAGAA		This work
1897	gln3_H4	MATa Δgln3::KanMX	FY4	TTGACGTCAGCCGTACGGA		This work
1838	gat1_A5	MATa Δgat1::KanMX	FY4	GCGGAGTCCGTGGTTAGGG		This work
1846	gat1_B5	MATa Δgat1::KanMX	FY4	AAGCCGTTTGGGGTGCGCT		This work
1847	gat1_E5	MATa Δgat1::KanMX	FY4	TCGACGTTGGAGGTTGGGG		This work
1848	gat1_F5	MATa Δgat1::KanMX	FY4	TTGTTGTGGGTCGTCCGAA		This work
1849	gat1_G5	MATa Δgat1::KanMX	FY4	AAGTTGTCGGCAGTGGGTT		This work
1850	gat1_H5	MATa Δgat1::KanMX	FY4	TGGGAGTGCGCCGTCGGCG		This work
1837	dal80_A6	MATa Δdal80::KanMX	FY4	GCGTTGTAAGGTGTCGGTC		This work
1865	dal80_B6	MATa Δdal80::KanMX	FY4	CTGCGGTTCGGTGTGAGTG		This work
1866	dal80_C6	MATa Δdal80::KanMX	FY4	AAGGTGTACGAAGTGTGAT		This work
1867	dal80_F6	MATa Δdal80::KanMX	FY4	AGGAAGTCTGCTGTGCGTA		This work
1868	dal80_G6	MATa Δdal80::KanMX	FY4	CGGCAGTTAGTAGTACGAT		This work
1982	dal80_H6	MATa Δdal80::KanMX	FY4	ACGCAGTACGATGTTTGCA		This work
1842	dal81_A7	MATa Δdal81::KanMX	FY4	GGGGCGTGAGGGGTGGGCT		This work
1869	dal81_B7	MATa Δdal81::KanMX	FY4	TAGTAGTGTGTAGTCTGTA		This work
1870	dal81_C7	MATa Δdal81::KanMX	FY4	CGGCAGTATGACGTTAGTA		This work
1871	dal81_D7	MATa Δdal81::KanMX	FY4	TTGGCGTCGGATGTAGGTC		This work
1872	dal81_G7	MATa Δdal81::KanMX	FY4	GGGAAGTCTGTAGTGTGCT		This work
1873	dal81_H7	MATa Δdal81::KanMX	FY4	TAGAGGTTCGATGTATGAT		This work
1843	dal82_A8	MATa Δdal82::KanMX	FY4	ATGCAGTACGGTGTCGGCA		This work
1876	dal82_B8	MATa Δdal82::KanMX	FY4	TGGAGGTTTGAAGTCAGAT		This work
1877	dal82_C8	MATa Δdal82::KanMX	FY4	GAGATGTTAGAGGTTCGGT		This work
1878	dal82_D8	MATa Δdal82::KanMX	FY4	AAGAAGTTGGTTGTCAGGG		This work
1879	dal82_E8	MATa Δdal82::KanMX	FY4	TCGCGGTCAGTAGTTTGAC		This work
1880	dal82_H8	MATa Δdal82::KanMX	FY4	CAGAAGTGCGTTGTTTGAT		This work
1844	gzf3_A9	MATa Δgzf3::KanMX	FY4	GTGCGGTTTGACGTGTGCC		This work
1858	gzf3_B9	MATa Δgzf3::KanMX	FY4	CAGTCGTTAGATGTAGGGG		This work
1859	gzf3_C9	MATa Δgzf3::KanMX	FY4	ACGGAGTAAGTGGTCAGTT		This work
1860	gzf3_D9	MATa Δgzf3::KanMX	FY4	ACGCTGTTTGATGTTAGTT		This work
1861	gzf3_E9	MATa Δgzf3::KanMX	FY4	CAGTTGTGTGATGTCGGGG		This work
1862	gzf3_F9	MATa Δgzf3::KanMX	FY4	TTGAGGTCTGCAGTGTGTA		This work
1845	gcn4_A10	MATa Δgcn4::KanMX	FY4	AGGTCGTTTGTAGTAGGAC		This work
1851	gcn4_C10	MATa Δgcn4::KanMX	FY4	TGGTGGTAAGAGGTCAGTG		This work
1852	gcn4_D10	MATa Δgcn4::KanMX	FY4	TTGACGTCAGCCGTCCGTG		This work
1853	gcn4_E10	MATa Δgcn4::KanMX	FY4	GAGATGTGTGTGGTTTGAA		This work
1854	gcn4_F10	MATa Δgcn4::KanMX	FY4	ATGGCGTCAGGCGTTCGAT		This work
1855	gcn4_G10	MATa Δgcn4::KanMX	FY4	TAGTAGTAAGGCGTAAGGG		This work
1903	stp1_C11	MATa Δstp1::KanMX	FY4	GTGGTGTTTGACGTAAGGC		This work
1904	stp1_D11	MATa Δstp1::KanMX	FY4	TAGTTGTTGGAGGTATGAT		This work
1905	stp1_E11	MATa Δstp1::KanMX	FY4	TTGGTGTCAGCTGTGGGAG		This work
1925	stp1_F11	MATa Δstp1::KanMX	FY4	GGGTGGTTAGAAGTACGCC		This work
1926	stp1_G11	MATa Δstp1::KanMX	FY4	GTGCGGTGGGCCGTGGGGG		This work
1927	stp1_H11	MATa Δstp1::KanMX	FY4	CAGCCGTTGGTGGTTTGAT		This work
1912	stp2_A12	MATa Δstp2::KanMX	FY4	TTGTAGTCTGTGGTAAGAA		This work
1913	stp2_D12	MATa Δstp2::KanMX	FY4	CTGTTGTGTGAGGTTCGGT		This work
1914	stp2_E12	MATa Δstp2::KanMX	FY4	TTGAAGTTAGAAGTAGGCA		This work
1915	stp2_F12	MATa Δstp2::KanMX	FY4	ATGGAGTTTGTTGTACGCT		This work
1916	stp2_G12	MATa Δstp2::KanMX	FY4	TAGATGTTGGGAGTAGGCA		This work
1978	stp2_H12	MATa Δstp2::KanMX	FY4	CCGAGGTATGTCGTTCGGT		This work
2100	rtg1	MATα Δrtg1::NatMX	FY5			This work
2101	rtg3	MATα Δrtg3::NatMX	FY5			This work
2102	gln3	MATα Δgln3::NatMX	FY5			This work
2103	gat1	MATα Δgat1::NatMX	FY5			This work
2104	dal80	MATα Δdal80::NatMX	FY5			This work
2105	dal81	MATα Δdal81::NatMX	FY5			This work
2106	dal82	MATα Δdal82::NatMX	FY5			This work
2107	gzf3	MATα Δgzf3::NatMX	FY5			This work
2108	gcn4	MATα Δgcn4::NatMX	FY5			This work
2109	stp1	MATα Δstp1::NatMX	FY5			This work
2110	stp2	MATα Δstp2::NatMX	FY5			This work
2111	ho	MATα Δho::NatMX	FY5			This work
N/A	WT(ho)_A1	MATa/MATα Δho::KanMX/Δho::NatMX		CAGAGGTTCGTCGTACGGC	BC_DEL_1_A1	This work
N/A	WT(ho)_B1	MATa/MATα Δho::KanMX/Δho::NatMX		TAGGTGTTTGATGTAAGTT	BC_DEL_1_B1	This work
N/A	WT(ho)_C1	MATa/MATα Δho::KanMX/Δho::NatMX		TAGAAGTTGGCAGTGCGTA	BC_DEL_1_C1	This work
N/A	WT(ho)_D1	MATa/MATα Δho::KanMX/Δho::NatMX		TCGGTGTGTGTTGTGGGTC	BC_DEL_1_D1	This work
N/A	WT(ho)_E1	MATa/MATα Δho::KanMX/Δho::NatMX		CTGTAGTGCGGAGTCCGAG	BC_DEL_1_E1	This work
N/A	WT(ho)_F1	MATa/MATα Δho::KanMX/Δho::NatMX		TAGATGTGTGGGGTAAGCC	BC_DEL_1_F1	This work
N/A	rtg1_B2	MATa/MATα Δrtg1::KanMX/Δrtg1::NatMX		CGGTCGTTGGTAGTTAGTG	BC_DEL_1_B2	This work
N/A	rtg1_C2	MATa/MATα Δrtg1::KanMX/Δrtg1::NatMX		CAGGTGTATGTAGTGGGTA	BC_DEL_1_C2	This work
N/A	rtg1_D2	MATa/MATα Δrtg1::KanMX/Δrtg1::NatMX		TCGATGTCCGAAGTAGGAC	BC_DEL_1_D2	This work
N/A	rtg1_E2	MATa/MATα Δrtg1::KanMX/Δrtg1::NatMX		AGGGGGTTGGCGGTGGGGC	BC_DEL_1_E2	This work
N/A	rtg1_F2	MATa/MATα Δrtg1::KanMX/Δrtg1::NatMX		GAGGCGTGGGGGGTTCGGC	BC_DEL_1_F2	This work
N/A	rtg1_G2	MATa/MATα Δrtg1::KanMX/Δrtg1::NatMX		GAGTAGTAAGCTGTAAGCG	BC_DEL_1_G2	This work
N/A	rtg3_C3	MATa/MATα Δrtg3::KanMX/Δrtg3::NatMX		CTGTAGTCGGGCGTCTGTG	BC_DEL_1_C3	This work
N/A	rtg3_D3	MATa/MATα Δrtg3::KanMX/Δrtg3::NatMX		TGGTTGTGTGTAGTACGTT	BC_DEL_1_D3	This work
N/A	rtg3_E3	MATa/MATα Δrtg3::KanMX/Δrtg3::NatMX		TCGCAGTGAGATGTGTGTC	BC_DEL_1_E3	This work
N/A	rtg3_F3	MATa/MATα Δrtg3::KanMX/Δrtg3::NatMX		CGGGGGTGGGCCGTGGGTG	BC_DEL_1_F3	This work
N/A	rtg3_G3	MATa/MATα Δrtg3::KanMX/Δrtg3::NatMX		CCGTGGTAAGTAGTAAGTG	BC_DEL_1_G3	This work
N/A	rtg3_H3	MATa/MATα Δrtg3::KanMX/Δrtg3::NatMX		TCGTAGTTAGTTGTAAGAT	BC_DEL_1_H3	This work
N/A	gln3_A4	MATa/MATα Δgln3::KanMX/Δgln3::NatMX		AAGCAGTATGTAGTGAGTC	BC_DEL_1_A4	This work
N/A	gln3_D4	MATa/MATα Δgln3::KanMX/Δgln3::NatMX		GTGCGGTTGGGCGTGGGCG	BC_DEL_1_D4	This work
N/A	gln3_E4	MATa/MATα Δgln3::KanMX/Δgln3::NatMX		CGGAAGTTTGCCGTTGGCC	BC_DEL_1_E4	This work
N/A	gln3_F4	MATa/MATα Δgln3::KanMX/Δgln3::NatMX		GTGGCGTGTGCGGTGCGGG	BC_DEL_1_F4	This work
N/A	gln3_G4	MATa/MATα Δgln3::KanMX/Δgln3::NatMX		CAGACGTGGGTAGTGAGAA	BC_DEL_1_G4	This work
N/A	gln3_H4	MATa/MATα Δgln3::KanMX/Δgln3::NatMX		TTGACGTCAGCCGTACGGA	BC_DEL_1_H4	This work
N/A	gat1_A5	MATa/MATα Δgat1::KanMX/Δgat1::NatMX		GCGGAGTCCGTGGTTAGGG	BC_DEL_1_A5	This work
N/A	gat1_B5	MATa/MATα Δgat1::KanMX/Δgat1::NatMX		AAGCCGTTTGGGGTGCGCT	BC_DEL_1_B5	This work
N/A	gat1_E5	MATa/MATα Δgat1::KanMX/Δgat1::NatMX		TCGACGTTGGAGGTTGGGG	BC_DEL_1_E5	This work
N/A	gat1_F5	MATa/MATα Δgat1::KanMX/Δgat1::NatMX		TTGTTGTGGGTCGTCCGAA	BC_DEL_1_F5	This work
N/A	gat1_G5	MATa/MATα Δgat1::KanMX/Δgat1::NatMX		AAGTTGTCGGCAGTGGGTT	BC_DEL_1_G5	This work
N/A	gat1_H5	MATa/MATα Δgat1::KanMX/Δgat1::NatMX		TGGGAGTGCGCCGTCGGCG	BC_DEL_1_H5	This work
N/A	dal80_A6	MATa/MATα Δdal80::KanMX/Δdal80::NatMX		GCGTTGTAAGGTGTCGGTC	BC_DEL_1_A6	This work
N/A	dal80_B6	MATa/MATα Δdal80::KanMX/Δdal80::NatMX		CTGCGGTTCGGTGTGAGTG	BC_DEL_1_B6	This work
N/A	dal80_C6	MATa/MATα Δdal80::KanMX/Δdal80::NatMX		AAGGTGTACGAAGTGTGAT	BC_DEL_1_C6	This work
N/A	dal80_F6	MATa/MATα Δdal80::KanMX/Δdal80::NatMX		AGGAAGTCTGCTGTGCGTA	BC_DEL_1_F6	This work
N/A	dal80_G6	MATa/MATα Δdal80::KanMX/Δdal80::NatMX		CGGCAGTTAGTAGTACGAT	BC_DEL_1_G6	This work
N/A	dal80_H6	MATa/MATα Δdal80::KanMX/Δdal80::NatMX		ACGCAGTACGATGTTTGCA	BC_DEL_1_H6	This work
N/A	dal81_A7	MATa/MATα Δdal81::KanMX/Δdal81::NatMX		GGGGCGTGAGGGGTGGGCT	BC_DEL_1_A7	This work
N/A	dal81_B7	MATa/MATα Δdal81::KanMX/Δdal81::NatMX		TAGTAGTGTGTAGTCTGTA	BC_DEL_1_B7	This work
N/A	dal81_C7	MATa/MATα Δdal81::KanMX/Δdal81::NatMX		CGGCAGTATGACGTTAGTA	BC_DEL_1_C7	This work
N/A	dal81_D7	MATa/MATα Δdal81::KanMX/Δdal81::NatMX		TTGGCGTCGGATGTAGGTC	BC_DEL_1_D7	This work
N/A	dal81_G7	MATa/MATα Δdal81::KanMX/Δdal81::NatMX		GGGAAGTCTGTAGTGTGCT	BC_DEL_1_G7	This work
N/A	dal81_H7	MATa/MATα Δdal81::KanMX/Δdal81::NatMX		TAGAGGTTCGATGTATGAT	BC_DEL_1_H7	This work
N/A	dal82_A8	MATa/MATα Δdal82::KanMX/Δdal82::NatMX		ATGCAGTACGGTGTCGGCA	BC_DEL_1_A8	This work
N/A	dal82_B8	MATa/MATα Δdal82::KanMX/Δdal82::NatMX		TGGAGGTTTGAAGTCAGAT	BC_DEL_1_B8	This work
N/A	dal82_C8	MATa/MATα Δdal82::KanMX/Δdal82::NatMX		GAGATGTTAGAGGTTCGGT	BC_DEL_1_C8	This work
N/A	dal82_D8	MATa/MATα Δdal82::KanMX/Δdal82::NatMX		AAGAAGTTGGTTGTCAGGG	BC_DEL_1_D8	This work
N/A	dal82_E8	MATa/MATα Δdal82::KanMX/Δdal82::NatMX		TCGCGGTCAGTAGTTTGAC	BC_DEL_1_E8	This work
N/A	dal82_H8	MATa/MATα Δdal82::KanMX/Δdal82::NatMX		CAGAAGTGCGTTGTTTGAT	BC_DEL_1_H8	This work
N/A	gzf3_A9	MATa/MATα Δgzf3::KanMX/Δgzf3::NatMX		GTGCGGTTTGACGTGTGCC	BC_DEL_1_A9	This work
N/A	gzf3_B9	MATa/MATα Δgzf3::KanMX/Δgzf3::NatMX		CAGTCGTTAGATGTAGGGG	BC_DEL_1_B9	This work
N/A	gzf3_C9	MATa/MATα Δgzf3::KanMX/Δgzf3::NatMX		ACGGAGTAAGTGGTCAGTT	BC_DEL_1_C9	This work
N/A	gzf3_D9	MATa/MATα Δgzf3::KanMX/Δgzf3::NatMX		ACGCTGTTTGATGTTAGTT	BC_DEL_1_D9	This work
N/A	gzf3_E9	MATa/MATα Δgzf3::KanMX/Δgzf3::NatMX		CAGTTGTGTGATGTCGGGG	BC_DEL_1_E9	This work
N/A	gzf3_F9	MATa/MATα Δgzf3::KanMX/Δgzf3::NatMX		TTGAGGTCTGCAGTGTGTA	BC_DEL_1_F9	This work
N/A	gcn4_A10	MATa/MATα Δgcn4::KanMX/Δgcn4::NatMX		AGGTCGTTTGTAGTAGGAC	BC_DEL_1_A10	This work
N/A	gcn4_C10	MATa/MATα Δgcn4::KanMX/Δgcn4::NatMX		TGGTGGTAAGAGGTCAGTG	BC_DEL_1_C10	This work
N/A	gcn4_D10	MATa/MATα Δgcn4::KanMX/Δgcn4::NatMX		TTGACGTCAGCCGTCCGTG	BC_DEL_1_D10	This work
N/A	gcn4_E10	MATa/MATα Δgcn4::KanMX/Δgcn4::NatMX		GAGATGTGTGTGGTTTGAA	BC_DEL_1_E10	This work
N/A	gcn4_F10	MATa/MATα Δgcn4::KanMX/Δgcn4::NatMX		ATGGCGTCAGGCGTTCGAT	BC_DEL_1_F10	This work
N/A	gcn4_G10	MATa/MATα Δgcn4::KanMX/Δgcn4::NatMX		TAGTAGTAAGGCGTAAGGG	BC_DEL_1_G10	This work
N/A	stp1_C11	MATa/MATα Δstp1::KanMX/Δstp1::NatMX		GTGGTGTTTGACGTAAGGC	BC_DEL_1_C11	This work
N/A	stp1_D11	MATa/MATα Δstp1::KanMX/Δstp1::NatMX		TAGTTGTTGGAGGTATGAT	BC_DEL_1_D11	This work
N/A	stp1_E11	MATa/MATα Δstp1::KanMX/Δstp1::NatMX		TTGGTGTCAGCTGTGGGAG	BC_DEL_1_E11	This work
N/A	stp1_F11	MATa/MATα Δstp1::KanMX/Δstp1::NatMX		GGGTGGTTAGAAGTACGCC	BC_DEL_1_F11	This work
N/A	stp1_G11	MATa/MATα Δstp1::KanMX/Δstp1::NatMX		GTGCGGTGGGCCGTGGGGG	BC_DEL_1_G11	This work
N/A	stp1_H11	MATa/MATα Δstp2::KanMX/Δstp2::NatMX		CAGCCGTTGGTGGTTTGAT	BC_DEL_1_H11	This work
N/A	stp2_A12	MATa/MATα Δstp1::KanMX/Δstp1::NatMX		TTGTAGTCTGTGGTAAGAA	BC_DEL_1_A12	This work
N/A	stp2_D12	MATa/MATα Δstp1::KanMX/Δstp1::NatMX		CTGTTGTGTGAGGTTCGGT	BC_DEL_1_D12	This work
N/A	stp2_E12	MATa/MATα Δstp1::KanMX/Δstp1::NatMX		TTGAAGTTAGAAGTAGGCA	BC_DEL_1_E12	This work
N/A	stp2_F12	MATa/MATα Δstp1::KanMX/Δstp1::NatMX		ATGGAGTTTGTTGTACGCT	BC_DEL_1_F12	This work
N/A	stp2_G12	MATa/MATα Δstp1::KanMX/Δstp1::NatMX		TAGATGTTGGGAGTAGGCA	BC_DEL_1_G12	This work
N/A	stp2_H12	MATa/MATα Δstp1::KanMX/Δstp1::NatMX		CCGAGGTATGTCGTTCGGT	BC_DEL_1_H12	This work

## Sheet: Supplemental Table 3 - Plasmids
Plasmid ID (DGP)	Name	Description	Source
52	pUC19
212	pUG6	loxP-flanked marker gene deletion cassette: loxP-pAgTEF1-kanMX-tAgTEF1-loxP, selectable phenotype: G418 resistance	Euroscarf
290	pWS158		Addgene (Ellis Lab)
304	pUC19-KanBC	DG1628+1629 from pUG6 (pTEF-KAN) and DG1630+1659 from pUG6 (tTEF) assembled into pUC19 backbone (amplified with DG1640+1641)	This work
306	pUC19-KanBC[GFP]	DGP304 linearized with BamHI & XbaI and GFP amplified from DGP290 with DG1751 & 1752 assembled by gibson	This work

## Sheet: Supplemental Table 4 - Media
Media	Composition	Source
YPD	2% (w/v) peptone	BD Difco #DF0118-17-0
	2% (w/v) glucose	BD Difco #DF0155-08-5
	1% (w/v) yeast extract	BD Difco #DF0127-17-9
YPEthanol	2% (w/v) peptone	BD Difco #DF0118-17-0
	2% (v/v) ethanol	Pharmco-Aaper #111000200
	1% (w/v) yeast extract	BD Difco #DF0127-17-9
Minimal Trace Metals (1x)	500 µg/L (8.09 µM) Boric Acid	Sigma #B6768
	400 µg/L (2.37 µM) Manganese (II) Sulfate Monohydrate	Sigma # M7634
	400 µg/L (1.39 µM) Zinc Sulfate Heptahydrate	Fisher #Z68-500
	200 µg/L (0.83 µM) Sodium Molybdate Dihydrate	Sigma #331058
	200 µg/L (0.74 µM) Ferric (III) Chloride Hexahydrate	Fisher #I88-100
	100 µg/L (0.60 µM) Potassium Iodide	Sigma #60400
	40 µg/L (0.16 µM) Copper (II) Sulfate Pentahydrate	Sigma #209198
Minimal Vitamins (1x)	2 mg/L (11.10 µM) Inositol	Acros Organics #AC12226-1000
	400 µg/L (3.25 µM) Nicotinic Acid	Sigma #N4126
	400 µg/L (1.95 µM) Pyridoxine Hydrochloride	Sigma #P9755
	200 µg/L (1.46 µM) 4-Aminobenzoic Acid	Acros Organics #AC14621-2500
	400 µg/L (1.19 µM) Thiamine Hydrochloride	Fisher #BP892-100
	400 µg/L (0.84 µM) D-Calcium Pantothenate	Acros Organics #AC24330-1000
	200 µg/L (0.53 µM) Riboflavin	Sigma #R4500-25G
	2 µg/L (8.19 nM) D-Biotin	Fisher #BP232-1
	2 µg/L (4.53 nM) Folic Acid	Sigma #F7876
Minimal Salts (1x)	0.1 g/L (0.68 mM) Calcium Chloride Dihydrate	Fisher #C79-500
	0.1 g/L (1.71 mM) Sodium Chloride	Fisher #BP358-212
	0.5 g/L (2.46 mM) Magnesium Chloride Hexahydrate	Sigma #M9272
	1.0 g/L (7.35 mM) Potassium Phosphate Monobasic	VWR #97062-346
Minimal Media	1x Minimal Trace Metals	Above
	1x Minimal Salts	Above
	1x Minimal Vitamins	Above
	2% (w/v) glucose	BD Difco #DF0155-08-5
	20 mM Ammonium Sulfate	Acros Organics #AC423400010
Minimal Media (Ethanol)	1x Minimal Trace Metals	Above
	1x Minimal Salts	Above
	1x Minimal Vitamins	Above
	2% (v/v) ethanol	Pharmco-Aaper #111000200
	20 mM Ammonium Sulfate	Acros Organics #AC423400010
Nitrogen Limiting Minimal Media (Glutamine)	1x Minimal Trace Metals	Above
	1x Minimal Salts	Above
	1x Minimal Vitamins	Above
	2% (w/v) glucose	BD Difco #DF0155-08-5
	800 µM L(+)-Glutamine	Acros Organics #119951000
Nitrogen Limiting Minimal Media (Proline)	1x Minimal Trace Metals	Above
	1x Minimal Salts	Above
	1x Minimal Vitamins	Above
	2% (w/v) glucose	BD Difco #DF0155-08-5
	800 µM L-Proline	Sigma #P0380-100G
Nitrogen Limiting Minimal Media (Ammonium Sulfate)	1x Minimal Trace Metals	Above
	1x Minimal Salts	Above
	1x Minimal Vitamins	Above
	2% (w/v) glucose	BD Difco #DF0155-08-5
	800 µM Ammonium Sulfate	Acros Organics #AC423400010
Nitrogen Limiting Minimal Media (Ammonium Sulfate)	1x Minimal Trace Metals	Above
	1x Minimal Salts	Above
	1x Minimal Vitamins	Above
	2% (w/v) glucose	BD Difco #DF0155-08-5
	800 µM Urea	Acros Organics #AC434720010
Starvation Media	1x Minimal Trace Metals	Above
	1x Minimal Salts	Above
	1x Minimal Vitamins	Above
	1 mM Ammonium Sulfate	Acros Organics #AC423400010

## Sheet: Supplemental Table 5 - CV Resul
Figure	Label	Normalization	Tranformation	Imputation	Tasking	Input_Data	Priors	Gold Standard	Conditions	Size	Count	Seed	AUPR	N_CONF	N_PREC
Figure_5a	Shuffled		Log2		STL	Single_Cell_Data	Shuffled	Tchourine_2018	ALL	1	38225	42	0.018972	6891	0
Figure_5a	Shuffled		Log2		STL	Single_Cell_Data	Shuffled	Tchourine_2018	ALL	1	38225	43	0.0219593	7182	86
Figure_5a	Shuffled		Log2		STL	Single_Cell_Data	Shuffled	Tchourine_2018	ALL	1	38225	44	0.0275399	6585	0
Figure_5a	Shuffled		Log2		STL	Single_Cell_Data	Shuffled	Tchourine_2018	ALL	1	38225	45	0.0211717	7223	0
Figure_5a	Shuffled		Log2		STL	Single_Cell_Data	Shuffled	Tchourine_2018	ALL	1	38225	46	0.0208711	6980	0
Figure_5a	Shuffled		Log2		STL	Single_Cell_Data	Shuffled	Tchourine_2018	ALL	1	38225	47	0.0221919	7085	0
Figure_5a	Shuffled		Log2		STL	Single_Cell_Data	Shuffled	Tchourine_2018	ALL	1	38225	48	0.0244091	7078	0
Figure_5a	Shuffled		Log2		STL	Single_Cell_Data	Shuffled	Tchourine_2018	ALL	1	38225	49	0.0181399	6750	0
Figure_5a	Shuffled		Log2		STL	Single_Cell_Data	Shuffled	Tchourine_2018	ALL	1	38225	50	0.0229743	6736	0
Figure_5a	Shuffled		Log2		STL	Single_Cell_Data	Shuffled	Tchourine_2018	ALL	1	38225	51	0.0193285	6869	0
Figure_5a	Neg Data		Log2		STL	Simulated_Neg_Data		Tchourine_2018	ALL	1	38225	42	0.0635758	10919	0
Figure_5a	Neg Data		Log2		STL	Simulated_Neg_Data		Tchourine_2018	ALL	1	38225	43	0.0845	11072	574
Figure_5a	Neg Data		Log2		STL	Simulated_Neg_Data		Tchourine_2018	ALL	1	38225	44	0.0857921	10102	0
Figure_5a	Neg Data		Log2		STL	Simulated_Neg_Data		Tchourine_2018	ALL	1	38225	45	0.0743362	10608	0
Figure_5a	Neg Data		Log2		STL	Simulated_Neg_Data		Tchourine_2018	ALL	1	38225	46	0.0849051	10968	544
Figure_5a	Neg Data		Log2		STL	Simulated_Neg_Data		Tchourine_2018	ALL	1	38225	47	0.0820384	10158	0
Figure_5a	Neg Data		Log2		STL	Simulated_Neg_Data		Tchourine_2018	ALL	1	38225	48	0.0954433	11692	546
Figure_5a	Neg Data		Log2		STL	Simulated_Neg_Data		Tchourine_2018	ALL	1	38225	49	0.0769858	11671	0
Figure_5a	Neg Data		Log2		STL	Simulated_Neg_Data		Tchourine_2018	ALL	1	38225	50	0.0789052	10804	0
Figure_5a	Neg Data		Log2		STL	Simulated_Neg_Data		Tchourine_2018	ALL	1	38225	51	0.0797539	10719	0
Figure_5a	No Impute		Log2		STL	Single_Cell_Data		Tchourine_2018	ALL	1	38225	42	0.19182	7099	941
Figure_5a	No Impute		Log2		STL	Single_Cell_Data		Tchourine_2018	ALL	1	38225	43	0.193178	7165	950
Figure_5a	No Impute		Log2		STL	Single_Cell_Data		Tchourine_2018	ALL	1	38225	44	0.218051	6957	1108
Figure_5a	No Impute		Log2		STL	Single_Cell_Data		Tchourine_2018	ALL	1	38225	45	0.166292	7026	763
Figure_5a	No Impute		Log2		STL	Single_Cell_Data		Tchourine_2018	ALL	1	38225	46	0.195412	6741	1034
Figure_5a	No Impute		Log2		STL	Single_Cell_Data		Tchourine_2018	ALL	1	38225	47	0.207105	7364	936
Figure_5a	No Impute		Log2		STL	Single_Cell_Data		Tchourine_2018	ALL	1	38225	48	0.200316	7334	1034
Figure_5a	No Impute		Log2		STL	Single_Cell_Data		Tchourine_2018	ALL	1	38225	49	0.17243	6991	771
Figure_5a	No Impute		Log2		STL	Single_Cell_Data		Tchourine_2018	ALL	1	38225	50	0.178266	6866	721
Figure_5a	No Impute		Log2		STL	Single_Cell_Data		Tchourine_2018	ALL	1	38225	51	0.202119	6925	936
Figure_5a	ScImpute		Log2	ScImpute	STL	SCIMPUTE_DATA		Tchourine_2018	ALL	1	38225	42	0.192753	10180	896
Figure_5a	ScImpute		Log2	ScImpute	STL	SCIMPUTE_DATA		Tchourine_2018	ALL	1	38225	43	0.16822	9910	1044
Figure_5a	ScImpute		Log2	ScImpute	STL	SCIMPUTE_DATA		Tchourine_2018	ALL	1	38225	44	0.17491	9879	1116
Figure_5a	ScImpute		Log2	ScImpute	STL	SCIMPUTE_DATA		Tchourine_2018	ALL	1	38225	45	0.174794	10501	1072
Figure_5a	ScImpute		Log2	ScImpute	STL	SCIMPUTE_DATA		Tchourine_2018	ALL	1	38225	46	0.18518	10009	1362
Figure_5a	ScImpute		Log2	ScImpute	STL	SCIMPUTE_DATA		Tchourine_2018	ALL	1	38225	47	0.227053	10344	1405
Figure_5a	ScImpute		Log2	ScImpute	STL	SCIMPUTE_DATA		Tchourine_2018	ALL	1	38225	48	0.183022	10266	1035
Figure_5a	ScImpute		Log2	ScImpute	STL	SCIMPUTE_DATA		Tchourine_2018	ALL	1	38225	49	0.159146	10164	1058
Figure_5a	ScImpute		Log2	ScImpute	STL	SCIMPUTE_DATA		Tchourine_2018	ALL	1	38225	50	0.183885	10274	692
Figure_5a	ScImpute		Log2	ScImpute	STL	SCIMPUTE_DATA		Tchourine_2018	ALL	1	38225	51	0.162547	10478	1093
Figure_5a	VIPER		Log2	VIPER	STL	VIPER_Data		Tchourine_2018	ALL	1	38225	42	0.210361	11910	1063
Figure_5a	VIPER		Log2	VIPER	STL	VIPER_Data		Tchourine_2018	ALL	1	38225	43	0.16275	11758	1220
Figure_5a	VIPER		Log2	VIPER	STL	VIPER_Data		Tchourine_2018	ALL	1	38225	44	0.191888	11926	894
Figure_5a	VIPER		Log2	VIPER	STL	VIPER_Data		Tchourine_2018	ALL	1	38225	45	0.184934	11825	1007
Figure_5a	VIPER		Log2	VIPER	STL	VIPER_Data		Tchourine_2018	ALL	1	38225	46	0.207916	11680	1387
Figure_5a	VIPER		Log2	VIPER	STL	VIPER_Data		Tchourine_2018	ALL	1	38225	47	0.229576	11791	1042
Figure_5a	VIPER		Log2	VIPER	STL	VIPER_Data		Tchourine_2018	ALL	1	38225	48	0.209445	11827	1245
Figure_5a	VIPER		Log2	VIPER	STL	VIPER_Data		Tchourine_2018	ALL	1	38225	49	0.17623	11904	914
Figure_5a	VIPER		Log2	VIPER	STL	VIPER_Data		Tchourine_2018	ALL	1	38225	50	0.222918	11869	802
Figure_5a	VIPER		Log2	VIPER	STL	VIPER_Data		Tchourine_2018	ALL	1	38225	51	0.20456	11903	1205
Figure_5a	MAGIC		Sqrt	MAGIC	STL	MAGIC_Data		Tchourine_2018	ALL	1	38225	42	0.0699483	13276	154
Figure_5a	MAGIC		Sqrt	MAGIC	STL	MAGIC_Data		Tchourine_2018	ALL	1	38225	43	0.0766636	13279	288
Figure_5a	MAGIC		Sqrt	MAGIC	STL	MAGIC_Data		Tchourine_2018	ALL	1	38225	44	0.0723086	13241	475
Figure_5a	MAGIC		Sqrt	MAGIC	STL	MAGIC_Data		Tchourine_2018	ALL	1	38225	45	0.0974755	13227	650
Figure_5a	MAGIC		Sqrt	MAGIC	STL	MAGIC_Data		Tchourine_2018	ALL	1	38225	46	0.103083	13356	735
Figure_5a	MAGIC		Sqrt	MAGIC	STL	MAGIC_Data		Tchourine_2018	ALL	1	38225	47	0.0843959	13202	322
Figure_5a	MAGIC		Sqrt	MAGIC	STL	MAGIC_Data		Tchourine_2018	ALL	1	38225	48	0.0998794	13197	657
Figure_5a	MAGIC		Sqrt	MAGIC	STL	MAGIC_Data		Tchourine_2018	ALL	1	38225	49	0.0669058	13082	78
Figure_5a	MAGIC		Sqrt	MAGIC	STL	MAGIC_Data		Tchourine_2018	ALL	1	38225	50	0.0848027	13105	292
Figure_5a	MAGIC		Sqrt	MAGIC	STL	MAGIC_Data		Tchourine_2018	ALL	1	38225	51	0.075592	13396	171
Figure_5b			Log2		STL	Single_Cell_Data	NONE-NoTFA	Tchourine_2018	ALL	0.01	382	42	0.0241795	428	0
Figure_5b			Log2		STL	Single_Cell_Data	NONE-NoTFA	Tchourine_2018	ALL	0.01	382	43	0.0161417	699	0
Figure_5b			Log2		STL	Single_Cell_Data	NONE-NoTFA	Tchourine_2018	ALL	0.01	382	44	0.0220047	684	0
Figure_5b			Log2		STL	Single_Cell_Data	NONE-NoTFA	Tchourine_2018	ALL	0.01	382	45	0.0257322	485	0
Figure_5b			Log2		STL	Single_Cell_Data	NONE-NoTFA	Tchourine_2018	ALL	0.01	382	46	0.0266698	386	56
Figure_5b			Log2		STL	Single_Cell_Data	NONE-NoTFA	Tchourine_2018	ALL	0.01	382	47	0.0205167	542	0
Figure_5b			Log2		STL	Single_Cell_Data	NONE-NoTFA	Tchourine_2018	ALL	0.01	382	48	0.0173606	485	0
Figure_5b			Log2		STL	Single_Cell_Data	NONE-NoTFA	Tchourine_2018	ALL	0.01	382	49	0.0211064	546	0
Figure_5b			Log2		STL	Single_Cell_Data	NONE-NoTFA	Tchourine_2018	ALL	0.01	382	50	0.0206244	614	18
Figure_5b			Log2		STL	Single_Cell_Data	NONE-NoTFA	Tchourine_2018	ALL	0.01	382	51	0.0177468	484	0
Figure_5b			Log2		STL	Single_Cell_Data	NONE-NoTFA	Tchourine_2018	ALL	0.01	382	52	0.024432	418	7
Figure_5b			Log2		STL	Single_Cell_Data	NONE-NoTFA	Tchourine_2018	ALL	0.01	382	53	0.0229089	624	32
Figure_5b			Log2		STL	Single_Cell_Data	NONE-NoTFA	Tchourine_2018	ALL	0.01	382	54	0.024284	524	21
Figure_5b			Log2		STL	Single_Cell_Data	NONE-NoTFA	Tchourine_2018	ALL	0.01	382	55	0.0212404	527	0
Figure_5b			Log2		STL	Single_Cell_Data	NONE-NoTFA	Tchourine_2018	ALL	0.01	382	56	0.0162537	539	0
Figure_5b			Log2		STL	Single_Cell_Data	NONE-NoTFA	Tchourine_2018	ALL	0.01	382	57	0.0206722	612	37
Figure_5b			Log2		STL	Single_Cell_Data	NONE-NoTFA	Tchourine_2018	ALL	0.01	382	58	0.0214061	575	41
Figure_5b			Log2		STL	Single_Cell_Data	NONE-NoTFA	Tchourine_2018	ALL	0.01	382	59	0.0219557	500	0
Figure_5b			Log2		STL	Single_Cell_Data	NONE-NoTFA	Tchourine_2018	ALL	0.01	382	60	0.0208204	406	38
Figure_5b			Log2		STL	Single_Cell_Data	NONE-NoTFA	Tchourine_2018	ALL	0.01	382	61	0.0247595	471	62
Figure_5b			Log2		STL	Single_Cell_Data	NONE-NoTFA	Tchourine_2018	ALL	0.025	955	42	0.026048	1247	0
Figure_5b			Log2		STL	Single_Cell_Data	NONE-NoTFA	Tchourine_2018	ALL	0.025	955	43	0.0179528	1323	0
Figure_5b			Log2		STL	Single_Cell_Data	NONE-NoTFA	Tchourine_2018	ALL	0.025	955	44	0.0231319	1441	56
Figure_5b			Log2		STL	Single_Cell_Data	NONE-NoTFA	Tchourine_2018	ALL	0.025	955	45	0.0243646	1239	0
Figure_5b			Log2		STL	Single_Cell_Data	NONE-NoTFA	Tchourine_2018	ALL	0.025	955	46	0.0312998	1056	93
Figure_5b			Log2		STL	Single_Cell_Data	NONE-NoTFA	Tchourine_2018	ALL	0.025	955	47	0.0224905	1289	0
Figure_5b			Log2		STL	Single_Cell_Data	NONE-NoTFA	Tchourine_2018	ALL	0.025	955	48	0.0191504	1250	0
Figure_5b			Log2		STL	Single_Cell_Data	NONE-NoTFA	Tchourine_2018	ALL	0.025	955	49	0.0218008	1244	0
Figure_5b			Log2		STL	Single_Cell_Data	NONE-NoTFA	Tchourine_2018	ALL	0.025	955	50	0.0244382	1453	15
Figure_5b			Log2		STL	Single_Cell_Data	NONE-NoTFA	Tchourine_2018	ALL	0.025	955	51	0.0201319	1179	0
Figure_5b			Log2		STL	Single_Cell_Data	NONE-NoTFA	Tchourine_2018	ALL	0.025	955	52	0.0248575	1299	0
Figure_5b			Log2		STL	Single_Cell_Data	NONE-NoTFA	Tchourine_2018	ALL	0.025	955	53	0.0220804	1261	56
Figure_5b			Log2		STL	Single_Cell_Data	NONE-NoTFA	Tchourine_2018	ALL	0.025	955	54	0.0225784	1125	51
Figure_5b			Log2		STL	Single_Cell_Data	NONE-NoTFA	Tchourine_2018	ALL	0.025	955	55	0.0250417	1330	32
Figure_5b			Log2		STL	Single_Cell_Data	NONE-NoTFA	Tchourine_2018	ALL	0.025	955	56	0.0180768	1148	0
Figure_5b			Log2		STL	Single_Cell_Data	NONE-NoTFA	Tchourine_2018	ALL	0.025	955	57	0.0233414	1170	39
Figure_5b			Log2		STL	Single_Cell_Data	NONE-NoTFA	Tchourine_2018	ALL	0.025	955	58	0.0217749	1081	44
Figure_5b			Log2		STL	Single_Cell_Data	NONE-NoTFA	Tchourine_2018	ALL	0.025	955	59	0.024434	1313	0
Figure_5b			Log2		STL	Single_Cell_Data	NONE-NoTFA	Tchourine_2018	ALL	0.025	955	60	0.0211844	1055	54
Figure_5b			Log2		STL	Single_Cell_Data	NONE-NoTFA	Tchourine_2018	ALL	0.025	955	61	0.025237	1265	51
Figure_5b			Log2		STL	Single_Cell_Data	NONE-NoTFA	Tchourine_2018	ALL	0.05	1911	42	0.0262031	1769	0
Figure_5b			Log2		STL	Single_Cell_Data	NONE-NoTFA	Tchourine_2018	ALL	0.05	1911	43	0.0189436	1855	0
Figure_5b			Log2		STL	Single_Cell_Data	NONE-NoTFA	Tchourine_2018	ALL	0.05	1911	44	0.0229225	2053	36
Figure_5b			Log2		STL	Single_Cell_Data	NONE-NoTFA	Tchourine_2018	ALL	0.05	1911	45	0.0256603	1995	0
Figure_5b			Log2		STL	Single_Cell_Data	NONE-NoTFA	Tchourine_2018	ALL	0.05	1911	46	0.0295981	1764	75
Figure_5b			Log2		STL	Single_Cell_Data	NONE-NoTFA	Tchourine_2018	ALL	0.05	1911	47	0.0244605	2067	0
Figure_5b			Log2		STL	Single_Cell_Data	NONE-NoTFA	Tchourine_2018	ALL	0.05	1911	48	0.0247193	1968	0
Figure_5b			Log2		STL	Single_Cell_Data	NONE-NoTFA	Tchourine_2018	ALL	0.05	1911	49	0.0227106	2094	0
Figure_5b			Log2		STL	Single_Cell_Data	NONE-NoTFA	Tchourine_2018	ALL	0.05	1911	50	0.0245674	2042	0
Figure_5b			Log2		STL	Single_Cell_Data	NONE-NoTFA	Tchourine_2018	ALL	0.05	1911	51	0.022184	1892	0
Figure_5b			Log2		STL	Single_Cell_Data	NONE-NoTFA	Tchourine_2018	ALL	0.05	1911	52	0.0303895	1961	61
Figure_5b			Log2		STL	Single_Cell_Data	NONE-NoTFA	Tchourine_2018	ALL	0.05	1911	53	0.0233299	1858	54
Figure_5b			Log2		STL	Single_Cell_Data	NONE-NoTFA	Tchourine_2018	ALL	0.05	1911	54	0.0224651	1959	0
Figure_5b			Log2		STL	Single_Cell_Data	NONE-NoTFA	Tchourine_2018	ALL	0.05	1911	55	0.0262446	2248	0
Figure_5b			Log2		STL	Single_Cell_Data	NONE-NoTFA	Tchourine_2018	ALL	0.05	1911	56	0.0185608	1983	0
Figure_5b			Log2		STL	Single_Cell_Data	NONE-NoTFA	Tchourine_2018	ALL	0.05	1911	57	0.0258553	1961	21
Figure_5b			Log2		STL	Single_Cell_Data	NONE-NoTFA	Tchourine_2018	ALL	0.05	1911	58	0.0234616	1672	0
Figure_5b			Log2		STL	Single_Cell_Data	NONE-NoTFA	Tchourine_2018	ALL	0.05	1911	59	0.0252854	1887	0
Figure_5b			Log2		STL	Single_Cell_Data	NONE-NoTFA	Tchourine_2018	ALL	0.05	1911	60	0.0231805	1795	48
Figure_5b			Log2		STL	Single_Cell_Data	NONE-NoTFA	Tchourine_2018	ALL	0.05	1911	61	0.0259795	2133	61
Figure_5b			Log2		STL	Single_Cell_Data	NONE-NoTFA	Tchourine_2018	ALL	0.1	3822	42	0.0278805	2688	0
Figure_5b			Log2		STL	Single_Cell_Data	NONE-NoTFA	Tchourine_2018	ALL	0.1	3822	43	0.0208303	2675	0
Figure_5b			Log2		STL	Single_Cell_Data	NONE-NoTFA	Tchourine_2018	ALL	0.1	3822	44	0.0233144	2725	31
Figure_5b			Log2		STL	Single_Cell_Data	NONE-NoTFA	Tchourine_2018	ALL	0.1	3822	45	0.0280145	2721	0
Figure_5b			Log2		STL	Single_Cell_Data	NONE-NoTFA	Tchourine_2018	ALL	0.1	3822	46	0.0303667	2762	90
Figure_5b			Log2		STL	Single_Cell_Data	NONE-NoTFA	Tchourine_2018	ALL	0.1	3822	47	0.0233346	2731	0
Figure_5b			Log2		STL	Single_Cell_Data	NONE-NoTFA	Tchourine_2018	ALL	0.1	3822	48	0.0246175	2764	0
Figure_5b			Log2		STL	Single_Cell_Data	NONE-NoTFA	Tchourine_2018	ALL	0.1	3822	49	0.0227974	2918	0
Figure_5b			Log2		STL	Single_Cell_Data	NONE-NoTFA	Tchourine_2018	ALL	0.1	3822	50	0.025678	2722	33
Figure_5b			Log2		STL	Single_Cell_Data	NONE-NoTFA	Tchourine_2018	ALL	0.1	3822	51	0.0229236	2778	0
Figure_5b			Log2		STL	Single_Cell_Data	NONE-NoTFA	Tchourine_2018	ALL	0.1	3822	52	0.0287559	2738	54
Figure_5b			Log2		STL	Single_Cell_Data	NONE-NoTFA	Tchourine_2018	ALL	0.1	3822	53	0.0224577	2687	51
Figure_5b			Log2		STL	Single_Cell_Data	NONE-NoTFA	Tchourine_2018	ALL	0.1	3822	54	0.024376	2790	36
Figure_5b			Log2		STL	Single_Cell_Data	NONE-NoTFA	Tchourine_2018	ALL	0.1	3822	55	0.0275082	2755	0
Figure_5b			Log2		STL	Single_Cell_Data	NONE-NoTFA	Tchourine_2018	ALL	0.1	3822	56	0.0196427	2860	0
Figure_5b			Log2		STL	Single_Cell_Data	NONE-NoTFA	Tchourine_2018	ALL	0.1	3822	57	0.0289333	2740	35
Figure_5b			Log2		STL	Single_Cell_Data	NONE-NoTFA	Tchourine_2018	ALL	0.1	3822	58	0.0232234	2553	0
Figure_5b			Log2		STL	Single_Cell_Data	NONE-NoTFA	Tchourine_2018	ALL	0.1	3822	59	0.0277686	2648	32
Figure_5b			Log2		STL	Single_Cell_Data	NONE-NoTFA	Tchourine_2018	ALL	0.1	3822	60	0.0232903	2647	48
Figure_5b			Log2		STL	Single_Cell_Data	NONE-NoTFA	Tchourine_2018	ALL	0.1	3822	61	0.0259598	2921	33
Figure_5b			Log2		STL	Single_Cell_Data	NONE-NoTFA	Tchourine_2018	ALL	0.25	9556	42	0.0299809	3924	0
Figure_5b			Log2		STL	Single_Cell_Data	NONE-NoTFA	Tchourine_2018	ALL	0.25	9556	43	0.0218707	3799	0
Figure_5b			Log2		STL	Single_Cell_Data	NONE-NoTFA	Tchourine_2018	ALL	0.25	9556	44	0.023231	3826	24
Figure_5b			Log2		STL	Single_Cell_Data	NONE-NoTFA	Tchourine_2018	ALL	0.25	9556	45	0.0269231	3820	0
Figure_5b			Log2		STL	Single_Cell_Data	NONE-NoTFA	Tchourine_2018	ALL	0.25	9556	46	0.0303286	3635	81
Figure_5b			Log2		STL	Single_Cell_Data	NONE-NoTFA	Tchourine_2018	ALL	0.25	9556	47	0.0236042	3598	0
Figure_5b			Log2		STL	Single_Cell_Data	NONE-NoTFA	Tchourine_2018	ALL	0.25	9556	48	0.0222496	3758	0
Figure_5b			Log2		STL	Single_Cell_Data	NONE-NoTFA	Tchourine_2018	ALL	0.25	9556	49	0.0243706	3581	0
Figure_5b			Log2		STL	Single_Cell_Data	NONE-NoTFA	Tchourine_2018	ALL	0.25	9556	50	0.0281994	3673	44
Figure_5b			Log2		STL	Single_Cell_Data	NONE-NoTFA	Tchourine_2018	ALL	0.25	9556	51	0.025568	3833	0
Figure_5b			Log2		STL	Single_Cell_Data	NONE-NoTFA	Tchourine_2018	ALL	0.25	9556	52	0.0288624	3740	64
Figure_5b			Log2		STL	Single_Cell_Data	NONE-NoTFA	Tchourine_2018	ALL	0.25	9556	53	0.0237614	3619	50
Figure_5b			Log2		STL	Single_Cell_Data	NONE-NoTFA	Tchourine_2018	ALL	0.25	9556	54	0.0287966	3625	36
Figure_5b			Log2		STL	Single_Cell_Data	NONE-NoTFA	Tchourine_2018	ALL	0.25	9556	55	0.0265457	3691	0
Figure_5b			Log2		STL	Single_Cell_Data	NONE-NoTFA	Tchourine_2018	ALL	0.25	9556	56	0.0216797	3770	0
Figure_5b			Log2		STL	Single_Cell_Data	NONE-NoTFA	Tchourine_2018	ALL	0.25	9556	57	0.0247529	3710	0
Figure_5b			Log2		STL	Single_Cell_Data	NONE-NoTFA	Tchourine_2018	ALL	0.25	9556	58	0.0239162	3672	0
Figure_5b			Log2		STL	Single_Cell_Data	NONE-NoTFA	Tchourine_2018	ALL	0.25	9556	59	0.026196	3692	24
Figure_5b			Log2		STL	Single_Cell_Data	NONE-NoTFA	Tchourine_2018	ALL	0.25	9556	60	0.0267377	3757	0
Figure_5b			Log2		STL	Single_Cell_Data	NONE-NoTFA	Tchourine_2018	ALL	0.25	9556	61	0.0266461	3883	31
Figure_5b			Log2		STL	Single_Cell_Data	NONE-NoTFA	Tchourine_2018	ALL	0.5	19112	42	0.0299346	4300	0
Figure_5b			Log2		STL	Single_Cell_Data	NONE-NoTFA	Tchourine_2018	ALL	0.5	19112	43	0.0199046	4253	0
Figure_5b			Log2		STL	Single_Cell_Data	NONE-NoTFA	Tchourine_2018	ALL	0.5	19112	44	0.0230119	4305	0
Figure_5b			Log2		STL	Single_Cell_Data	NONE-NoTFA	Tchourine_2018	ALL	0.5	19112	45	0.0271091	4363	0
Figure_5b			Log2		STL	Single_Cell_Data	NONE-NoTFA	Tchourine_2018	ALL	0.5	19112	46	0.030466	4248	81
Figure_5b			Log2		STL	Single_Cell_Data	NONE-NoTFA	Tchourine_2018	ALL	0.5	19112	47	0.0228943	4241	0
Figure_5b			Log2		STL	Single_Cell_Data	NONE-NoTFA	Tchourine_2018	ALL	0.5	19112	48	0.0243254	4344	0
Figure_5b			Log2		STL	Single_Cell_Data	NONE-NoTFA	Tchourine_2018	ALL	0.5	19112	49	0.0252952	4208	0
Figure_5b			Log2		STL	Single_Cell_Data	NONE-NoTFA	Tchourine_2018	ALL	0.5	19112	50	0.0284053	4244	46
Figure_5b			Log2		STL	Single_Cell_Data	NONE-NoTFA	Tchourine_2018	ALL	0.5	19112	51	0.0266294	4370	0
Figure_5b			Log2		STL	Single_Cell_Data	NONE-NoTFA	Tchourine_2018	ALL	0.5	19112	52	0.0285081	4302	43
Figure_5b			Log2		STL	Single_Cell_Data	NONE-NoTFA	Tchourine_2018	ALL	0.5	19112	53	0.0236005	4204	52
Figure_5b			Log2		STL	Single_Cell_Data	NONE-NoTFA	Tchourine_2018	ALL	0.5	19112	54	0.0244892	4308	38
Figure_5b			Log2		STL	Single_Cell_Data	NONE-NoTFA	Tchourine_2018	ALL	0.5	19112	55	0.0258693	4268	0
Figure_5b			Log2		STL	Single_Cell_Data	NONE-NoTFA	Tchourine_2018	ALL	0.5	19112	56	0.0226766	4367	0
Figure_5b			Log2		STL	Single_Cell_Data	NONE-NoTFA	Tchourine_2018	ALL	0.5	19112	57	0.028624	4316	0
Figure_5b			Log2		STL	Single_Cell_Data	NONE-NoTFA	Tchourine_2018	ALL	0.5	19112	58	0.0226793	4300	0
Figure_5b			Log2		STL	Single_Cell_Data	NONE-NoTFA	Tchourine_2018	ALL	0.5	19112	59	0.0256394	4281	29
Figure_5b			Log2		STL	Single_Cell_Data	NONE-NoTFA	Tchourine_2018	ALL	0.5	19112	60	0.0249958	4365	55
Figure_5b			Log2		STL	Single_Cell_Data	NONE-NoTFA	Tchourine_2018	ALL	0.5	19112	61	0.0253591	4350	28
Figure_5b			Log2		STL	Single_Cell_Data	NONE-NoTFA	Tchourine_2018	ALL	0.75	28668	42	0.028958	4585	0
Figure_5b			Log2		STL	Single_Cell_Data	NONE-NoTFA	Tchourine_2018	ALL	0.75	28668	43	0.0197081	4451	0
Figure_5b			Log2		STL	Single_Cell_Data	NONE-NoTFA	Tchourine_2018	ALL	0.75	28668	44	0.0230585	4620	19
Figure_5b			Log2		STL	Single_Cell_Data	NONE-NoTFA	Tchourine_2018	ALL	0.75	28668	45	0.0271952	4562	0
Figure_5b			Log2		STL	Single_Cell_Data	NONE-NoTFA	Tchourine_2018	ALL	0.75	28668	46	0.0304962	4562	80
Figure_5b			Log2		STL	Single_Cell_Data	NONE-NoTFA	Tchourine_2018	ALL	0.75	28668	47	0.023177	4540	0
Figure_5b			Log2		STL	Single_Cell_Data	NONE-NoTFA	Tchourine_2018	ALL	0.75	28668	48	0.0238931	4610	0
Figure_5b			Log2		STL	Single_Cell_Data	NONE-NoTFA	Tchourine_2018	ALL	0.75	28668	49	0.0254217	4378	0
Figure_5b			Log2		STL	Single_Cell_Data	NONE-NoTFA	Tchourine_2018	ALL	0.75	28668	50	0.0255182	4455	40
Figure_5b			Log2		STL	Single_Cell_Data	NONE-NoTFA	Tchourine_2018	ALL	0.75	28668	51	0.0273537	4576	0
Figure_5b			Log2		STL	Single_Cell_Data	NONE-NoTFA	Tchourine_2018	ALL	0.75	28668	52	0.0284707	4534	62
Figure_5b			Log2		STL	Single_Cell_Data	NONE-NoTFA	Tchourine_2018	ALL	0.75	28668	53	0.023463	4527	49
Figure_5b			Log2		STL	Single_Cell_Data	NONE-NoTFA	Tchourine_2018	ALL	0.75	28668	54	0.0279468	4467	37
Figure_5b			Log2		STL	Single_Cell_Data	NONE-NoTFA	Tchourine_2018	ALL	0.75	28668	55	0.0260122	4529	0
Figure_5b			Log2		STL	Single_Cell_Data	NONE-NoTFA	Tchourine_2018	ALL	0.75	28668	56	0.020304	4516	0
Figure_5b			Log2		STL	Single_Cell_Data	NONE-NoTFA	Tchourine_2018	ALL	0.75	28668	57	0.0277932	4571	0
Figure_5b			Log2		STL	Single_Cell_Data	NONE-NoTFA	Tchourine_2018	ALL	0.75	28668	58	0.0225635	4593	0
Figure_5b			Log2		STL	Single_Cell_Data	NONE-NoTFA	Tchourine_2018	ALL	0.75	28668	59	0.0257015	4461	29
Figure_5b			Log2		STL	Single_Cell_Data	NONE-NoTFA	Tchourine_2018	ALL	0.75	28668	60	0.0251239	4515	54
Figure_5b			Log2		STL	Single_Cell_Data	NONE-NoTFA	Tchourine_2018	ALL	0.75	28668	61	0.0272068	4543	31
Figure_5b			Log2		STL	Single_Cell_Data	NONE-NoTFA	Tchourine_2018	ALL	1	38225	42	0.0261989	4615	0
Figure_5b			Log2		STL	Single_Cell_Data	NONE-NoTFA	Tchourine_2018	ALL	1	38225	43	0.0192994	4669	0
Figure_5b			Log2		STL	Single_Cell_Data	NONE-NoTFA	Tchourine_2018	ALL	1	38225	44	0.0229642	4692	0
Figure_5b			Log2		STL	Single_Cell_Data	NONE-NoTFA	Tchourine_2018	ALL	1	38225	45	0.0272629	4655	0
Figure_5b			Log2		STL	Single_Cell_Data	NONE-NoTFA	Tchourine_2018	ALL	1	38225	46	0.031415	4612	77
Figure_5b			Log2		STL	Single_Cell_Data	NONE-NoTFA	Tchourine_2018	ALL	1	38225	47	0.0234088	4670	0
Figure_5b			Log2		STL	Single_Cell_Data	NONE-NoTFA	Tchourine_2018	ALL	1	38225	48	0.0223433	4634	0
Figure_5b			Log2		STL	Single_Cell_Data	NONE-NoTFA	Tchourine_2018	ALL	1	38225	49	0.0246177	4641	0
Figure_5b			Log2		STL	Single_Cell_Data	NONE-NoTFA	Tchourine_2018	ALL	1	38225	50	0.0256476	4647	41
Figure_5b			Log2		STL	Single_Cell_Data	NONE-NoTFA	Tchourine_2018	ALL	1	38225	51	0.0239194	4649	0
Figure_5b			Log2		STL	Single_Cell_Data	NONE-NoTFA	Tchourine_2018	ALL	1	38225	52	0.0279422	4659	60
Figure_5b			Log2		STL	Single_Cell_Data	NONE-NoTFA	Tchourine_2018	ALL	1	38225	53	0.0230314	4639	51
Figure_5b			Log2		STL	Single_Cell_Data	NONE-NoTFA	Tchourine_2018	ALL	1	38225	54	0.0251292	4679	37
Figure_5b			Log2		STL	Single_Cell_Data	NONE-NoTFA	Tchourine_2018	ALL	1	38225	55	0.0262479	4653	0
Figure_5b			Log2		STL	Single_Cell_Data	NONE-NoTFA	Tchourine_2018	ALL	1	38225	56	0.0199834	4665	0
Figure_5b			Log2		STL	Single_Cell_Data	NONE-NoTFA	Tchourine_2018	ALL	1	38225	57	0.0240897	4675	0
Figure_5b			Log2		STL	Single_Cell_Data	NONE-NoTFA	Tchourine_2018	ALL	1	38225	58	0.0223393	4684	0
Figure_5b			Log2		STL	Single_Cell_Data	NONE-NoTFA	Tchourine_2018	ALL	1	38225	59	0.0259972	4673	29
Figure_5b			Log2		STL	Single_Cell_Data	NONE-NoTFA	Tchourine_2018	ALL	1	38225	60	0.0247333	4637	0
Figure_5b			Log2		STL	Single_Cell_Data	NONE-NoTFA	Tchourine_2018	ALL	1	38225	61	0.0244508	4643	45
Figure_5b			Log2		STL	Single_Cell_Data		Tchourine_2018	ALL	0.01	382	42	0.137858	859	734
Figure_5b			Log2		STL	Single_Cell_Data		Tchourine_2018	ALL	0.01	382	43	0.147773	964	902
Figure_5b			Log2		STL	Single_Cell_Data		Tchourine_2018	ALL	0.01	382	44	0.163748	874	1094
Figure_5b			Log2		STL	Single_Cell_Data		Tchourine_2018	ALL	0.01	382	45	0.134333	824	887
Figure_5b			Log2		STL	Single_Cell_Data		Tchourine_2018	ALL	0.01	382	46	0.14348	798	761
Figure_5b			Log2		STL	Single_Cell_Data		Tchourine_2018	ALL	0.01	382	47	0.179906	905	1154
Figure_5b			Log2		STL	Single_Cell_Data		Tchourine_2018	ALL	0.01	382	48	0.168681	906	1006
Figure_5b			Log2		STL	Single_Cell_Data		Tchourine_2018	ALL	0.01	382	49	0.130051	851	650
Figure_5b			Log2		STL	Single_Cell_Data		Tchourine_2018	ALL	0.01	382	50	0.132746	937	664
Figure_5b			Log2		STL	Single_Cell_Data		Tchourine_2018	ALL	0.01	382	51	0.161952	895	807
Figure_5b			Log2		STL	Single_Cell_Data		Tchourine_2018	ALL	0.01	382	52	0.152486	797	688
Figure_5b			Log2		STL	Single_Cell_Data		Tchourine_2018	ALL	0.01	382	53	0.169231	881	1106
Figure_5b			Log2		STL	Single_Cell_Data		Tchourine_2018	ALL	0.01	382	54	0.146033	876	749
Figure_5b			Log2		STL	Single_Cell_Data		Tchourine_2018	ALL	0.01	382	55	0.16832	871	914
Figure_5b			Log2		STL	Single_Cell_Data		Tchourine_2018	ALL	0.01	382	56	0.162156	915	949
Figure_5b			Log2		STL	Single_Cell_Data		Tchourine_2018	ALL	0.01	382	57	0.167074	901	982
Figure_5b			Log2		STL	Single_Cell_Data		Tchourine_2018	ALL	0.01	382	58	0.15934	977	991
Figure_5b			Log2		STL	Single_Cell_Data		Tchourine_2018	ALL	0.01	382	59	0.177887	870	965
Figure_5b			Log2		STL	Single_Cell_Data		Tchourine_2018	ALL	0.01	382	60	0.173428	844	1146
Figure_5b			Log2		STL	Single_Cell_Data		Tchourine_2018	ALL	0.01	382	61	0.188423	918	1241
Figure_5b			Log2		STL	Single_Cell_Data		Tchourine_2018	ALL	0.025	955	42	0.163466	1666	902
Figure_5b			Log2		STL	Single_Cell_Data		Tchourine_2018	ALL	0.025	955	43	0.168826	1719	1106
Figure_5b			Log2		STL	Single_Cell_Data		Tchourine_2018	ALL	0.025	955	44	0.192506	1811	969
Figure_5b			Log2		STL	Single_Cell_Data		Tchourine_2018	ALL	0.025	955	45	0.15078	1669	885
Figure_5b			Log2		STL	Single_Cell_Data		Tchourine_2018	ALL	0.025	955	46	0.174066	1585	1065
Figure_5b			Log2		STL	Single_Cell_Data		Tchourine_2018	ALL	0.025	955	47	0.194732	1826	1086
Figure_5b			Log2		STL	Single_Cell_Data		Tchourine_2018	ALL	0.025	955	48	0.186647	1682	1001
Figure_5b			Log2		STL	Single_Cell_Data		Tchourine_2018	ALL	0.025	955	49	0.152349	1675	619
Figure_5b			Log2		STL	Single_Cell_Data		Tchourine_2018	ALL	0.025	955	50	0.151015	1803	779
Figure_5b			Log2		STL	Single_Cell_Data		Tchourine_2018	ALL	0.025	955	51	0.184204	1762	1004
Figure_5b			Log2		STL	Single_Cell_Data		Tchourine_2018	ALL	0.025	955	52	0.186595	1544	1029
Figure_5b			Log2		STL	Single_Cell_Data		Tchourine_2018	ALL	0.025	955	53	0.196428	1578	1246
Figure_5b			Log2		STL	Single_Cell_Data		Tchourine_2018	ALL	0.025	955	54	0.174283	1635	856
Figure_5b			Log2		STL	Single_Cell_Data		Tchourine_2018	ALL	0.025	955	55	0.182604	1647	904
Figure_5b			Log2		STL	Single_Cell_Data		Tchourine_2018	ALL	0.025	955	56	0.180973	1612	1059
Figure_5b			Log2		STL	Single_Cell_Data		Tchourine_2018	ALL	0.025	955	57	0.189277	1675	958
Figure_5b			Log2		STL	Single_Cell_Data		Tchourine_2018	ALL	0.025	955	58	0.16857	1860	922
Figure_5b			Log2		STL	Single_Cell_Data		Tchourine_2018	ALL	0.025	955	59	0.19622	1643	1160
Figure_5b			Log2		STL	Single_Cell_Data		Tchourine_2018	ALL	0.025	955	60	0.195792	1744	1306
Figure_5b			Log2		STL	Single_Cell_Data		Tchourine_2018	ALL	0.025	955	61	0.211193	1835	1171
Figure_5b			Log2		STL	Single_Cell_Data		Tchourine_2018	ALL	0.05	1911	42	0.17668	2667	947
Figure_5b			Log2		STL	Single_Cell_Data		Tchourine_2018	ALL	0.05	1911	43	0.175284	2712	1040
Figure_5b			Log2		STL	Single_Cell_Data		Tchourine_2018	ALL	0.05	1911	44	0.209039	2738	1160
Figure_5b			Log2		STL	Single_Cell_Data		Tchourine_2018	ALL	0.05	1911	45	0.161885	2686	1020
Figure_5b			Log2		STL	Single_Cell_Data		Tchourine_2018	ALL	0.05	1911	46	0.181671	2602	1022
Figure_5b			Log2		STL	Single_Cell_Data		Tchourine_2018	ALL	0.05	1911	47	0.203088	3009	1077
Figure_5b			Log2		STL	Single_Cell_Data		Tchourine_2018	ALL	0.05	1911	48	0.193465	2651	1090
Figure_5b			Log2		STL	Single_Cell_Data		Tchourine_2018	ALL	0.05	1911	49	0.167161	2789	772
Figure_5b			Log2		STL	Single_Cell_Data		Tchourine_2018	ALL	0.05	1911	50	0.168172	2835	950
Figure_5b			Log2		STL	Single_Cell_Data		Tchourine_2018	ALL	0.05	1911	51	0.195981	2646	1216
Figure_5b			Log2		STL	Single_Cell_Data		Tchourine_2018	ALL	0.05	1911	52	0.188166	2500	957
Figure_5b			Log2		STL	Single_Cell_Data		Tchourine_2018	ALL	0.05	1911	53	0.208478	2511	1201
Figure_5b			Log2		STL	Single_Cell_Data		Tchourine_2018	ALL	0.05	1911	54	0.181112	2620	910
Figure_5b			Log2		STL	Single_Cell_Data		Tchourine_2018	ALL	0.05	1911	55	0.197133	2805	973
Figure_5b			Log2		STL	Single_Cell_Data		Tchourine_2018	ALL	0.05	1911	56	0.202256	2641	1118
Figure_5b			Log2		STL	Single_Cell_Data		Tchourine_2018	ALL	0.05	1911	57	0.193847	2658	945
Figure_5b			Log2		STL	Single_Cell_Data		Tchourine_2018	ALL	0.05	1911	58	0.181435	2788	988
Figure_5b			Log2		STL	Single_Cell_Data		Tchourine_2018	ALL	0.05	1911	59	0.211538	2669	1265
Figure_5b			Log2		STL	Single_Cell_Data		Tchourine_2018	ALL	0.05	1911	60	0.210428	2583	1133
Figure_5b			Log2		STL	Single_Cell_Data		Tchourine_2018	ALL	0.05	1911	61	0.219179	2959	1103
Figure_5b			Log2		STL	Single_Cell_Data		Tchourine_2018	ALL	0.1	3822	42	0.18474	4248	923
Figure_5b			Log2		STL	Single_Cell_Data		Tchourine_2018	ALL	0.1	3822	43	0.184337	4232	1076
Figure_5b			Log2		STL	Single_Cell_Data		Tchourine_2018	ALL	0.1	3822	44	0.20932	4109	1221
Figure_5b			Log2		STL	Single_Cell_Data		Tchourine_2018	ALL	0.1	3822	45	0.168161	4143	922
Figure_5b			Log2		STL	Single_Cell_Data		Tchourine_2018	ALL	0.1	3822	46	0.189074	3955	957
Figure_5b			Log2		STL	Single_Cell_Data		Tchourine_2018	ALL	0.1	3822	47	0.207587	4436	1065
Figure_5b			Log2		STL	Single_Cell_Data		Tchourine_2018	ALL	0.1	3822	48	0.197251	4148	1028
Figure_5b			Log2		STL	Single_Cell_Data		Tchourine_2018	ALL	0.1	3822	49	0.182357	4340	857
Figure_5b			Log2		STL	Single_Cell_Data		Tchourine_2018	ALL	0.1	3822	50	0.177487	4160	916
Figure_5b			Log2		STL	Single_Cell_Data		Tchourine_2018	ALL	0.1	3822	51	0.199235	4127	974
Figure_5b			Log2		STL	Single_Cell_Data		Tchourine_2018	ALL	0.1	3822	52	0.189849	3949	880
Figure_5b			Log2		STL	Single_Cell_Data		Tchourine_2018	ALL	0.1	3822	53	0.218001	3927	1183
Figure_5b			Log2		STL	Single_Cell_Data		Tchourine_2018	ALL	0.1	3822	54	0.184676	4015	810
Figure_5b			Log2		STL	Single_Cell_Data		Tchourine_2018	ALL	0.1	3822	55	0.1993	4084	1009
Figure_5b			Log2		STL	Single_Cell_Data		Tchourine_2018	ALL	0.1	3822	56	0.21804	4021	1167
Figure_5b			Log2		STL	Single_Cell_Data		Tchourine_2018	ALL	0.1	3822	57	0.207229	4032	1003
Figure_5b			Log2		STL	Single_Cell_Data		Tchourine_2018	ALL	0.1	3822	58	0.185611	4360	946
Figure_5b			Log2		STL	Single_Cell_Data		Tchourine_2018	ALL	0.1	3822	59	0.218767	4224	1263
Figure_5b			Log2		STL	Single_Cell_Data		Tchourine_2018	ALL	0.1	3822	60	0.213083	4049	1090
Figure_5b			Log2		STL	Single_Cell_Data		Tchourine_2018	ALL	0.1	3822	61	0.221769	4319	1153
Figure_5b			Log2		STL	Single_Cell_Data		Tchourine_2018	ALL	0.25	9556	42	0.189456	5865	894
Figure_5b			Log2		STL	Single_Cell_Data		Tchourine_2018	ALL	0.25	9556	43	0.18996	5867	1068
Figure_5b			Log2		STL	Single_Cell_Data		Tchourine_2018	ALL	0.25	9556	44	0.214155	5804	1218
Figure_5b			Log2		STL	Single_Cell_Data		Tchourine_2018	ALL	0.25	9556	45	0.168256	5865	832
Figure_5b			Log2		STL	Single_Cell_Data		Tchourine_2018	ALL	0.25	9556	46	0.187838	5646	1027
Figure_5b			Log2		STL	Single_Cell_Data		Tchourine_2018	ALL	0.25	9556	47	0.205817	6182	957
Figure_5b			Log2		STL	Single_Cell_Data		Tchourine_2018	ALL	0.25	9556	48	0.204462	6061	1119
Figure_5b			Log2		STL	Single_Cell_Data		Tchourine_2018	ALL	0.25	9556	49	0.178577	5810	807
Figure_5b			Log2		STL	Single_Cell_Data		Tchourine_2018	ALL	0.25	9556	50	0.179054	5664	778
Figure_5b			Log2		STL	Single_Cell_Data		Tchourine_2018	ALL	0.25	9556	51	0.204028	5762	1030
Figure_5b			Log2		STL	Single_Cell_Data		Tchourine_2018	ALL	0.25	9556	52	0.191799	5651	811
Figure_5b			Log2		STL	Single_Cell_Data		Tchourine_2018	ALL	0.25	9556	53	0.226473	5551	1172
Figure_5b			Log2		STL	Single_Cell_Data		Tchourine_2018	ALL	0.25	9556	54	0.188304	5753	796
Figure_5b			Log2		STL	Single_Cell_Data		Tchourine_2018	ALL	0.25	9556	55	0.194885	5704	931
Figure_5b			Log2		STL	Single_Cell_Data		Tchourine_2018	ALL	0.25	9556	56	0.216435	5745	1094
Figure_5b			Log2		STL	Single_Cell_Data		Tchourine_2018	ALL	0.25	9556	57	0.206447	5758	966
Figure_5b			Log2		STL	Single_Cell_Data		Tchourine_2018	ALL	0.25	9556	58	0.186678	6133	883
Figure_5b			Log2		STL	Single_Cell_Data		Tchourine_2018	ALL	0.25	9556	59	0.226668	5683	1179
Figure_5b			Log2		STL	Single_Cell_Data		Tchourine_2018	ALL	0.25	9556	60	0.215832	5648	1076
Figure_5b			Log2		STL	Single_Cell_Data		Tchourine_2018	ALL	0.25	9556	61	0.218313	5857	1146
Figure_5b			Log2		STL	Single_Cell_Data		Tchourine_2018	ALL	0.5	19112	42	0.191997	6553	957
Figure_5b			Log2		STL	Single_Cell_Data		Tchourine_2018	ALL	0.5	19112	43	0.194078	6609	961
Figure_5b			Log2		STL	Single_Cell_Data		Tchourine_2018	ALL	0.5	19112	44	0.217474	6492	1176
Figure_5b			Log2		STL	Single_Cell_Data		Tchourine_2018	ALL	0.5	19112	45	0.167634	6526	811
Figure_5b			Log2		STL	Single_Cell_Data		Tchourine_2018	ALL	0.5	19112	46	0.191304	6317	930
Figure_5b			Log2		STL	Single_Cell_Data		Tchourine_2018	ALL	0.5	19112	47	0.206451	6826	948
Figure_5b			Log2		STL	Single_Cell_Data		Tchourine_2018	ALL	0.5	19112	48	0.202873	6850	1057
Figure_5b			Log2		STL	Single_Cell_Data		Tchourine_2018	ALL	0.5	19112	49	0.176422	6493	781
Figure_5b			Log2		STL	Single_Cell_Data		Tchourine_2018	ALL	0.5	19112	50	0.176355	6439	742
Figure_5b			Log2		STL	Single_Cell_Data		Tchourine_2018	ALL	0.5	19112	51	0.202772	6478	953
Figure_5b			Log2		STL	Single_Cell_Data		Tchourine_2018	ALL	0.5	19112	52	0.187461	6358	750
Figure_5b			Log2		STL	Single_Cell_Data		Tchourine_2018	ALL	0.5	19112	53	0.227833	6202	1066
Figure_5b			Log2		STL	Single_Cell_Data		Tchourine_2018	ALL	0.5	19112	54	0.192435	6558	829
Figure_5b			Log2		STL	Single_Cell_Data		Tchourine_2018	ALL	0.5	19112	55	0.199768	6395	961
Figure_5b			Log2		STL	Single_Cell_Data		Tchourine_2018	ALL	0.5	19112	56	0.221351	6587	1137
Figure_5b			Log2		STL	Single_Cell_Data		Tchourine_2018	ALL	0.5	19112	57	0.211913	6570	985
Figure_5b			Log2		STL	Single_Cell_Data		Tchourine_2018	ALL	0.5	19112	58	0.189574	6794	809
Figure_5b			Log2		STL	Single_Cell_Data		Tchourine_2018	ALL	0.5	19112	59	0.22918	6417	1121
Figure_5b			Log2		STL	Single_Cell_Data		Tchourine_2018	ALL	0.5	19112	60	0.217603	6343	1012
Figure_5b			Log2		STL	Single_Cell_Data		Tchourine_2018	ALL	0.5	19112	61	0.216068	6552	1097
Figure_5b			Log2		STL	Single_Cell_Data		Tchourine_2018	ALL	0.75	28668	42	0.193469	6872	956
Figure_5b			Log2		STL	Single_Cell_Data		Tchourine_2018	ALL	0.75	28668	43	0.191341	6936	929
Figure_5b			Log2		STL	Single_Cell_Data		Tchourine_2018	ALL	0.75	28668	44	0.21663	6822	1170
Figure_5b			Log2		STL	Single_Cell_Data		Tchourine_2018	ALL	0.75	28668	45	0.168973	6856	798
Figure_5b			Log2		STL	Single_Cell_Data		Tchourine_2018	ALL	0.75	28668	46	0.19565	6545	1033
Figure_5b			Log2		STL	Single_Cell_Data		Tchourine_2018	ALL	0.75	28668	47	0.207258	7109	938
Figure_5b			Log2		STL	Single_Cell_Data		Tchourine_2018	ALL	0.75	28668	48	0.200803	7205	1022
Figure_5b			Log2		STL	Single_Cell_Data		Tchourine_2018	ALL	0.75	28668	49	0.171691	6747	764
Figure_5b			Log2		STL	Single_Cell_Data		Tchourine_2018	ALL	0.75	28668	50	0.177254	6748	710
Figure_5b			Log2		STL	Single_Cell_Data		Tchourine_2018	ALL	0.75	28668	51	0.20254	6794	926
Figure_5b			Log2		STL	Single_Cell_Data		Tchourine_2018	ALL	0.75	28668	52	0.190058	6637	777
Figure_5b			Log2		STL	Single_Cell_Data		Tchourine_2018	ALL	0.75	28668	53	0.224789	6542	1031
Figure_5b			Log2		STL	Single_Cell_Data		Tchourine_2018	ALL	0.75	28668	54	0.19127	6892	765
Figure_5b			Log2		STL	Single_Cell_Data		Tchourine_2018	ALL	0.75	28668	55	0.197339	6727	920
Figure_5b			Log2		STL	Single_Cell_Data		Tchourine_2018	ALL	0.75	28668	56	0.21657	6935	1089
Figure_5b			Log2		STL	Single_Cell_Data		Tchourine_2018	ALL	0.75	28668	57	0.208777	6915	982
Figure_5b			Log2		STL	Single_Cell_Data		Tchourine_2018	ALL	0.75	28668	58	0.193725	7272	834
Figure_5b			Log2		STL	Single_Cell_Data		Tchourine_2018	ALL	0.75	28668	59	0.223534	6796	1079
Figure_5b			Log2		STL	Single_Cell_Data		Tchourine_2018	ALL	0.75	28668	60	0.213582	6709	969
Figure_5b			Log2		STL	Single_Cell_Data		Tchourine_2018	ALL	0.75	28668	61	0.21654	6833	1079
Figure_5b			Log2		STL	Single_Cell_Data		Tchourine_2018	ALL	1	38225	42	0.19182	7099	941
Figure_5b			Log2		STL	Single_Cell_Data		Tchourine_2018	ALL	1	38225	43	0.193178	7165	950
Figure_5b			Log2		STL	Single_Cell_Data		Tchourine_2018	ALL	1	38225	44	0.218051	6957	1108
Figure_5b			Log2		STL	Single_Cell_Data		Tchourine_2018	ALL	1	38225	45	0.166292	7026	763
Figure_5b			Log2		STL	Single_Cell_Data		Tchourine_2018	ALL	1	38225	46	0.195412	6741	1034
Figure_5b			Log2		STL	Single_Cell_Data		Tchourine_2018	ALL	1	38225	47	0.207105	7364	936
Figure_5b			Log2		STL	Single_Cell_Data		Tchourine_2018	ALL	1	38225	48	0.200316	7334	1034
Figure_5b			Log2		STL	Single_Cell_Data		Tchourine_2018	ALL	1	38225	49	0.17243	6991	771
Figure_5b			Log2		STL	Single_Cell_Data		Tchourine_2018	ALL	1	38225	50	0.178266	6866	721
Figure_5b			Log2		STL	Single_Cell_Data		Tchourine_2018	ALL	1	38225	51	0.202119	6925	936
Figure_5b			Log2		STL	Single_Cell_Data		Tchourine_2018	ALL	1	38225	52	0.18762	6848	759
Figure_5b			Log2		STL	Single_Cell_Data		Tchourine_2018	ALL	1	38225	53	0.226727	6765	1048
Figure_5b			Log2		STL	Single_Cell_Data		Tchourine_2018	ALL	1	38225	54	0.19165	7158	779
Figure_5b			Log2		STL	Single_Cell_Data		Tchourine_2018	ALL	1	38225	55	0.196575	6936	918
Figure_5b			Log2		STL	Single_Cell_Data		Tchourine_2018	ALL	1	38225	56	0.215776	7159	1129
Figure_5b			Log2		STL	Single_Cell_Data		Tchourine_2018	ALL	1	38225	57	0.212257	7005	933
Figure_5b			Log2		STL	Single_Cell_Data		Tchourine_2018	ALL	1	38225	58	0.195821	7426	806
Figure_5b			Log2		STL	Single_Cell_Data		Tchourine_2018	ALL	1	38225	59	0.226293	6901	1075
Figure_5b			Log2		STL	Single_Cell_Data		Tchourine_2018	ALL	1	38225	60	0.219448	6922	1001
Figure_5b			Log2		STL	Single_Cell_Data		Tchourine_2018	ALL	1	38225	61	0.212899	6923	1039
Figure_5b			Log2		STL	Single_Cell_Data	YEASTRACT_2019	Tchourine_2018	ALL	0.01	382	42	0.0919098	907	545
Figure_5b			Log2		STL	Single_Cell_Data	YEASTRACT_2019	Tchourine_2018	ALL	0.01	382	43	0.0908145	973	222
Figure_5b			Log2		STL	Single_Cell_Data	YEASTRACT_2019	Tchourine_2018	ALL	0.01	382	44	0.104554	1013	814
Figure_5b			Log2		STL	Single_Cell_Data	YEASTRACT_2019	Tchourine_2018	ALL	0.01	382	45	0.0936039	913	650
Figure_5b			Log2		STL	Single_Cell_Data	YEASTRACT_2019	Tchourine_2018	ALL	0.01	382	46	0.107836	905	1141
Figure_5b			Log2		STL	Single_Cell_Data	YEASTRACT_2019	Tchourine_2018	ALL	0.01	382	47	0.085262	973	286
Figure_5b			Log2		STL	Single_Cell_Data	YEASTRACT_2019	Tchourine_2018	ALL	0.01	382	48	0.0968007	1054	0
Figure_5b			Log2		STL	Single_Cell_Data	YEASTRACT_2019	Tchourine_2018	ALL	0.01	382	49	0.0765574	1017	253
Figure_5b			Log2		STL	Single_Cell_Data	YEASTRACT_2019	Tchourine_2018	ALL	0.01	382	50	0.117473	1050	955
Figure_5b			Log2		STL	Single_Cell_Data	YEASTRACT_2019	Tchourine_2018	ALL	0.01	382	51	0.111659	1004	655
Figure_5b			Log2		STL	Single_Cell_Data	YEASTRACT_2019	Tchourine_2018	ALL	0.01	382	52	0.111671	1004	616
Figure_5b			Log2		STL	Single_Cell_Data	YEASTRACT_2019	Tchourine_2018	ALL	0.01	382	53	0.110599	1037	830
Figure_5b			Log2		STL	Single_Cell_Data	YEASTRACT_2019	Tchourine_2018	ALL	0.01	382	54	0.120337	984	1130
Figure_5b			Log2		STL	Single_Cell_Data	YEASTRACT_2019	Tchourine_2018	ALL	0.01	382	55	0.131793	958	1145
Figure_5b			Log2		STL	Single_Cell_Data	YEASTRACT_2019	Tchourine_2018	ALL	0.01	382	56	0.0788515	1030	131
Figure_5b			Log2		STL	Single_Cell_Data	YEASTRACT_2019	Tchourine_2018	ALL	0.01	382	57	0.0944906	1011	276
Figure_5b			Log2		STL	Single_Cell_Data	YEASTRACT_2019	Tchourine_2018	ALL	0.01	382	58	0.11884	991	747
Figure_5b			Log2		STL	Single_Cell_Data	YEASTRACT_2019	Tchourine_2018	ALL	0.01	382	59	0.112711	987	698
Figure_5b			Log2		STL	Single_Cell_Data	YEASTRACT_2019	Tchourine_2018	ALL	0.01	382	60	0.112854	943	621
Figure_5b			Log2		STL	Single_Cell_Data	YEASTRACT_2019	Tchourine_2018	ALL	0.01	382	61	0.115834	1044	795
Figure_5b			Log2		STL	Single_Cell_Data	YEASTRACT_2019	Tchourine_2018	ALL	0.025	955	42	0.128841	1897	592
Figure_5b			Log2		STL	Single_Cell_Data	YEASTRACT_2019	Tchourine_2018	ALL	0.025	955	43	0.107677	2011	686
Figure_5b			Log2		STL	Single_Cell_Data	YEASTRACT_2019	Tchourine_2018	ALL	0.025	955	44	0.136593	1942	976
Figure_5b			Log2		STL	Single_Cell_Data	YEASTRACT_2019	Tchourine_2018	ALL	0.025	955	45	0.133458	1845	1195
Figure_5b			Log2		STL	Single_Cell_Data	YEASTRACT_2019	Tchourine_2018	ALL	0.025	955	46	0.140409	1827	1243
Figure_5b			Log2		STL	Single_Cell_Data	YEASTRACT_2019	Tchourine_2018	ALL	0.025	955	47	0.119424	1963	350
Figure_5b			Log2		STL	Single_Cell_Data	YEASTRACT_2019	Tchourine_2018	ALL	0.025	955	48	0.120748	2021	761
Figure_5b			Log2		STL	Single_Cell_Data	YEASTRACT_2019	Tchourine_2018	ALL	0.025	955	49	0.128534	1914	797
Figure_5b			Log2		STL	Single_Cell_Data	YEASTRACT_2019	Tchourine_2018	ALL	0.025	955	50	0.14329	1946	1126
Figure_5b			Log2		STL	Single_Cell_Data	YEASTRACT_2019	Tchourine_2018	ALL	0.025	955	51	0.130864	2048	884
Figure_5b			Log2		STL	Single_Cell_Data	YEASTRACT_2019	Tchourine_2018	ALL	0.025	955	52	0.126228	1904	714
Figure_5b			Log2		STL	Single_Cell_Data	YEASTRACT_2019	Tchourine_2018	ALL	0.025	955	53	0.121658	1889	1008
Figure_5b			Log2		STL	Single_Cell_Data	YEASTRACT_2019	Tchourine_2018	ALL	0.025	955	54	0.144327	1980	1122
Figure_5b			Log2		STL	Single_Cell_Data	YEASTRACT_2019	Tchourine_2018	ALL	0.025	955	55	0.149365	1909	946
Figure_5b			Log2		STL	Single_Cell_Data	YEASTRACT_2019	Tchourine_2018	ALL	0.025	955	56	0.11009	1926	185
Figure_5b			Log2		STL	Single_Cell_Data	YEASTRACT_2019	Tchourine_2018	ALL	0.025	955	57	0.131894	1950	961
Figure_5b			Log2		STL	Single_Cell_Data	YEASTRACT_2019	Tchourine_2018	ALL	0.025	955	58	0.154392	2029	1206
Figure_5b			Log2		STL	Single_Cell_Data	YEASTRACT_2019	Tchourine_2018	ALL	0.025	955	59	0.149487	1967	1212
Figure_5b			Log2		STL	Single_Cell_Data	YEASTRACT_2019	Tchourine_2018	ALL	0.025	955	60	0.142144	1986	808
Figure_5b			Log2		STL	Single_Cell_Data	YEASTRACT_2019	Tchourine_2018	ALL	0.025	955	61	0.144376	1985	856
Figure_5b			Log2		STL	Single_Cell_Data	YEASTRACT_2019	Tchourine_2018	ALL	0.05	1911	42	0.14584	2991	977
Figure_5b			Log2		STL	Single_Cell_Data	YEASTRACT_2019	Tchourine_2018	ALL	0.05	1911	43	0.117374	3087	1028
Figure_5b			Log2		STL	Single_Cell_Data	YEASTRACT_2019	Tchourine_2018	ALL	0.05	1911	44	0.151416	2951	1164
Figure_5b			Log2		STL	Single_Cell_Data	YEASTRACT_2019	Tchourine_2018	ALL	0.05	1911	45	0.155383	2941	1606
Figure_5b			Log2		STL	Single_Cell_Data	YEASTRACT_2019	Tchourine_2018	ALL	0.05	1911	46	0.164067	2971	1506
Figure_5b			Log2		STL	Single_Cell_Data	YEASTRACT_2019	Tchourine_2018	ALL	0.05	1911	47	0.128716	3145	510
Figure_5b			Log2		STL	Single_Cell_Data	YEASTRACT_2019	Tchourine_2018	ALL	0.05	1911	48	0.141874	3111	982
Figure_5b			Log2		STL	Single_Cell_Data	YEASTRACT_2019	Tchourine_2018	ALL	0.05	1911	49	0.144292	3030	1037
Figure_5b			Log2		STL	Single_Cell_Data	YEASTRACT_2019	Tchourine_2018	ALL	0.05	1911	50	0.158846	3144	1324
Figure_5b			Log2		STL	Single_Cell_Data	YEASTRACT_2019	Tchourine_2018	ALL	0.05	1911	51	0.14136	3054	999
Figure_5b			Log2		STL	Single_Cell_Data	YEASTRACT_2019	Tchourine_2018	ALL	0.05	1911	52	0.148666	2988	1056
Figure_5b			Log2		STL	Single_Cell_Data	YEASTRACT_2019	Tchourine_2018	ALL	0.05	1911	53	0.136895	2950	993
Figure_5b			Log2		STL	Single_Cell_Data	YEASTRACT_2019	Tchourine_2018	ALL	0.05	1911	54	0.149183	3021	1324
Figure_5b			Log2		STL	Single_Cell_Data	YEASTRACT_2019	Tchourine_2018	ALL	0.05	1911	55	0.169307	3109	1339
Figure_5b			Log2		STL	Single_Cell_Data	YEASTRACT_2019	Tchourine_2018	ALL	0.05	1911	56	0.133415	2984	760
Figure_5b			Log2		STL	Single_Cell_Data	YEASTRACT_2019	Tchourine_2018	ALL	0.05	1911	57	0.146134	3084	1152
Figure_5b			Log2		STL	Single_Cell_Data	YEASTRACT_2019	Tchourine_2018	ALL	0.05	1911	58	0.162702	2975	1461
Figure_5b			Log2		STL	Single_Cell_Data	YEASTRACT_2019	Tchourine_2018	ALL	0.05	1911	59	0.159619	3072	1459
Figure_5b			Log2		STL	Single_Cell_Data	YEASTRACT_2019	Tchourine_2018	ALL	0.05	1911	60	0.152684	2932	1017
Figure_5b			Log2		STL	Single_Cell_Data	YEASTRACT_2019	Tchourine_2018	ALL	0.05	1911	61	0.158658	3063	977
Figure_5b			Log2		STL	Single_Cell_Data	YEASTRACT_2019	Tchourine_2018	ALL	0.1	3822	42	0.157618	4619	863
Figure_5b			Log2		STL	Single_Cell_Data	YEASTRACT_2019	Tchourine_2018	ALL	0.1	3822	43	0.132925	4644	1093
Figure_5b			Log2		STL	Single_Cell_Data	YEASTRACT_2019	Tchourine_2018	ALL	0.1	3822	44	0.165159	4446	1719
Figure_5b			Log2		STL	Single_Cell_Data	YEASTRACT_2019	Tchourine_2018	ALL	0.1	3822	45	0.159469	4384	1476
Figure_5b			Log2		STL	Single_Cell_Data	YEASTRACT_2019	Tchourine_2018	ALL	0.1	3822	46	0.173271	4453	1696
Figure_5b			Log2		STL	Single_Cell_Data	YEASTRACT_2019	Tchourine_2018	ALL	0.1	3822	47	0.142519	4585	644
Figure_5b			Log2		STL	Single_Cell_Data	YEASTRACT_2019	Tchourine_2018	ALL	0.1	3822	48	0.14641	4642	1057
Figure_5b			Log2		STL	Single_Cell_Data	YEASTRACT_2019	Tchourine_2018	ALL	0.1	3822	49	0.149738	4640	1097
Figure_5b			Log2		STL	Single_Cell_Data	YEASTRACT_2019	Tchourine_2018	ALL	0.1	3822	50	0.167275	4594	1464
Figure_5b			Log2		STL	Single_Cell_Data	YEASTRACT_2019	Tchourine_2018	ALL	0.1	3822	51	0.139343	4633	1108
Figure_5b			Log2		STL	Single_Cell_Data	YEASTRACT_2019	Tchourine_2018	ALL	0.1	3822	52	0.155669	4653	1052
Figure_5b			Log2		STL	Single_Cell_Data	YEASTRACT_2019	Tchourine_2018	ALL	0.1	3822	53	0.142994	4466	1802
Figure_5b			Log2		STL	Single_Cell_Data	YEASTRACT_2019	Tchourine_2018	ALL	0.1	3822	54	0.155535	4590	1510
Figure_5b			Log2		STL	Single_Cell_Data	YEASTRACT_2019	Tchourine_2018	ALL	0.1	3822	55	0.174136	4607	1471
Figure_5b			Log2		STL	Single_Cell_Data	YEASTRACT_2019	Tchourine_2018	ALL	0.1	3822	56	0.151202	4616	1078
Figure_5b			Log2		STL	Single_Cell_Data	YEASTRACT_2019	Tchourine_2018	ALL	0.1	3822	57	0.157045	4669	1334
Figure_5b			Log2		STL	Single_Cell_Data	YEASTRACT_2019	Tchourine_2018	ALL	0.1	3822	58	0.175484	4570	1354
Figure_5b			Log2		STL	Single_Cell_Data	YEASTRACT_2019	Tchourine_2018	ALL	0.1	3822	59	0.163888	4598	1319
Figure_5b			Log2		STL	Single_Cell_Data	YEASTRACT_2019	Tchourine_2018	ALL	0.1	3822	60	0.162201	4428	1176
Figure_5b			Log2		STL	Single_Cell_Data	YEASTRACT_2019	Tchourine_2018	ALL	0.1	3822	61	0.167742	4619	978
Figure_5b			Log2		STL	Single_Cell_Data	YEASTRACT_2019	Tchourine_2018	ALL	0.25	9556	42	0.153602	7587	732
Figure_5b			Log2		STL	Single_Cell_Data	YEASTRACT_2019	Tchourine_2018	ALL	0.25	9556	43	0.134464	7482	973
Figure_5b			Log2		STL	Single_Cell_Data	YEASTRACT_2019	Tchourine_2018	ALL	0.25	9556	44	0.168441	7319	1633
Figure_5b			Log2		STL	Single_Cell_Data	YEASTRACT_2019	Tchourine_2018	ALL	0.25	9556	45	0.165861	7398	1607
Figure_5b			Log2		STL	Single_Cell_Data	YEASTRACT_2019	Tchourine_2018	ALL	0.25	9556	46	0.172762	7422	1715
Figure_5b			Log2		STL	Single_Cell_Data	YEASTRACT_2019	Tchourine_2018	ALL	0.25	9556	47	0.139809	7564	604
Figure_5b			Log2		STL	Single_Cell_Data	YEASTRACT_2019	Tchourine_2018	ALL	0.25	9556	48	0.147066	7548	1109
Figure_5b			Log2		STL	Single_Cell_Data	YEASTRACT_2019	Tchourine_2018	ALL	0.25	9556	49	0.149241	7408	1089
Figure_5b			Log2		STL	Single_Cell_Data	YEASTRACT_2019	Tchourine_2018	ALL	0.25	9556	50	0.164603	7563	1174
Figure_5b			Log2		STL	Single_Cell_Data	YEASTRACT_2019	Tchourine_2018	ALL	0.25	9556	51	0.13435	7490	602
Figure_5b			Log2		STL	Single_Cell_Data	YEASTRACT_2019	Tchourine_2018	ALL	0.25	9556	52	0.161136	7603	1231
Figure_5b			Log2		STL	Single_Cell_Data	YEASTRACT_2019	Tchourine_2018	ALL	0.25	9556	53	0.151465	7287	1271
Figure_5b			Log2		STL	Single_Cell_Data	YEASTRACT_2019	Tchourine_2018	ALL	0.25	9556	54	0.158765	7405	1667
Figure_5b			Log2		STL	Single_Cell_Data	YEASTRACT_2019	Tchourine_2018	ALL	0.25	9556	55	0.183414	7451	1303
Figure_5b			Log2		STL	Single_Cell_Data	YEASTRACT_2019	Tchourine_2018	ALL	0.25	9556	56	0.150551	7402	987
Figure_5b			Log2		STL	Single_Cell_Data	YEASTRACT_2019	Tchourine_2018	ALL	0.25	9556	57	0.170032	7573	1347
Figure_5b			Log2		STL	Single_Cell_Data	YEASTRACT_2019	Tchourine_2018	ALL	0.25	9556	58	0.176514	7390	1627
Figure_5b			Log2		STL	Single_Cell_Data	YEASTRACT_2019	Tchourine_2018	ALL	0.25	9556	59	0.165706	7284	1323
Figure_5b			Log2		STL	Single_Cell_Data	YEASTRACT_2019	Tchourine_2018	ALL	0.25	9556	60	0.163801	7181	969
Figure_5b			Log2		STL	Single_Cell_Data	YEASTRACT_2019	Tchourine_2018	ALL	0.25	9556	61	0.167169	7412	996
Figure_5b			Log2		STL	Single_Cell_Data	YEASTRACT_2019	Tchourine_2018	ALL	0.5	19112	42	0.15658	10295	878
Figure_5b			Log2		STL	Single_Cell_Data	YEASTRACT_2019	Tchourine_2018	ALL	0.5	19112	43	0.133778	10197	880
Figure_5b			Log2		STL	Single_Cell_Data	YEASTRACT_2019	Tchourine_2018	ALL	0.5	19112	44	0.16493	10108	1225
Figure_5b			Log2		STL	Single_Cell_Data	YEASTRACT_2019	Tchourine_2018	ALL	0.5	19112	45	0.172197	10133	1591
Figure_5b			Log2		STL	Single_Cell_Data	YEASTRACT_2019	Tchourine_2018	ALL	0.5	19112	46	0.168275	10449	1473
Figure_5b			Log2		STL	Single_Cell_Data	YEASTRACT_2019	Tchourine_2018	ALL	0.5	19112	47	0.13868	10334	689
Figure_5b			Log2		STL	Single_Cell_Data	YEASTRACT_2019	Tchourine_2018	ALL	0.5	19112	48	0.150524	10308	1079
Figure_5b			Log2		STL	Single_Cell_Data	YEASTRACT_2019	Tchourine_2018	ALL	0.5	19112	49	0.149495	10105	1157
Figure_5b			Log2		STL	Single_Cell_Data	YEASTRACT_2019	Tchourine_2018	ALL	0.5	19112	50	0.160268	10311	1136
Figure_5b			Log2		STL	Single_Cell_Data	YEASTRACT_2019	Tchourine_2018	ALL	0.5	19112	51	0.134329	10140	827
Figure_5b			Log2		STL	Single_Cell_Data	YEASTRACT_2019	Tchourine_2018	ALL	0.5	19112	52	0.160641	10394	1223
Figure_5b			Log2		STL	Single_Cell_Data	YEASTRACT_2019	Tchourine_2018	ALL	0.5	19112	53	0.148543	10075	950
Figure_5b			Log2		STL	Single_Cell_Data	YEASTRACT_2019	Tchourine_2018	ALL	0.5	19112	54	0.159416	10330	1631
Figure_5b			Log2		STL	Single_Cell_Data	YEASTRACT_2019	Tchourine_2018	ALL	0.5	19112	55	0.183754	10214	1315
Figure_5b			Log2		STL	Single_Cell_Data	YEASTRACT_2019	Tchourine_2018	ALL	0.5	19112	56	0.150283	10265	910
Figure_5b			Log2		STL	Single_Cell_Data	YEASTRACT_2019	Tchourine_2018	ALL	0.5	19112	57	0.167233	10537	1486
Figure_5b			Log2		STL	Single_Cell_Data	YEASTRACT_2019	Tchourine_2018	ALL	0.5	19112	58	0.176125	10212	1543
Figure_5b			Log2		STL	Single_Cell_Data	YEASTRACT_2019	Tchourine_2018	ALL	0.5	19112	59	0.171769	9933	1336
Figure_5b			Log2		STL	Single_Cell_Data	YEASTRACT_2019	Tchourine_2018	ALL	0.5	19112	60	0.160428	9637	972
Figure_5b			Log2		STL	Single_Cell_Data	YEASTRACT_2019	Tchourine_2018	ALL	0.5	19112	61	0.168247	10342	963
Figure_5b			Log2		STL	Single_Cell_Data	YEASTRACT_2019	Tchourine_2018	ALL	0.75	28668	42	0.157535	11790	959
Figure_5b			Log2		STL	Single_Cell_Data	YEASTRACT_2019	Tchourine_2018	ALL	0.75	28668	43	0.134219	11874	991
Figure_5b			Log2		STL	Single_Cell_Data	YEASTRACT_2019	Tchourine_2018	ALL	0.75	28668	44	0.168151	11786	1570
Figure_5b			Log2		STL	Single_Cell_Data	YEASTRACT_2019	Tchourine_2018	ALL	0.75	28668	45	0.169784	11696	1508
Figure_5b			Log2		STL	Single_Cell_Data	YEASTRACT_2019	Tchourine_2018	ALL	0.75	28668	46	0.167793	12118	1509
Figure_5b			Log2		STL	Single_Cell_Data	YEASTRACT_2019	Tchourine_2018	ALL	0.75	28668	47	0.136386	11890	659
Figure_5b			Log2		STL	Single_Cell_Data	YEASTRACT_2019	Tchourine_2018	ALL	0.75	28668	48	0.152272	11840	916
Figure_5b			Log2		STL	Single_Cell_Data	YEASTRACT_2019	Tchourine_2018	ALL	0.75	28668	49	0.14629	11790	747
Figure_5b			Log2		STL	Single_Cell_Data	YEASTRACT_2019	Tchourine_2018	ALL	0.75	28668	50	0.158681	11791	1233
Figure_5b			Log2		STL	Single_Cell_Data	YEASTRACT_2019	Tchourine_2018	ALL	0.75	28668	51	0.132948	11862	847
Figure_5b			Log2		STL	Single_Cell_Data	YEASTRACT_2019	Tchourine_2018	ALL	0.75	28668	52	0.1636	12003	1335
Figure_5b			Log2		STL	Single_Cell_Data	YEASTRACT_2019	Tchourine_2018	ALL	0.75	28668	53	0.148182	11752	955
Figure_5b			Log2		STL	Single_Cell_Data	YEASTRACT_2019	Tchourine_2018	ALL	0.75	28668	54	0.158369	11838	1557
Figure_5b			Log2		STL	Single_Cell_Data	YEASTRACT_2019	Tchourine_2018	ALL	0.75	28668	55	0.180092	11702	1206
Figure_5b			Log2		STL	Single_Cell_Data	YEASTRACT_2019	Tchourine_2018	ALL	0.75	28668	56	0.147251	11962	841
Figure_5b			Log2		STL	Single_Cell_Data	YEASTRACT_2019	Tchourine_2018	ALL	0.75	28668	57	0.164472	12051	1471
Figure_5b			Log2		STL	Single_Cell_Data	YEASTRACT_2019	Tchourine_2018	ALL	0.75	28668	58	0.172385	11744	1412
Figure_5b			Log2		STL	Single_Cell_Data	YEASTRACT_2019	Tchourine_2018	ALL	0.75	28668	59	0.168803	11692	1177
Figure_5b			Log2		STL	Single_Cell_Data	YEASTRACT_2019	Tchourine_2018	ALL	0.75	28668	60	0.15976	11498	961
Figure_5b			Log2		STL	Single_Cell_Data	YEASTRACT_2019	Tchourine_2018	ALL	0.75	28668	61	0.169682	11727	1046
Figure_5b			Log2		STL	Single_Cell_Data	YEASTRACT_2019	Tchourine_2018	ALL	1	38225	42	0.152874	12761	780
Figure_5b			Log2		STL	Single_Cell_Data	YEASTRACT_2019	Tchourine_2018	ALL	1	38225	43	0.131602	12792	317
Figure_5b			Log2		STL	Single_Cell_Data	YEASTRACT_2019	Tchourine_2018	ALL	1	38225	44	0.167607	12594	1537
Figure_5b			Log2		STL	Single_Cell_Data	YEASTRACT_2019	Tchourine_2018	ALL	1	38225	45	0.170881	12600	1577
Figure_5b			Log2		STL	Single_Cell_Data	YEASTRACT_2019	Tchourine_2018	ALL	1	38225	46	0.165949	12761	1388
Figure_5b			Log2		STL	Single_Cell_Data	YEASTRACT_2019	Tchourine_2018	ALL	1	38225	47	0.135607	12623	569
Figure_5b			Log2		STL	Single_Cell_Data	YEASTRACT_2019	Tchourine_2018	ALL	1	38225	48	0.15159	12592	1170
Figure_5b			Log2		STL	Single_Cell_Data	YEASTRACT_2019	Tchourine_2018	ALL	1	38225	49	0.145337	12587	685
Figure_5b			Log2		STL	Single_Cell_Data	YEASTRACT_2019	Tchourine_2018	ALL	1	38225	50	0.158135	12689	1079
Figure_5b			Log2		STL	Single_Cell_Data	YEASTRACT_2019	Tchourine_2018	ALL	1	38225	51	0.129092	12689	452
Figure_5b			Log2		STL	Single_Cell_Data	YEASTRACT_2019	Tchourine_2018	ALL	1	38225	52	0.161461	12704	1354
Figure_5b			Log2		STL	Single_Cell_Data	YEASTRACT_2019	Tchourine_2018	ALL	1	38225	53	0.14849	12661	1076
Figure_5b			Log2		STL	Single_Cell_Data	YEASTRACT_2019	Tchourine_2018	ALL	1	38225	54	0.156321	12644	1517
Figure_5b			Log2		STL	Single_Cell_Data	YEASTRACT_2019	Tchourine_2018	ALL	1	38225	55	0.181527	12644	1188
Figure_5b			Log2		STL	Single_Cell_Data	YEASTRACT_2019	Tchourine_2018	ALL	1	38225	56	0.150766	12676	870
Figure_5b			Log2		STL	Single_Cell_Data	YEASTRACT_2019	Tchourine_2018	ALL	1	38225	57	0.164295	12734	1339
Figure_5b			Log2		STL	Single_Cell_Data	YEASTRACT_2019	Tchourine_2018	ALL	1	38225	58	0.171938	12567	1315
Figure_5b			Log2		STL	Single_Cell_Data	YEASTRACT_2019	Tchourine_2018	ALL	1	38225	59	0.165663	12581	1356
Figure_5b			Log2		STL	Single_Cell_Data	YEASTRACT_2019	Tchourine_2018	ALL	1	38225	60	0.159067	12394	936
Figure_5b			Log2		STL	Single_Cell_Data	YEASTRACT_2019	Tchourine_2018	ALL	1	38225	61	0.169543	12571	1051
Figure_5b			Log2		STL	Single_Cell_Data	ATAC-MOTIF	Tchourine_2018	ALL	0.01	382	42	0.0609145	568	180
Figure_5b			Log2		STL	Single_Cell_Data	ATAC-MOTIF	Tchourine_2018	ALL	0.01	382	43	0.0768198	705	168
Figure_5b			Log2		STL	Single_Cell_Data	ATAC-MOTIF	Tchourine_2018	ALL	0.01	382	44	0.115452	697	734
Figure_5b			Log2		STL	Single_Cell_Data	ATAC-MOTIF	Tchourine_2018	ALL	0.01	382	45	0.0688842	598	193
Figure_5b			Log2		STL	Single_Cell_Data	ATAC-MOTIF	Tchourine_2018	ALL	0.01	382	46	0.0783783	547	498
Figure_5b			Log2		STL	Single_Cell_Data	ATAC-MOTIF	Tchourine_2018	ALL	0.01	382	47	0.0753164	699	117
Figure_5b			Log2		STL	Single_Cell_Data	ATAC-MOTIF	Tchourine_2018	ALL	0.01	382	48	0.072754	667	60
Figure_5b			Log2		STL	Single_Cell_Data	ATAC-MOTIF	Tchourine_2018	ALL	0.01	382	49	0.0696044	677	258
Figure_5b			Log2		STL	Single_Cell_Data	ATAC-MOTIF	Tchourine_2018	ALL	0.01	382	50	0.0640714	648	55
Figure_5b			Log2		STL	Single_Cell_Data	ATAC-MOTIF	Tchourine_2018	ALL	0.01	382	51	0.0714982	617	318
Figure_5b			Log2		STL	Single_Cell_Data	ATAC-MOTIF	Tchourine_2018	ALL	0.01	382	52	0.0691469	589	307
Figure_5b			Log2		STL	Single_Cell_Data	ATAC-MOTIF	Tchourine_2018	ALL	0.01	382	53	0.0950171	627	732
Figure_5b			Log2		STL	Single_Cell_Data	ATAC-MOTIF	Tchourine_2018	ALL	0.01	382	54	0.0838693	677	347
Figure_5b			Log2		STL	Single_Cell_Data	ATAC-MOTIF	Tchourine_2018	ALL	0.01	382	55	0.112399	666	685
Figure_5b			Log2		STL	Single_Cell_Data	ATAC-MOTIF	Tchourine_2018	ALL	0.01	382	56	0.0760601	688	174
Figure_5b			Log2		STL	Single_Cell_Data	ATAC-MOTIF	Tchourine_2018	ALL	0.01	382	57	0.0890683	678	367
Figure_5b			Log2		STL	Single_Cell_Data	ATAC-MOTIF	Tchourine_2018	ALL	0.01	382	58	0.0962083	671	396
Figure_5b			Log2		STL	Single_Cell_Data	ATAC-MOTIF	Tchourine_2018	ALL	0.01	382	59	0.0790776	622	259
Figure_5b			Log2		STL	Single_Cell_Data	ATAC-MOTIF	Tchourine_2018	ALL	0.01	382	60	0.0852553	625	520
Figure_5b			Log2		STL	Single_Cell_Data	ATAC-MOTIF	Tchourine_2018	ALL	0.01	382	61	0.0933862	669	388
Figure_5b			Log2		STL	Single_Cell_Data	ATAC-MOTIF	Tchourine_2018	ALL	0.025	955	42	0.0767347	1554	227
Figure_5b			Log2		STL	Single_Cell_Data	ATAC-MOTIF	Tchourine_2018	ALL	0.025	955	43	0.0896435	1637	559
Figure_5b			Log2		STL	Single_Cell_Data	ATAC-MOTIF	Tchourine_2018	ALL	0.025	955	44	0.132896	1647	684
Figure_5b			Log2		STL	Single_Cell_Data	ATAC-MOTIF	Tchourine_2018	ALL	0.025	955	45	0.0815535	1440	106
Figure_5b			Log2		STL	Single_Cell_Data	ATAC-MOTIF	Tchourine_2018	ALL	0.025	955	46	0.0981979	1429	592
Figure_5b			Log2		STL	Single_Cell_Data	ATAC-MOTIF	Tchourine_2018	ALL	0.025	955	47	0.0954096	1612	243
Figure_5b			Log2		STL	Single_Cell_Data	ATAC-MOTIF	Tchourine_2018	ALL	0.025	955	48	0.0897803	1517	115
Figure_5b			Log2		STL	Single_Cell_Data	ATAC-MOTIF	Tchourine_2018	ALL	0.025	955	49	0.0848835	1525	351
Figure_5b			Log2		STL	Single_Cell_Data	ATAC-MOTIF	Tchourine_2018	ALL	0.025	955	50	0.0836054	1531	268
Figure_5b			Log2		STL	Single_Cell_Data	ATAC-MOTIF	Tchourine_2018	ALL	0.025	955	51	0.0876696	1515	296
Figure_5b			Log2		STL	Single_Cell_Data	ATAC-MOTIF	Tchourine_2018	ALL	0.025	955	52	0.092094	1447	409
Figure_5b			Log2		STL	Single_Cell_Data	ATAC-MOTIF	Tchourine_2018	ALL	0.025	955	53	0.0993024	1461	421
Figure_5b			Log2		STL	Single_Cell_Data	ATAC-MOTIF	Tchourine_2018	ALL	0.025	955	54	0.101762	1552	388
Figure_5b			Log2		STL	Single_Cell_Data	ATAC-MOTIF	Tchourine_2018	ALL	0.025	955	55	0.12093	1626	491
Figure_5b			Log2		STL	Single_Cell_Data	ATAC-MOTIF	Tchourine_2018	ALL	0.025	955	56	0.087743	1515	113
Figure_5b			Log2		STL	Single_Cell_Data	ATAC-MOTIF	Tchourine_2018	ALL	0.025	955	57	0.108386	1597	566
Figure_5b			Log2		STL	Single_Cell_Data	ATAC-MOTIF	Tchourine_2018	ALL	0.025	955	58	0.108412	1585	565
Figure_5b			Log2		STL	Single_Cell_Data	ATAC-MOTIF	Tchourine_2018	ALL	0.025	955	59	0.0983991	1435	417
Figure_5b			Log2		STL	Single_Cell_Data	ATAC-MOTIF	Tchourine_2018	ALL	0.025	955	60	0.0985529	1542	306
Figure_5b			Log2		STL	Single_Cell_Data	ATAC-MOTIF	Tchourine_2018	ALL	0.025	955	61	0.112715	1688	505
Figure_5b			Log2		STL	Single_Cell_Data	ATAC-MOTIF	Tchourine_2018	ALL	0.05	1911	42	0.0790165	2758	304
Figure_5b			Log2		STL	Single_Cell_Data	ATAC-MOTIF	Tchourine_2018	ALL	0.05	1911	43	0.0927995	2822	548
Figure_5b			Log2		STL	Single_Cell_Data	ATAC-MOTIF	Tchourine_2018	ALL	0.05	1911	44	0.150565	2723	838
Figure_5b			Log2		STL	Single_Cell_Data	ATAC-MOTIF	Tchourine_2018	ALL	0.05	1911	45	0.087309	2668	155
Figure_5b			Log2		STL	Single_Cell_Data	ATAC-MOTIF	Tchourine_2018	ALL	0.05	1911	46	0.106285	2716	478
Figure_5b			Log2		STL	Single_Cell_Data	ATAC-MOTIF	Tchourine_2018	ALL	0.05	1911	47	0.0996389	3062	316
Figure_5b			Log2		STL	Single_Cell_Data	ATAC-MOTIF	Tchourine_2018	ALL	0.05	1911	48	0.092688	2747	59
Figure_5b			Log2		STL	Single_Cell_Data	ATAC-MOTIF	Tchourine_2018	ALL	0.05	1911	49	0.0889587	2800	331
Figure_5b			Log2		STL	Single_Cell_Data	ATAC-MOTIF	Tchourine_2018	ALL	0.05	1911	50	0.0918736	2744	170
Figure_5b			Log2		STL	Single_Cell_Data	ATAC-MOTIF	Tchourine_2018	ALL	0.05	1911	51	0.0967542	2745	378
Figure_5b			Log2		STL	Single_Cell_Data	ATAC-MOTIF	Tchourine_2018	ALL	0.05	1911	52	0.0949983	2643	361
Figure_5b			Log2		STL	Single_Cell_Data	ATAC-MOTIF	Tchourine_2018	ALL	0.05	1911	53	0.113096	2533	530
Figure_5b			Log2		STL	Single_Cell_Data	ATAC-MOTIF	Tchourine_2018	ALL	0.05	1911	54	0.101862	2835	565
Figure_5b			Log2		STL	Single_Cell_Data	ATAC-MOTIF	Tchourine_2018	ALL	0.05	1911	55	0.127874	2985	525
Figure_5b			Log2		STL	Single_Cell_Data	ATAC-MOTIF	Tchourine_2018	ALL	0.05	1911	56	0.0891364	2802	152
Figure_5b			Log2		STL	Single_Cell_Data	ATAC-MOTIF	Tchourine_2018	ALL	0.05	1911	57	0.110848	2791	597
Figure_5b			Log2		STL	Single_Cell_Data	ATAC-MOTIF	Tchourine_2018	ALL	0.05	1911	58	0.110627	2649	452
Figure_5b			Log2		STL	Single_Cell_Data	ATAC-MOTIF	Tchourine_2018	ALL	0.05	1911	59	0.107284	2804	438
Figure_5b			Log2		STL	Single_Cell_Data	ATAC-MOTIF	Tchourine_2018	ALL	0.05	1911	60	0.110805	2658	441
Figure_5b			Log2		STL	Single_Cell_Data	ATAC-MOTIF	Tchourine_2018	ALL	0.05	1911	61	0.122402	2944	753
Figure_5b			Log2		STL	Single_Cell_Data	ATAC-MOTIF	Tchourine_2018	ALL	0.1	3822	42	0.0793119	4659	325
Figure_5b			Log2		STL	Single_Cell_Data	ATAC-MOTIF	Tchourine_2018	ALL	0.1	3822	43	0.101233	4811	545
Figure_5b			Log2		STL	Single_Cell_Data	ATAC-MOTIF	Tchourine_2018	ALL	0.1	3822	44	0.151873	4536	753
Figure_5b			Log2		STL	Single_Cell_Data	ATAC-MOTIF	Tchourine_2018	ALL	0.1	3822	45	0.0987285	4563	183
Figure_5b			Log2		STL	Single_Cell_Data	ATAC-MOTIF	Tchourine_2018	ALL	0.1	3822	46	0.112541	4677	603
Figure_5b			Log2		STL	Single_Cell_Data	ATAC-MOTIF	Tchourine_2018	ALL	0.1	3822	47	0.102164	4815	315
Figure_5b			Log2		STL	Single_Cell_Data	ATAC-MOTIF	Tchourine_2018	ALL	0.1	3822	48	0.0936213	4658	54
Figure_5b			Log2		STL	Single_Cell_Data	ATAC-MOTIF	Tchourine_2018	ALL	0.1	3822	49	0.0882032	4755	282
Figure_5b			Log2		STL	Single_Cell_Data	ATAC-MOTIF	Tchourine_2018	ALL	0.1	3822	50	0.0953062	4645	188
Figure_5b			Log2		STL	Single_Cell_Data	ATAC-MOTIF	Tchourine_2018	ALL	0.1	3822	51	0.0965052	4800	324
Figure_5b			Log2		STL	Single_Cell_Data	ATAC-MOTIF	Tchourine_2018	ALL	0.1	3822	52	0.09885	4353	315
Figure_5b			Log2		STL	Single_Cell_Data	ATAC-MOTIF	Tchourine_2018	ALL	0.1	3822	53	0.106341	4407	428
Figure_5b			Log2		STL	Single_Cell_Data	ATAC-MOTIF	Tchourine_2018	ALL	0.1	3822	54	0.107871	4668	521
Figure_5b			Log2		STL	Single_Cell_Data	ATAC-MOTIF	Tchourine_2018	ALL	0.1	3822	55	0.128469	4738	527
Figure_5b			Log2		STL	Single_Cell_Data	ATAC-MOTIF	Tchourine_2018	ALL	0.1	3822	56	0.0970933	4846	324
Figure_5b			Log2		STL	Single_Cell_Data	ATAC-MOTIF	Tchourine_2018	ALL	0.1	3822	57	0.114104	4647	533
Figure_5b			Log2		STL	Single_Cell_Data	ATAC-MOTIF	Tchourine_2018	ALL	0.1	3822	58	0.113552	4643	460
Figure_5b			Log2		STL	Single_Cell_Data	ATAC-MOTIF	Tchourine_2018	ALL	0.1	3822	59	0.115134	4865	539
Figure_5b			Log2		STL	Single_Cell_Data	ATAC-MOTIF	Tchourine_2018	ALL	0.1	3822	60	0.112462	4651	394
Figure_5b			Log2		STL	Single_Cell_Data	ATAC-MOTIF	Tchourine_2018	ALL	0.1	3822	61	0.12993	4907	478
Figure_5b			Log2		STL	Single_Cell_Data	ATAC-MOTIF	Tchourine_2018	ALL	0.25	9556	42	0.0793891	8150	352
Figure_5b			Log2		STL	Single_Cell_Data	ATAC-MOTIF	Tchourine_2018	ALL	0.25	9556	43	0.105738	8264	501
Figure_5b			Log2		STL	Single_Cell_Data	ATAC-MOTIF	Tchourine_2018	ALL	0.25	9556	44	0.144136	8008	630
Figure_5b			Log2		STL	Single_Cell_Data	ATAC-MOTIF	Tchourine_2018	ALL	0.25	9556	45	0.0940703	7956	218
Figure_5b			Log2		STL	Single_Cell_Data	ATAC-MOTIF	Tchourine_2018	ALL	0.25	9556	46	0.114472	8015	587
Figure_5b			Log2		STL	Single_Cell_Data	ATAC-MOTIF	Tchourine_2018	ALL	0.25	9556	47	0.103968	8236	293
Figure_5b			Log2		STL	Single_Cell_Data	ATAC-MOTIF	Tchourine_2018	ALL	0.25	9556	48	0.099458	8075	0
Figure_5b			Log2		STL	Single_Cell_Data	ATAC-MOTIF	Tchourine_2018	ALL	0.25	9556	49	0.091171	8139	326
Figure_5b			Log2		STL	Single_Cell_Data	ATAC-MOTIF	Tchourine_2018	ALL	0.25	9556	50	0.0986298	8045	217
Figure_5b			Log2		STL	Single_Cell_Data	ATAC-MOTIF	Tchourine_2018	ALL	0.25	9556	51	0.0965612	8110	338
Figure_5b			Log2		STL	Single_Cell_Data	ATAC-MOTIF	Tchourine_2018	ALL	0.25	9556	52	0.100324	7734	388
Figure_5b			Log2		STL	Single_Cell_Data	ATAC-MOTIF	Tchourine_2018	ALL	0.25	9556	53	0.118069	7829	596
Figure_5b			Log2		STL	Single_Cell_Data	ATAC-MOTIF	Tchourine_2018	ALL	0.25	9556	54	0.110445	7999	549
Figure_5b			Log2		STL	Single_Cell_Data	ATAC-MOTIF	Tchourine_2018	ALL	0.25	9556	55	0.134804	8295	607
Figure_5b			Log2		STL	Single_Cell_Data	ATAC-MOTIF	Tchourine_2018	ALL	0.25	9556	56	0.100436	8127	355
Figure_5b			Log2		STL	Single_Cell_Data	ATAC-MOTIF	Tchourine_2018	ALL	0.25	9556	57	0.122395	7915	494
Figure_5b			Log2		STL	Single_Cell_Data	ATAC-MOTIF	Tchourine_2018	ALL	0.25	9556	58	0.114667	7858	546
Figure_5b			Log2		STL	Single_Cell_Data	ATAC-MOTIF	Tchourine_2018	ALL	0.25	9556	59	0.10978	8066	438
Figure_5b			Log2		STL	Single_Cell_Data	ATAC-MOTIF	Tchourine_2018	ALL	0.25	9556	60	0.110292	7844	408
Figure_5b			Log2		STL	Single_Cell_Data	ATAC-MOTIF	Tchourine_2018	ALL	0.25	9556	61	0.124277	8107	364
Figure_5b			Log2		STL	Single_Cell_Data	ATAC-MOTIF	Tchourine_2018	ALL	0.5	19112	42	0.0785745	9953	364
Figure_5b			Log2		STL	Single_Cell_Data	ATAC-MOTIF	Tchourine_2018	ALL	0.5	19112	43	0.103023	9999	285
Figure_5b			Log2		STL	Single_Cell_Data	ATAC-MOTIF	Tchourine_2018	ALL	0.5	19112	44	0.13953	9947	592
Figure_5b			Log2		STL	Single_Cell_Data	ATAC-MOTIF	Tchourine_2018	ALL	0.5	19112	45	0.0932531	9960	184
Figure_5b			Log2		STL	Single_Cell_Data	ATAC-MOTIF	Tchourine_2018	ALL	0.5	19112	46	0.119769	10100	574
Figure_5b			Log2		STL	Single_Cell_Data	ATAC-MOTIF	Tchourine_2018	ALL	0.5	19112	47	0.103073	10154	317
Figure_5b			Log2		STL	Single_Cell_Data	ATAC-MOTIF	Tchourine_2018	ALL	0.5	19112	48	0.0998057	10070	0
Figure_5b			Log2		STL	Single_Cell_Data	ATAC-MOTIF	Tchourine_2018	ALL	0.5	19112	49	0.0956345	10035	339
Figure_5b			Log2		STL	Single_Cell_Data	ATAC-MOTIF	Tchourine_2018	ALL	0.5	19112	50	0.0994648	10035	301
Figure_5b			Log2		STL	Single_Cell_Data	ATAC-MOTIF	Tchourine_2018	ALL	0.5	19112	51	0.096098	10069	347
Figure_5b			Log2		STL	Single_Cell_Data	ATAC-MOTIF	Tchourine_2018	ALL	0.5	19112	52	0.101446	9773	424
Figure_5b			Log2		STL	Single_Cell_Data	ATAC-MOTIF	Tchourine_2018	ALL	0.5	19112	53	0.115019	9897	423
Figure_5b			Log2		STL	Single_Cell_Data	ATAC-MOTIF	Tchourine_2018	ALL	0.5	19112	54	0.107943	9997	476
Figure_5b			Log2		STL	Single_Cell_Data	ATAC-MOTIF	Tchourine_2018	ALL	0.5	19112	55	0.134333	10176	516
Figure_5b			Log2		STL	Single_Cell_Data	ATAC-MOTIF	Tchourine_2018	ALL	0.5	19112	56	0.104874	10113	373
Figure_5b			Log2		STL	Single_Cell_Data	ATAC-MOTIF	Tchourine_2018	ALL	0.5	19112	57	0.121608	9999	388
Figure_5b			Log2		STL	Single_Cell_Data	ATAC-MOTIF	Tchourine_2018	ALL	0.5	19112	58	0.116217	10119	520
Figure_5b			Log2		STL	Single_Cell_Data	ATAC-MOTIF	Tchourine_2018	ALL	0.5	19112	59	0.112166	10014	333
Figure_5b			Log2		STL	Single_Cell_Data	ATAC-MOTIF	Tchourine_2018	ALL	0.5	19112	60	0.112564	9721	447
Figure_5b			Log2		STL	Single_Cell_Data	ATAC-MOTIF	Tchourine_2018	ALL	0.5	19112	61	0.125224	10093	405
Figure_5b			Log2		STL	Single_Cell_Data	ATAC-MOTIF	Tchourine_2018	ALL	0.75	28668	42	0.0789684	10656	382
Figure_5b			Log2		STL	Single_Cell_Data	ATAC-MOTIF	Tchourine_2018	ALL	0.75	28668	43	0.101659	10799	531
Figure_5b			Log2		STL	Single_Cell_Data	ATAC-MOTIF	Tchourine_2018	ALL	0.75	28668	44	0.14115	10573	578
Figure_5b			Log2		STL	Single_Cell_Data	ATAC-MOTIF	Tchourine_2018	ALL	0.75	28668	45	0.0922715	10651	203
Figure_5b			Log2		STL	Single_Cell_Data	ATAC-MOTIF	Tchourine_2018	ALL	0.75	28668	46	0.120899	10746	537
Figure_5b			Log2		STL	Single_Cell_Data	ATAC-MOTIF	Tchourine_2018	ALL	0.75	28668	47	0.0989201	10801	321
Figure_5b			Log2		STL	Single_Cell_Data	ATAC-MOTIF	Tchourine_2018	ALL	0.75	28668	48	0.100334	10819	0
Figure_5b			Log2		STL	Single_Cell_Data	ATAC-MOTIF	Tchourine_2018	ALL	0.75	28668	49	0.092226	10766	328
Figure_5b			Log2		STL	Single_Cell_Data	ATAC-MOTIF	Tchourine_2018	ALL	0.75	28668	50	0.0977404	10613	236
Figure_5b			Log2		STL	Single_Cell_Data	ATAC-MOTIF	Tchourine_2018	ALL	0.75	28668	51	0.0963893	10746	339
Figure_5b			Log2		STL	Single_Cell_Data	ATAC-MOTIF	Tchourine_2018	ALL	0.75	28668	52	0.099001	10554	440
Figure_5b			Log2		STL	Single_Cell_Data	ATAC-MOTIF	Tchourine_2018	ALL	0.75	28668	53	0.112063	10583	407
Figure_5b			Log2		STL	Single_Cell_Data	ATAC-MOTIF	Tchourine_2018	ALL	0.75	28668	54	0.107982	10528	442
Figure_5b			Log2		STL	Single_Cell_Data	ATAC-MOTIF	Tchourine_2018	ALL	0.75	28668	55	0.132848	10719	477
Figure_5b			Log2		STL	Single_Cell_Data	ATAC-MOTIF	Tchourine_2018	ALL	0.75	28668	56	0.103263	10746	330
Figure_5b			Log2		STL	Single_Cell_Data	ATAC-MOTIF	Tchourine_2018	ALL	0.75	28668	57	0.122691	10643	437
Figure_5b			Log2		STL	Single_Cell_Data	ATAC-MOTIF	Tchourine_2018	ALL	0.75	28668	58	0.116842	10812	516
Figure_5b			Log2		STL	Single_Cell_Data	ATAC-MOTIF	Tchourine_2018	ALL	0.75	28668	59	0.112002	10661	347
Figure_5b			Log2		STL	Single_Cell_Data	ATAC-MOTIF	Tchourine_2018	ALL	0.75	28668	60	0.1124	10601	472
Figure_5b			Log2		STL	Single_Cell_Data	ATAC-MOTIF	Tchourine_2018	ALL	0.75	28668	61	0.124814	10794	327
Figure_5b			Log2		STL	Single_Cell_Data	ATAC-MOTIF	Tchourine_2018	ALL	1	38225	42	0.0777822	11058	395
Figure_5b			Log2		STL	Single_Cell_Data	ATAC-MOTIF	Tchourine_2018	ALL	1	38225	43	0.101993	11195	468
Figure_5b			Log2		STL	Single_Cell_Data	ATAC-MOTIF	Tchourine_2018	ALL	1	38225	44	0.137537	10960	600
Figure_5b			Log2		STL	Single_Cell_Data	ATAC-MOTIF	Tchourine_2018	ALL	1	38225	45	0.0909112	11063	215
Figure_5b			Log2		STL	Single_Cell_Data	ATAC-MOTIF	Tchourine_2018	ALL	1	38225	46	0.11962	11075	483
Figure_5b			Log2		STL	Single_Cell_Data	ATAC-MOTIF	Tchourine_2018	ALL	1	38225	47	0.0975774	11157	262
Figure_5b			Log2		STL	Single_Cell_Data	ATAC-MOTIF	Tchourine_2018	ALL	1	38225	48	0.0994063	11093	0
Figure_5b			Log2		STL	Single_Cell_Data	ATAC-MOTIF	Tchourine_2018	ALL	1	38225	49	0.0945397	11086	225
Figure_5b			Log2		STL	Single_Cell_Data	ATAC-MOTIF	Tchourine_2018	ALL	1	38225	50	0.0968423	11017	236
Figure_5b			Log2		STL	Single_Cell_Data	ATAC-MOTIF	Tchourine_2018	ALL	1	38225	51	0.0961549	11048	360
Figure_5b			Log2		STL	Single_Cell_Data	ATAC-MOTIF	Tchourine_2018	ALL	1	38225	52	0.103124	10892	425
Figure_5b			Log2		STL	Single_Cell_Data	ATAC-MOTIF	Tchourine_2018	ALL	1	38225	53	0.112868	10950	444
Figure_5b			Log2		STL	Single_Cell_Data	ATAC-MOTIF	Tchourine_2018	ALL	1	38225	54	0.107944	11049	423
Figure_5b			Log2		STL	Single_Cell_Data	ATAC-MOTIF	Tchourine_2018	ALL	1	38225	55	0.134016	11098	479
Figure_5b			Log2		STL	Single_Cell_Data	ATAC-MOTIF	Tchourine_2018	ALL	1	38225	56	0.104505	11173	357
Figure_5b			Log2		STL	Single_Cell_Data	ATAC-MOTIF	Tchourine_2018	ALL	1	38225	57	0.123639	10999	397
Figure_5b			Log2		STL	Single_Cell_Data	ATAC-MOTIF	Tchourine_2018	ALL	1	38225	58	0.118341	11219	482
Figure_5b			Log2		STL	Single_Cell_Data	ATAC-MOTIF	Tchourine_2018	ALL	1	38225	59	0.109062	11022	272
Figure_5b			Log2		STL	Single_Cell_Data	ATAC-MOTIF	Tchourine_2018	ALL	1	38225	60	0.110947	11008	374
Figure_5b			Log2		STL	Single_Cell_Data	ATAC-MOTIF	Tchourine_2018	ALL	1	38225	61	0.123651	11119	321
Figure_5b			Log2		STL	Single_Cell_Data	BUSSEMAKER	Tchourine_2018	ALL	0.01	382	42	0.0456603	762	0
Figure_5b			Log2		STL	Single_Cell_Data	BUSSEMAKER	Tchourine_2018	ALL	0.01	382	43	0.0709493	867	20
Figure_5b			Log2		STL	Single_Cell_Data	BUSSEMAKER	Tchourine_2018	ALL	0.01	382	44	0.08523	911	312
Figure_5b			Log2		STL	Single_Cell_Data	BUSSEMAKER	Tchourine_2018	ALL	0.01	382	45	0.0542188	737	0
Figure_5b			Log2		STL	Single_Cell_Data	BUSSEMAKER	Tchourine_2018	ALL	0.01	382	46	0.0513283	665	0
Figure_5b			Log2		STL	Single_Cell_Data	BUSSEMAKER	Tchourine_2018	ALL	0.01	382	47	0.0569042	820	0
Figure_5b			Log2		STL	Single_Cell_Data	BUSSEMAKER	Tchourine_2018	ALL	0.01	382	48	0.0790107	813	0
Figure_5b			Log2		STL	Single_Cell_Data	BUSSEMAKER	Tchourine_2018	ALL	0.01	382	49	0.0401384	771	0
Figure_5b			Log2		STL	Single_Cell_Data	BUSSEMAKER	Tchourine_2018	ALL	0.01	382	50	0.0657319	788	0
Figure_5b			Log2		STL	Single_Cell_Data	BUSSEMAKER	Tchourine_2018	ALL	0.01	382	51	0.0620088	797	20
Figure_5b			Log2		STL	Single_Cell_Data	BUSSEMAKER	Tchourine_2018	ALL	0.01	382	52	0.029895	688	0
Figure_5b			Log2		STL	Single_Cell_Data	BUSSEMAKER	Tchourine_2018	ALL	0.01	382	53	0.0467634	732	0
Figure_5b			Log2		STL	Single_Cell_Data	BUSSEMAKER	Tchourine_2018	ALL	0.01	382	54	0.0908911	844	329
Figure_5b			Log2		STL	Single_Cell_Data	BUSSEMAKER	Tchourine_2018	ALL	0.01	382	55	0.0513286	751	0
Figure_5b			Log2		STL	Single_Cell_Data	BUSSEMAKER	Tchourine_2018	ALL	0.01	382	56	0.0302351	748	0
Figure_5b			Log2		STL	Single_Cell_Data	BUSSEMAKER	Tchourine_2018	ALL	0.01	382	57	0.0311874	809	0
Figure_5b			Log2		STL	Single_Cell_Data	BUSSEMAKER	Tchourine_2018	ALL	0.01	382	58	0.0598016	872	0
Figure_5b			Log2		STL	Single_Cell_Data	BUSSEMAKER	Tchourine_2018	ALL	0.01	382	59	0.096263	830	333
Figure_5b			Log2		STL	Single_Cell_Data	BUSSEMAKER	Tchourine_2018	ALL	0.01	382	60	0.0473409	752	0
Figure_5b			Log2		STL	Single_Cell_Data	BUSSEMAKER	Tchourine_2018	ALL	0.01	382	61	0.0604256	763	0
Figure_5b			Log2		STL	Single_Cell_Data	BUSSEMAKER	Tchourine_2018	ALL	0.025	955	42	0.0557035	1714	0
Figure_5b			Log2		STL	Single_Cell_Data	BUSSEMAKER	Tchourine_2018	ALL	0.025	955	43	0.0999413	1921	556
Figure_5b			Log2		STL	Single_Cell_Data	BUSSEMAKER	Tchourine_2018	ALL	0.025	955	44	0.0976492	1803	384
Figure_5b			Log2		STL	Single_Cell_Data	BUSSEMAKER	Tchourine_2018	ALL	0.025	955	45	0.0517031	1647	0
Figure_5b			Log2		STL	Single_Cell_Data	BUSSEMAKER	Tchourine_2018	ALL	0.025	955	46	0.0848029	1671	0
Figure_5b			Log2		STL	Single_Cell_Data	BUSSEMAKER	Tchourine_2018	ALL	0.025	955	47	0.0770419	1933	0
Figure_5b			Log2		STL	Single_Cell_Data	BUSSEMAKER	Tchourine_2018	ALL	0.025	955	48	0.0990586	1767	341
Figure_5b			Log2		STL	Single_Cell_Data	BUSSEMAKER	Tchourine_2018	ALL	0.025	955	49	0.0519068	1710	0
Figure_5b			Log2		STL	Single_Cell_Data	BUSSEMAKER	Tchourine_2018	ALL	0.025	955	50	0.088207	1740	235
Figure_5b			Log2		STL	Single_Cell_Data	BUSSEMAKER	Tchourine_2018	ALL	0.025	955	51	0.0792797	1783	38
Figure_5b			Log2		STL	Single_Cell_Data	BUSSEMAKER	Tchourine_2018	ALL	0.025	955	52	0.0381752	1635	0
Figure_5b			Log2		STL	Single_Cell_Data	BUSSEMAKER	Tchourine_2018	ALL	0.025	955	53	0.0607204	1605	0
Figure_5b			Log2		STL	Single_Cell_Data	BUSSEMAKER	Tchourine_2018	ALL	0.025	955	54	0.1148	1895	461
Figure_5b			Log2		STL	Single_Cell_Data	BUSSEMAKER	Tchourine_2018	ALL	0.025	955	55	0.0478893	1783	0
Figure_5b			Log2		STL	Single_Cell_Data	BUSSEMAKER	Tchourine_2018	ALL	0.025	955	56	0.0518701	1652	0
Figure_5b			Log2		STL	Single_Cell_Data	BUSSEMAKER	Tchourine_2018	ALL	0.025	955	57	0.0375308	1786	0
Figure_5b			Log2		STL	Single_Cell_Data	BUSSEMAKER	Tchourine_2018	ALL	0.025	955	58	0.0737302	1726	0
Figure_5b			Log2		STL	Single_Cell_Data	BUSSEMAKER	Tchourine_2018	ALL	0.025	955	59	0.115031	1867	414
Figure_5b			Log2		STL	Single_Cell_Data	BUSSEMAKER	Tchourine_2018	ALL	0.025	955	60	0.0598908	1759	0
Figure_5b			Log2		STL	Single_Cell_Data	BUSSEMAKER	Tchourine_2018	ALL	0.025	955	61	0.0867984	1846	0
Figure_5b			Log2		STL	Single_Cell_Data	BUSSEMAKER	Tchourine_2018	ALL	0.05	1911	42	0.0580772	2895	0
Figure_5b			Log2		STL	Single_Cell_Data	BUSSEMAKER	Tchourine_2018	ALL	0.05	1911	43	0.103436	3054	488
Figure_5b			Log2		STL	Single_Cell_Data	BUSSEMAKER	Tchourine_2018	ALL	0.05	1911	44	0.109068	3069	386
Figure_5b			Log2		STL	Single_Cell_Data	BUSSEMAKER	Tchourine_2018	ALL	0.05	1911	45	0.0785757	3038	159
Figure_5b			Log2		STL	Single_Cell_Data	BUSSEMAKER	Tchourine_2018	ALL	0.05	1911	46	0.108895	2945	364
Figure_5b			Log2		STL	Single_Cell_Data	BUSSEMAKER	Tchourine_2018	ALL	0.05	1911	47	0.0926238	3455	0
Figure_5b			Log2		STL	Single_Cell_Data	BUSSEMAKER	Tchourine_2018	ALL	0.05	1911	48	0.110166	2959	404
Figure_5b			Log2		STL	Single_Cell_Data	BUSSEMAKER	Tchourine_2018	ALL	0.05	1911	49	0.0778617	3083	0
Figure_5b			Log2		STL	Single_Cell_Data	BUSSEMAKER	Tchourine_2018	ALL	0.05	1911	50	0.104386	3010	286
Figure_5b			Log2		STL	Single_Cell_Data	BUSSEMAKER	Tchourine_2018	ALL	0.05	1911	51	0.0867756	3038	317
Figure_5b			Log2		STL	Single_Cell_Data	BUSSEMAKER	Tchourine_2018	ALL	0.05	1911	52	0.0396571	2930	0
Figure_5b			Log2		STL	Single_Cell_Data	BUSSEMAKER	Tchourine_2018	ALL	0.05	1911	53	0.0515315	2768	30
Figure_5b			Log2		STL	Single_Cell_Data	BUSSEMAKER	Tchourine_2018	ALL	0.05	1911	54	0.115834	3136	448
Figure_5b			Log2		STL	Single_Cell_Data	BUSSEMAKER	Tchourine_2018	ALL	0.05	1911	55	0.0447423	3176	33
Figure_5b			Log2		STL	Single_Cell_Data	BUSSEMAKER	Tchourine_2018	ALL	0.05	1911	56	0.0646315	2899	0
Figure_5b			Log2		STL	Single_Cell_Data	BUSSEMAKER	Tchourine_2018	ALL	0.05	1911	57	0.0444618	3122	37
Figure_5b			Log2		STL	Single_Cell_Data	BUSSEMAKER	Tchourine_2018	ALL	0.05	1911	58	0.094001	2902	0
Figure_5b			Log2		STL	Single_Cell_Data	BUSSEMAKER	Tchourine_2018	ALL	0.05	1911	59	0.122346	3135	456
Figure_5b			Log2		STL	Single_Cell_Data	BUSSEMAKER	Tchourine_2018	ALL	0.05	1911	60	0.0440431	2946	0
Figure_5b			Log2		STL	Single_Cell_Data	BUSSEMAKER	Tchourine_2018	ALL	0.05	1911	61	0.0888913	3144	132
Figure_5b			Log2		STL	Single_Cell_Data	BUSSEMAKER	Tchourine_2018	ALL	0.1	3822	42	0.0624819	5035	113
Figure_5b			Log2		STL	Single_Cell_Data	BUSSEMAKER	Tchourine_2018	ALL	0.1	3822	43	0.0996239	4968	476
Figure_5b			Log2		STL	Single_Cell_Data	BUSSEMAKER	Tchourine_2018	ALL	0.1	3822	44	0.117163	4918	491
Figure_5b			Log2		STL	Single_Cell_Data	BUSSEMAKER	Tchourine_2018	ALL	0.1	3822	45	0.0908203	4970	226
Figure_5b			Log2		STL	Single_Cell_Data	BUSSEMAKER	Tchourine_2018	ALL	0.1	3822	46	0.109353	4827	368
Figure_5b			Log2		STL	Single_Cell_Data	BUSSEMAKER	Tchourine_2018	ALL	0.1	3822	47	0.097898	5018	279
Figure_5b			Log2		STL	Single_Cell_Data	BUSSEMAKER	Tchourine_2018	ALL	0.1	3822	48	0.116791	4828	321
Figure_5b			Log2		STL	Single_Cell_Data	BUSSEMAKER	Tchourine_2018	ALL	0.1	3822	49	0.0835156	5229	278
Figure_5b			Log2		STL	Single_Cell_Data	BUSSEMAKER	Tchourine_2018	ALL	0.1	3822	50	0.106759	4962	281
Figure_5b			Log2		STL	Single_Cell_Data	BUSSEMAKER	Tchourine_2018	ALL	0.1	3822	51	0.0901098	5081	330
Figure_5b			Log2		STL	Single_Cell_Data	BUSSEMAKER	Tchourine_2018	ALL	0.1	3822	52	0.0403216	4969	0
Figure_5b			Log2		STL	Single_Cell_Data	BUSSEMAKER	Tchourine_2018	ALL	0.1	3822	53	0.0591165	4876	0
Figure_5b			Log2		STL	Single_Cell_Data	BUSSEMAKER	Tchourine_2018	ALL	0.1	3822	54	0.112226	5133	369
Figure_5b			Log2		STL	Single_Cell_Data	BUSSEMAKER	Tchourine_2018	ALL	0.1	3822	55	0.0537045	5020	70
Figure_5b			Log2		STL	Single_Cell_Data	BUSSEMAKER	Tchourine_2018	ALL	0.1	3822	56	0.0722583	4970	94
Figure_5b			Log2		STL	Single_Cell_Data	BUSSEMAKER	Tchourine_2018	ALL	0.1	3822	57	0.0480299	5044	38
Figure_5b			Log2		STL	Single_Cell_Data	BUSSEMAKER	Tchourine_2018	ALL	0.1	3822	58	0.0968091	5015	0
Figure_5b			Log2		STL	Single_Cell_Data	BUSSEMAKER	Tchourine_2018	ALL	0.1	3822	59	0.121951	5094	432
Figure_5b			Log2		STL	Single_Cell_Data	BUSSEMAKER	Tchourine_2018	ALL	0.1	3822	60	0.0486609	4902	0
Figure_5b			Log2		STL	Single_Cell_Data	BUSSEMAKER	Tchourine_2018	ALL	0.1	3822	61	0.107305	5142	258
Figure_5b			Log2		STL	Single_Cell_Data	BUSSEMAKER	Tchourine_2018	ALL	0.25	9556	42	0.0619865	7547	209
Figure_5b			Log2		STL	Single_Cell_Data	BUSSEMAKER	Tchourine_2018	ALL	0.25	9556	43	0.109695	7487	524
Figure_5b			Log2		STL	Single_Cell_Data	BUSSEMAKER	Tchourine_2018	ALL	0.25	9556	44	0.128924	7542	615
Figure_5b			Log2		STL	Single_Cell_Data	BUSSEMAKER	Tchourine_2018	ALL	0.25	9556	45	0.0866568	7650	169
Figure_5b			Log2		STL	Single_Cell_Data	BUSSEMAKER	Tchourine_2018	ALL	0.25	9556	46	0.110657	7262	389
Figure_5b			Log2		STL	Single_Cell_Data	BUSSEMAKER	Tchourine_2018	ALL	0.25	9556	47	0.0997845	7566	299
Figure_5b			Log2		STL	Single_Cell_Data	BUSSEMAKER	Tchourine_2018	ALL	0.25	9556	48	0.116977	7455	328
Figure_5b			Log2		STL	Single_Cell_Data	BUSSEMAKER	Tchourine_2018	ALL	0.25	9556	49	0.074316	7533	229
Figure_5b			Log2		STL	Single_Cell_Data	BUSSEMAKER	Tchourine_2018	ALL	0.25	9556	50	0.104322	7354	307
Figure_5b			Log2		STL	Single_Cell_Data	BUSSEMAKER	Tchourine_2018	ALL	0.25	9556	51	0.0840436	7451	280
Figure_5b			Log2		STL	Single_Cell_Data	BUSSEMAKER	Tchourine_2018	ALL	0.25	9556	52	0.04322	7480	0
Figure_5b			Log2		STL	Single_Cell_Data	BUSSEMAKER	Tchourine_2018	ALL	0.25	9556	53	0.060325	7470	74
Figure_5b			Log2		STL	Single_Cell_Data	BUSSEMAKER	Tchourine_2018	ALL	0.25	9556	54	0.107834	7546	402
Figure_5b			Log2		STL	Single_Cell_Data	BUSSEMAKER	Tchourine_2018	ALL	0.25	9556	55	0.0608357	7539	217
Figure_5b			Log2		STL	Single_Cell_Data	BUSSEMAKER	Tchourine_2018	ALL	0.25	9556	56	0.0736156	7383	126
Figure_5b			Log2		STL	Single_Cell_Data	BUSSEMAKER	Tchourine_2018	ALL	0.25	9556	57	0.0624849	7483	173
Figure_5b			Log2		STL	Single_Cell_Data	BUSSEMAKER	Tchourine_2018	ALL	0.25	9556	58	0.0946734	7365	35
Figure_5b			Log2		STL	Single_Cell_Data	BUSSEMAKER	Tchourine_2018	ALL	0.25	9556	59	0.122447	7586	441
Figure_5b			Log2		STL	Single_Cell_Data	BUSSEMAKER	Tchourine_2018	ALL	0.25	9556	60	0.0516998	7496	82
Figure_5b			Log2		STL	Single_Cell_Data	BUSSEMAKER	Tchourine_2018	ALL	0.25	9556	61	0.112491	7592	333
Figure_5b			Log2		STL	Single_Cell_Data	BUSSEMAKER	Tchourine_2018	ALL	0.5	19112	42	0.070516	8510	252
Figure_5b			Log2		STL	Single_Cell_Data	BUSSEMAKER	Tchourine_2018	ALL	0.5	19112	43	0.110052	8575	475
Figure_5b			Log2		STL	Single_Cell_Data	BUSSEMAKER	Tchourine_2018	ALL	0.5	19112	44	0.129619	8519	572
Figure_5b			Log2		STL	Single_Cell_Data	BUSSEMAKER	Tchourine_2018	ALL	0.5	19112	45	0.086949	8689	203
Figure_5b			Log2		STL	Single_Cell_Data	BUSSEMAKER	Tchourine_2018	ALL	0.5	19112	46	0.11112	8478	380
Figure_5b			Log2		STL	Single_Cell_Data	BUSSEMAKER	Tchourine_2018	ALL	0.5	19112	47	0.105577	8550	305
Figure_5b			Log2		STL	Single_Cell_Data	BUSSEMAKER	Tchourine_2018	ALL	0.5	19112	48	0.116762	8575	360
Figure_5b			Log2		STL	Single_Cell_Data	BUSSEMAKER	Tchourine_2018	ALL	0.5	19112	49	0.0729323	8473	249
Figure_5b			Log2		STL	Single_Cell_Data	BUSSEMAKER	Tchourine_2018	ALL	0.5	19112	50	0.101812	8410	309
Figure_5b			Log2		STL	Single_Cell_Data	BUSSEMAKER	Tchourine_2018	ALL	0.5	19112	51	0.0848492	8518	276
Figure_5b			Log2		STL	Single_Cell_Data	BUSSEMAKER	Tchourine_2018	ALL	0.5	19112	52	0.050584	8581	0
Figure_5b			Log2		STL	Single_Cell_Data	BUSSEMAKER	Tchourine_2018	ALL	0.5	19112	53	0.0639322	8539	72
Figure_5b			Log2		STL	Single_Cell_Data	BUSSEMAKER	Tchourine_2018	ALL	0.5	19112	54	0.109816	8588	385
Figure_5b			Log2		STL	Single_Cell_Data	BUSSEMAKER	Tchourine_2018	ALL	0.5	19112	55	0.0614153	8585	220
Figure_5b			Log2		STL	Single_Cell_Data	BUSSEMAKER	Tchourine_2018	ALL	0.5	19112	56	0.0653501	8568	100
Figure_5b			Log2		STL	Single_Cell_Data	BUSSEMAKER	Tchourine_2018	ALL	0.5	19112	57	0.0624919	8671	180
Figure_5b			Log2		STL	Single_Cell_Data	BUSSEMAKER	Tchourine_2018	ALL	0.5	19112	58	0.0966491	8511	119
Figure_5b			Log2		STL	Single_Cell_Data	BUSSEMAKER	Tchourine_2018	ALL	0.5	19112	59	0.11836	8623	427
Figure_5b			Log2		STL	Single_Cell_Data	BUSSEMAKER	Tchourine_2018	ALL	0.5	19112	60	0.0551756	8526	83
Figure_5b			Log2		STL	Single_Cell_Data	BUSSEMAKER	Tchourine_2018	ALL	0.5	19112	61	0.112299	8602	299
Figure_5b			Log2		STL	Single_Cell_Data	BUSSEMAKER	Tchourine_2018	ALL	0.75	28668	42	0.0735151	9014	284
Figure_5b			Log2		STL	Single_Cell_Data	BUSSEMAKER	Tchourine_2018	ALL	0.75	28668	43	0.110654	8968	471
Figure_5b			Log2		STL	Single_Cell_Data	BUSSEMAKER	Tchourine_2018	ALL	0.75	28668	44	0.125915	9040	578
Figure_5b			Log2		STL	Single_Cell_Data	BUSSEMAKER	Tchourine_2018	ALL	0.75	28668	45	0.0865551	9114	208
Figure_5b			Log2		STL	Single_Cell_Data	BUSSEMAKER	Tchourine_2018	ALL	0.75	28668	46	0.110754	8918	416
Figure_5b			Log2		STL	Single_Cell_Data	BUSSEMAKER	Tchourine_2018	ALL	0.75	28668	47	0.102218	9012	328
Figure_5b			Log2		STL	Single_Cell_Data	BUSSEMAKER	Tchourine_2018	ALL	0.75	28668	48	0.11792	9081	387
Figure_5b			Log2		STL	Single_Cell_Data	BUSSEMAKER	Tchourine_2018	ALL	0.75	28668	49	0.0734053	8929	249
Figure_5b			Log2		STL	Single_Cell_Data	BUSSEMAKER	Tchourine_2018	ALL	0.75	28668	50	0.10113	8898	317
Figure_5b			Log2		STL	Single_Cell_Data	BUSSEMAKER	Tchourine_2018	ALL	0.75	28668	51	0.0804943	9027	254
Figure_5b			Log2		STL	Single_Cell_Data	BUSSEMAKER	Tchourine_2018	ALL	0.75	28668	52	0.0518751	9026	0
Figure_5b			Log2		STL	Single_Cell_Data	BUSSEMAKER	Tchourine_2018	ALL	0.75	28668	53	0.0654428	8997	206
Figure_5b			Log2		STL	Single_Cell_Data	BUSSEMAKER	Tchourine_2018	ALL	0.75	28668	54	0.108348	9056	402
Figure_5b			Log2		STL	Single_Cell_Data	BUSSEMAKER	Tchourine_2018	ALL	0.75	28668	55	0.062043	9038	272
Figure_5b			Log2		STL	Single_Cell_Data	BUSSEMAKER	Tchourine_2018	ALL	0.75	28668	56	0.069072	8950	100
Figure_5b			Log2		STL	Single_Cell_Data	BUSSEMAKER	Tchourine_2018	ALL	0.75	28668	57	0.0615124	9088	177
Figure_5b			Log2		STL	Single_Cell_Data	BUSSEMAKER	Tchourine_2018	ALL	0.75	28668	58	0.0967679	9024	22
Figure_5b			Log2		STL	Single_Cell_Data	BUSSEMAKER	Tchourine_2018	ALL	0.75	28668	59	0.116737	9056	384
Figure_5b			Log2		STL	Single_Cell_Data	BUSSEMAKER	Tchourine_2018	ALL	0.75	28668	60	0.056969	8975	92
Figure_5b			Log2		STL	Single_Cell_Data	BUSSEMAKER	Tchourine_2018	ALL	0.75	28668	61	0.112888	9007	306
Figure_5b			Log2		STL	Single_Cell_Data	BUSSEMAKER	Tchourine_2018	ALL	1	38225	42	0.0747563	9282	299
Figure_5b			Log2		STL	Single_Cell_Data	BUSSEMAKER	Tchourine_2018	ALL	1	38225	43	0.106336	9287	470
Figure_5b			Log2		STL	Single_Cell_Data	BUSSEMAKER	Tchourine_2018	ALL	1	38225	44	0.125326	9200	569
Figure_5b			Log2		STL	Single_Cell_Data	BUSSEMAKER	Tchourine_2018	ALL	1	38225	45	0.0884677	9265	188
Figure_5b			Log2		STL	Single_Cell_Data	BUSSEMAKER	Tchourine_2018	ALL	1	38225	46	0.109859	9206	400
Figure_5b			Log2		STL	Single_Cell_Data	BUSSEMAKER	Tchourine_2018	ALL	1	38225	47	0.101925	9283	301
Figure_5b			Log2		STL	Single_Cell_Data	BUSSEMAKER	Tchourine_2018	ALL	1	38225	48	0.119776	9274	376
Figure_5b			Log2		STL	Single_Cell_Data	BUSSEMAKER	Tchourine_2018	ALL	1	38225	49	0.0746935	9276	261
Figure_5b			Log2		STL	Single_Cell_Data	BUSSEMAKER	Tchourine_2018	ALL	1	38225	50	0.101016	9112	320
Figure_5b			Log2		STL	Single_Cell_Data	BUSSEMAKER	Tchourine_2018	ALL	1	38225	51	0.0817185	9213	50
Figure_5b			Log2		STL	Single_Cell_Data	BUSSEMAKER	Tchourine_2018	ALL	1	38225	52	0.0526329	9242	0
Figure_5b			Log2		STL	Single_Cell_Data	BUSSEMAKER	Tchourine_2018	ALL	1	38225	53	0.0635084	9267	211
Figure_5b			Log2		STL	Single_Cell_Data	BUSSEMAKER	Tchourine_2018	ALL	1	38225	54	0.107797	9292	392
Figure_5b			Log2		STL	Single_Cell_Data	BUSSEMAKER	Tchourine_2018	ALL	1	38225	55	0.0635476	9240	254
Figure_5b			Log2		STL	Single_Cell_Data	BUSSEMAKER	Tchourine_2018	ALL	1	38225	56	0.0699798	9226	133
Figure_5b			Log2		STL	Single_Cell_Data	BUSSEMAKER	Tchourine_2018	ALL	1	38225	57	0.063008	9355	200
Figure_5b			Log2		STL	Single_Cell_Data	BUSSEMAKER	Tchourine_2018	ALL	1	38225	58	0.0986214	9191	178
Figure_5b			Log2		STL	Single_Cell_Data	BUSSEMAKER	Tchourine_2018	ALL	1	38225	59	0.116903	9320	393
Figure_5b			Log2		STL	Single_Cell_Data	BUSSEMAKER	Tchourine_2018	ALL	1	38225	60	0.0584972	9265	94
Figure_5b			Log2		STL	Single_Cell_Data	BUSSEMAKER	Tchourine_2018	ALL	1	38225	61	0.109123	9300	298
Figure_5c			Log2		STL	Single_Cell_Data		Tchourine_2018	ALL	0.013	495	42	0.156282	1063	1006
Figure_5c			Log2		STL	Single_Cell_Data		Tchourine_2018	ALL	0.013	495	43	0.165149	1188	986
Figure_5c			Log2		STL	Single_Cell_Data		Tchourine_2018	ALL	0.013	495	44	0.206065	1183	1447
Figure_5c			Log2		STL	Single_Cell_Data		Tchourine_2018	ALL	0.013	495	45	0.168105	1338	987
Figure_5c			Log2		STL	Single_Cell_Data		Tchourine_2018	ALL	0.013	495	46	0.181532	1107	1133
Figure_5c			Log2		STL	Single_Cell_Data		Tchourine_2018	ALL	0.013	495	47	0.184185	1194	992
Figure_5c			Log2		STL	Single_Cell_Data		Tchourine_2018	ALL	0.013	495	48	0.18317	1086	1107
Figure_5c			Log2		STL	Single_Cell_Data		Tchourine_2018	ALL	0.013	495	49	0.149689	1190	674
Figure_5c			Log2		STL	Single_Cell_Data		Tchourine_2018	ALL	0.013	495	50	0.161833	1246	870
Figure_5c			Log2		STL	Single_Cell_Data		Tchourine_2018	ALL	0.013	495	51	0.184303	1228	974
Figure_5c			Log2		STL	Single_Cell_Data		Tchourine_2018	NLIMGLN	0.013	500	42	0.144858	939	1211
Figure_5c			Log2		STL	Single_Cell_Data		Tchourine_2018	NLIMGLN	0.013	500	43	0.145098	987	1124
Figure_5c			Log2		STL	Single_Cell_Data		Tchourine_2018	NLIMGLN	0.013	500	44	0.180451	1070	1122
Figure_5c			Log2		STL	Single_Cell_Data		Tchourine_2018	NLIMGLN	0.013	500	45	0.1457	1063	783
Figure_5c			Log2		STL	Single_Cell_Data		Tchourine_2018	NLIMGLN	0.013	500	46	0.162128	856	1090
Figure_5c			Log2		STL	Single_Cell_Data		Tchourine_2018	NLIMGLN	0.013	500	47	0.173486	1003	818
Figure_5c			Log2		STL	Single_Cell_Data		Tchourine_2018	NLIMGLN	0.013	500	48	0.189408	963	1382
Figure_5c			Log2		STL	Single_Cell_Data		Tchourine_2018	NLIMGLN	0.013	500	49	0.171353	924	1078
Figure_5c			Log2		STL	Single_Cell_Data		Tchourine_2018	NLIMGLN	0.013	500	50	0.13855	933	843
Figure_5c			Log2		STL	Single_Cell_Data		Tchourine_2018	NLIMGLN	0.013	500	51	0.154078	1002	1151
Figure_5c			Log2		STL	Single_Cell_Data		Tchourine_2018	NLIMPRO	0.013	500	42	0.131355	901	795
Figure_5c			Log2		STL	Single_Cell_Data		Tchourine_2018	NLIMPRO	0.013	500	43	0.149952	911	863
Figure_5c			Log2		STL	Single_Cell_Data		Tchourine_2018	NLIMPRO	0.013	500	44	0.163439	891	1083
Figure_5c			Log2		STL	Single_Cell_Data		Tchourine_2018	NLIMPRO	0.013	500	45	0.142403	906	742
Figure_5c			Log2		STL	Single_Cell_Data		Tchourine_2018	NLIMPRO	0.013	500	46	0.137173	809	1103
Figure_5c			Log2		STL	Single_Cell_Data		Tchourine_2018	NLIMPRO	0.013	500	47	0.160934	953	705
Figure_5c			Log2		STL	Single_Cell_Data		Tchourine_2018	NLIMPRO	0.013	500	48	0.161694	799	1241
Figure_5c			Log2		STL	Single_Cell_Data		Tchourine_2018	NLIMPRO	0.013	500	49	0.140785	877	957
Figure_5c			Log2		STL	Single_Cell_Data		Tchourine_2018	NLIMPRO	0.013	500	50	0.142192	857	776
Figure_5c			Log2		STL	Single_Cell_Data		Tchourine_2018	NLIMPRO	0.013	500	51	0.16461	871	999
Figure_5c			Log2		STL	Single_Cell_Data		Tchourine_2018	NLIMNH4	0.013	500	42	0.111818	672	624
Figure_5c			Log2		STL	Single_Cell_Data		Tchourine_2018	NLIMNH4	0.013	500	43	0.105688	756	550
Figure_5c			Log2		STL	Single_Cell_Data		Tchourine_2018	NLIMNH4	0.013	500	44	0.140482	769	865
Figure_5c			Log2		STL	Single_Cell_Data		Tchourine_2018	NLIMNH4	0.013	500	45	0.126205	643	812
Figure_5c			Log2		STL	Single_Cell_Data		Tchourine_2018	NLIMNH4	0.013	500	46	0.147345	699	951
Figure_5c			Log2		STL	Single_Cell_Data		Tchourine_2018	NLIMNH4	0.013	500	47	0.132209	701	647
Figure_5c			Log2		STL	Single_Cell_Data		Tchourine_2018	NLIMNH4	0.013	500	48	0.15164	642	929
Figure_5c			Log2		STL	Single_Cell_Data		Tchourine_2018	NLIMNH4	0.013	500	49	0.132654	724	709
Figure_5c			Log2		STL	Single_Cell_Data		Tchourine_2018	NLIMNH4	0.013	500	50	0.126658	716	680
Figure_5c			Log2		STL	Single_Cell_Data		Tchourine_2018	NLIMNH4	0.013	500	51	0.142626	709	869
Figure_5c			Log2		STL	Single_Cell_Data		Tchourine_2018	NLIMUREA	0.013	500	42	0.127743	689	662
Figure_5c			Log2		STL	Single_Cell_Data		Tchourine_2018	NLIMUREA	0.013	500	43	0.117792	775	665
Figure_5c			Log2		STL	Single_Cell_Data		Tchourine_2018	NLIMUREA	0.013	500	44	0.147942	750	921
Figure_5c			Log2		STL	Single_Cell_Data		Tchourine_2018	NLIMUREA	0.013	500	45	0.133087	733	809
Figure_5c			Log2		STL	Single_Cell_Data		Tchourine_2018	NLIMUREA	0.013	500	46	0.147903	702	934
Figure_5c			Log2		STL	Single_Cell_Data		Tchourine_2018	NLIMUREA	0.013	500	47	0.150928	723	908
Figure_5c			Log2		STL	Single_Cell_Data		Tchourine_2018	NLIMUREA	0.013	500	48	0.14507	709	864
Figure_5c			Log2		STL	Single_Cell_Data		Tchourine_2018	NLIMUREA	0.013	500	49	0.13976	732	755
Figure_5c			Log2		STL	Single_Cell_Data		Tchourine_2018	NLIMUREA	0.013	500	50	0.141703	681	921
Figure_5c			Log2		STL	Single_Cell_Data		Tchourine_2018	NLIMUREA	0.013	500	51	0.14419	726	917
Figure_5c			Log2		STL	Single_Cell_Data		Tchourine_2018	YPD	0.013	500	42	0.109774	535	699
Figure_5c			Log2		STL	Single_Cell_Data		Tchourine_2018	YPD	0.013	500	43	0.114764	585	703
Figure_5c			Log2		STL	Single_Cell_Data		Tchourine_2018	YPD	0.013	500	44	0.141831	570	932
Figure_5c			Log2		STL	Single_Cell_Data		Tchourine_2018	YPD	0.013	500	45	0.101283	525	659
Figure_5c			Log2		STL	Single_Cell_Data		Tchourine_2018	YPD	0.013	500	46	0.121316	499	860
Figure_5c			Log2		STL	Single_Cell_Data		Tchourine_2018	YPD	0.013	500	47	0.120527	525	736
Figure_5c			Log2		STL	Single_Cell_Data		Tchourine_2018	YPD	0.013	500	48	0.1254	532	927
Figure_5c			Log2		STL	Single_Cell_Data		Tchourine_2018	YPD	0.013	500	49	0.113449	560	838
Figure_5c			Log2		STL	Single_Cell_Data		Tchourine_2018	YPD	0.013	500	50	0.114892	537	776
Figure_5c			Log2		STL	Single_Cell_Data		Tchourine_2018	YPD	0.013	500	51	0.11494	595	929
Figure_5c			Log2		STL	Single_Cell_Data		Tchourine_2018	RAPA	0.013	500	42	0.0994906	568	624
Figure_5c			Log2		STL	Single_Cell_Data		Tchourine_2018	RAPA	0.013	500	43	0.128157	665	998
Figure_5c			Log2		STL	Single_Cell_Data		Tchourine_2018	RAPA	0.013	500	44	0.135149	643	746
Figure_5c			Log2		STL	Single_Cell_Data		Tchourine_2018	RAPA	0.013	500	45	0.115923	577	823
Figure_5c			Log2		STL	Single_Cell_Data		Tchourine_2018	RAPA	0.013	500	46	0.146147	594	965
Figure_5c			Log2		STL	Single_Cell_Data		Tchourine_2018	RAPA	0.013	500	47	0.154268	654	893
Figure_5c			Log2		STL	Single_Cell_Data		Tchourine_2018	RAPA	0.013	500	48	0.135187	573	930
Figure_5c			Log2		STL	Single_Cell_Data		Tchourine_2018	RAPA	0.013	500	49	0.140967	689	885
Figure_5c			Log2		STL	Single_Cell_Data		Tchourine_2018	RAPA	0.013	500	50	0.117724	648	824
Figure_5c			Log2		STL	Single_Cell_Data		Tchourine_2018	RAPA	0.013	500	51	0.145695	636	936
Figure_5c			Log2		STL	Single_Cell_Data		Tchourine_2018	CSTARVE	0.013	500	42	0.100378	392	545
Figure_5c			Log2		STL	Single_Cell_Data		Tchourine_2018	CSTARVE	0.013	500	43	0.106711	452	636
Figure_5c			Log2		STL	Single_Cell_Data		Tchourine_2018	CSTARVE	0.013	500	44	0.12243	505	730
Figure_5c			Log2		STL	Single_Cell_Data		Tchourine_2018	CSTARVE	0.013	500	45	0.0987224	479	603
Figure_5c			Log2		STL	Single_Cell_Data		Tchourine_2018	CSTARVE	0.013	500	46	0.106384	432	645
Figure_5c			Log2		STL	Single_Cell_Data		Tchourine_2018	CSTARVE	0.013	500	47	0.0959348	395	539
Figure_5c			Log2		STL	Single_Cell_Data		Tchourine_2018	CSTARVE	0.013	500	48	0.12811	503	930
Figure_5c			Log2		STL	Single_Cell_Data		Tchourine_2018	CSTARVE	0.013	500	49	0.0926696	424	472
Figure_5c			Log2		STL	Single_Cell_Data		Tchourine_2018	CSTARVE	0.013	500	50	0.0767756	447	561
Figure_5c			Log2		STL	Single_Cell_Data		Tchourine_2018	CSTARVE	0.013	500	51	0.109172	461	544
Figure_5c			Log2		STL	Single_Cell_Data		Tchourine_2018	MMD	0.013	500	42	0.142752	864	947
Figure_5c			Log2		STL	Single_Cell_Data		Tchourine_2018	MMD	0.013	500	43	0.167707	898	1240
Figure_5c			Log2		STL	Single_Cell_Data		Tchourine_2018	MMD	0.013	500	44	0.191494	942	1479
Figure_5c			Log2		STL	Single_Cell_Data		Tchourine_2018	MMD	0.013	500	45	0.158213	838	1210
Figure_5c			Log2		STL	Single_Cell_Data		Tchourine_2018	MMD	0.013	500	46	0.15196	847	1101
Figure_5c			Log2		STL	Single_Cell_Data		Tchourine_2018	MMD	0.013	500	47	0.186123	967	1229
Figure_5c			Log2		STL	Single_Cell_Data		Tchourine_2018	MMD	0.013	500	48	0.177137	810	1360
Figure_5c			Log2		STL	Single_Cell_Data		Tchourine_2018	MMD	0.013	500	49	0.14725	825	939
Figure_5c			Log2		STL	Single_Cell_Data		Tchourine_2018	MMD	0.013	500	50	0.137262	815	861
Figure_5c			Log2		STL	Single_Cell_Data		Tchourine_2018	MMD	0.013	500	51	0.160842	884	1012
Figure_5c			Log2		STL	Single_Cell_Data		Tchourine_2018	MMETOH	0.013	500	42	0.15816	1458	990
Figure_5c			Log2		STL	Single_Cell_Data		Tchourine_2018	MMETOH	0.013	500	43	0.192195	1472	1611
Figure_5c			Log2		STL	Single_Cell_Data		Tchourine_2018	MMETOH	0.013	500	44	0.207857	1353	1529
Figure_5c			Log2		STL	Single_Cell_Data		Tchourine_2018	MMETOH	0.013	500	45	0.158342	1498	1076
Figure_5c			Log2		STL	Single_Cell_Data		Tchourine_2018	MMETOH	0.013	500	46	0.182662	1314	1447
Figure_5c			Log2		STL	Single_Cell_Data		Tchourine_2018	MMETOH	0.013	500	47	0.200486	1361	1133
Figure_5c			Log2		STL	Single_Cell_Data		Tchourine_2018	MMETOH	0.013	500	48	0.204179	1362	1572
Figure_5c			Log2		STL	Single_Cell_Data		Tchourine_2018	MMETOH	0.013	500	49	0.163263	1336	1070
Figure_5c			Log2		STL	Single_Cell_Data		Tchourine_2018	MMETOH	0.013	500	50	0.166893	1501	1142
Figure_5c			Log2		STL	Single_Cell_Data		Tchourine_2018	MMETOH	0.013	500	51	0.176738	1244	1118
Figure_5c			Log2		STL	Single_Cell_Data		Tchourine_2018	DIAUXY	0.013	500	42	0.0726694	567	79
Figure_5c			Log2		STL	Single_Cell_Data		Tchourine_2018	DIAUXY	0.013	500	43	0.105867	615	660
Figure_5c			Log2		STL	Single_Cell_Data		Tchourine_2018	DIAUXY	0.013	500	44	0.087361	544	490
Figure_5c			Log2		STL	Single_Cell_Data		Tchourine_2018	DIAUXY	0.013	500	45	0.0781979	643	375
Figure_5c			Log2		STL	Single_Cell_Data		Tchourine_2018	DIAUXY	0.013	500	46	0.0881483	547	435
Figure_5c			Log2		STL	Single_Cell_Data		Tchourine_2018	DIAUXY	0.013	500	47	0.123127	684	703
Figure_5c			Log2		STL	Single_Cell_Data		Tchourine_2018	DIAUXY	0.013	500	48	0.113567	634	549
Figure_5c			Log2		STL	Single_Cell_Data		Tchourine_2018	DIAUXY	0.013	500	49	0.0996973	604	426
Figure_5c			Log2		STL	Single_Cell_Data		Tchourine_2018	DIAUXY	0.013	500	50	0.0950064	556	658
Figure_5c			Log2		STL	Single_Cell_Data		Tchourine_2018	DIAUXY	0.013	500	51	0.0990347	600	501
Figure_5c			Log2		STL	Single_Cell_Data		Tchourine_2018	YPETOH	0.013	500	42	0.114139	810	600
Figure_5c			Log2		STL	Single_Cell_Data		Tchourine_2018	YPETOH	0.013	500	43	0.140254	914	1103
Figure_5c			Log2		STL	Single_Cell_Data		Tchourine_2018	YPETOH	0.013	500	44	0.142553	903	1046
Figure_5c			Log2		STL	Single_Cell_Data		Tchourine_2018	YPETOH	0.013	500	45	0.12772	923	869
Figure_5c			Log2		STL	Single_Cell_Data		Tchourine_2018	YPETOH	0.013	500	46	0.124257	838	774
Figure_5c			Log2		STL	Single_Cell_Data		Tchourine_2018	YPETOH	0.013	500	47	0.14045	934	861
Figure_5c			Log2		STL	Single_Cell_Data		Tchourine_2018	YPETOH	0.013	500	48	0.150063	917	911
Figure_5c			Log2		STL	Single_Cell_Data		Tchourine_2018	YPETOH	0.013	500	49	0.125309	900	748
Figure_5c			Log2		STL	Single_Cell_Data		Tchourine_2018	YPETOH	0.013	500	50	0.104235	935	640
Figure_5c			Log2		STL	Single_Cell_Data		Tchourine_2018	YPETOH	0.013	500	51	0.146134	905	1181
Figure_5d			Log2		STL	Single_Cell_Data	YEASTRACT_2019	Tchourine_2018	ALL	1	38225	52	0.161461	12704	1354
Figure_5d			Log2		STL	Single_Cell_Data	YEASTRACT_2019	Tchourine_2018	ALL	1	38225	53	0.14849	12661	1076
Figure_5d			Log2		STL	Single_Cell_Data	YEASTRACT_2019	Tchourine_2018	ALL	1	38225	54	0.156321	12644	1517
Figure_5d			Log2		STL	Single_Cell_Data	YEASTRACT_2019	Tchourine_2018	ALL	1	38225	55	0.181527	12644	1188
Figure_5d			Log2		STL	Single_Cell_Data	YEASTRACT_2019	Tchourine_2018	ALL	1	38225	56	0.150766	12676	870
Figure_5d			Log2		STL	Single_Cell_Data	YEASTRACT_2019	Tchourine_2018	ALL	1	38225	57	0.164295	12734	1339
Figure_5d			Log2		STL	Single_Cell_Data	YEASTRACT_2019	Tchourine_2018	ALL	1	38225	58	0.171938	12567	1315
Figure_5d			Log2		STL	Single_Cell_Data	YEASTRACT_2019	Tchourine_2018	ALL	1	38225	59	0.165663	12581	1356
Figure_5d			Log2		STL	Single_Cell_Data	YEASTRACT_2019	Tchourine_2018	ALL	1	38225	60	0.159067	12394	936
Figure_5d			Log2		STL	Single_Cell_Data	YEASTRACT_2019	Tchourine_2018	ALL	1	38225	61	0.169543	12571	1051
Figure_5d			Log2		MTL-AMUSR	Single_Cell_Data	YEASTRACT_2019	Tchourine_2018	ALL	1	38225	52	0.224518	1268	3108
Figure_5d			Log2		MTL-AMUSR	Single_Cell_Data	YEASTRACT_2019	Tchourine_2018	ALL	1	38225	53	0.230932	1253	3378
Figure_5d			Log2		MTL-AMUSR	Single_Cell_Data	YEASTRACT_2019	Tchourine_2018	ALL	1	38225	54	0.243367	1278	3508
Figure_5d			Log2		MTL-AMUSR	Single_Cell_Data	YEASTRACT_2019	Tchourine_2018	ALL	1	38225	55	0.232812	1220	3386
Figure_5d			Log2		MTL-AMUSR	Single_Cell_Data	YEASTRACT_2019	Tchourine_2018	ALL	1	38225	56	0.238473	1259	3456
Figure_5d			Log2		MTL-AMUSR	Single_Cell_Data	YEASTRACT_2019	Tchourine_2018	ALL	1	38225	57	0.24231	1267	3441
Figure_5d			Log2		MTL-AMUSR	Single_Cell_Data	YEASTRACT_2019	Tchourine_2018	ALL	1	38225	58	0.241881	1266	3423
Figure_5d			Log2		MTL-AMUSR	Single_Cell_Data	YEASTRACT_2019	Tchourine_2018	ALL	1	38225	59	0.229896	1304	3244
Figure_5d			Log2		MTL-AMUSR	Single_Cell_Data	YEASTRACT_2019	Tchourine_2018	ALL	1	38225	60	0.251368	1219	3488
Figure_5d			Log2		MTL-AMUSR	Single_Cell_Data	YEASTRACT_2019	Tchourine_2018	ALL	1	38225	61	0.233237	1263	3475
Figure_5d			Log2		MTL-BBSR	Single_Cell_Data	YEASTRACT_2019	Tchourine_2018	ALL	1	38225	52	0.248216	728	2903
Figure_5d			Log2		MTL-BBSR	Single_Cell_Data	YEASTRACT_2019	Tchourine_2018	ALL	1	38225	53	0.235127	741	3303
Figure_5d			Log2		MTL-BBSR	Single_Cell_Data	YEASTRACT_2019	Tchourine_2018	ALL	1	38225	54	0.25462	730	3583
Figure_5d			Log2		MTL-BBSR	Single_Cell_Data	YEASTRACT_2019	Tchourine_2018	ALL	1	38225	55	0.259016	721	3007
Figure_5d			Log2		MTL-BBSR	Single_Cell_Data	YEASTRACT_2019	Tchourine_2018	ALL	1	38225	56	0.259421	755	3699
Figure_5d			Log2		MTL-BBSR	Single_Cell_Data	YEASTRACT_2019	Tchourine_2018	ALL	1	38225	57	0.237769	717	2914
Figure_5d			Log2		MTL-BBSR	Single_Cell_Data	YEASTRACT_2019	Tchourine_2018	ALL	1	38225	58	0.244914	751	3359
Figure_5d			Log2		MTL-BBSR	Single_Cell_Data	YEASTRACT_2019	Tchourine_2018	ALL	1	38225	59	0.23099	717	2848
Figure_5d			Log2		MTL-BBSR	Single_Cell_Data	YEASTRACT_2019	Tchourine_2018	ALL	1	38225	60	0.249196	702	2909
Figure_5d			Log2		MTL-BBSR	Single_Cell_Data	YEASTRACT_2019	Tchourine_2018	ALL	1	38225	61	0.240947	730	2969
Figure_5e			Log2		MTL-BBSR	Single_Cell_Data	YEASTRACT_2019	Tchourine_2018	DIAUXY	1	3332	52	0.101513
Figure_5e			Log2		MTL-BBSR	Single_Cell_Data	YEASTRACT_2019	Tchourine_2018	YPD	1	11037	52	0.150588
Figure_5e			Log2		MTL-BBSR	Single_Cell_Data	YEASTRACT_2019	Tchourine_2018	NLIMGLN	1	1644	52	0.155958
Figure_5e			Log2		MTL-BBSR	Single_Cell_Data	YEASTRACT_2019	Tchourine_2018	MMD	1	1894	52	0.189347
Figure_5e			Log2		MTL-BBSR	Single_Cell_Data	YEASTRACT_2019	Tchourine_2018	CSTARVE	1	3549	52	0.127063
Figure_5e			Log2		MTL-BBSR	Single_Cell_Data	YEASTRACT_2019	Tchourine_2018	RAPA	1	11805	52	0.166852
Figure_5e			Log2		MTL-BBSR	Single_Cell_Data	YEASTRACT_2019	Tchourine_2018	MMETOH	1	581	52	0.160361
Figure_5e			Log2		MTL-BBSR	Single_Cell_Data	YEASTRACT_2019	Tchourine_2018	NLIMUREA	1	992	52	0.14414
Figure_5e			Log2		MTL-BBSR	Single_Cell_Data	YEASTRACT_2019	Tchourine_2018	YPETOH	1	1427	52	0.137148
Figure_5e			Log2		MTL-BBSR	Single_Cell_Data	YEASTRACT_2019	Tchourine_2018	NLIMPRO	1	853	52	0.118194
Figure_5e			Log2		MTL-BBSR	Single_Cell_Data	YEASTRACT_2019	Tchourine_2018	NLIMNH4	1	1111	52	0.127064
Figure_5e			Log2		MTL-BBSR	Single_Cell_Data	YEASTRACT_2019	Tchourine_2018	ALL	1	38225	52	0.248216
Figure_5e			Log2		MTL-BBSR	Single_Cell_Data	YEASTRACT_2019	Tchourine_2018	CSTARVE	1	3549	53	0.133543
Figure_5e			Log2		MTL-BBSR	Single_Cell_Data	YEASTRACT_2019	Tchourine_2018	RAPA	1	11805	53	0.160873
Figure_5e			Log2		MTL-BBSR	Single_Cell_Data	YEASTRACT_2019	Tchourine_2018	DIAUXY	1	3332	53	0.0825669
Figure_5e			Log2		MTL-BBSR	Single_Cell_Data	YEASTRACT_2019	Tchourine_2018	NLIMGLN	1	1644	53	0.147339
Figure_5e			Log2		MTL-BBSR	Single_Cell_Data	YEASTRACT_2019	Tchourine_2018	NLIMUREA	1	992	53	0.135465
Figure_5e			Log2		MTL-BBSR	Single_Cell_Data	YEASTRACT_2019	Tchourine_2018	YPD	1	11037	53	0.150457
Figure_5e			Log2		MTL-BBSR	Single_Cell_Data	YEASTRACT_2019	Tchourine_2018	NLIMPRO	1	853	53	0.120575
Figure_5e			Log2		MTL-BBSR	Single_Cell_Data	YEASTRACT_2019	Tchourine_2018	YPETOH	1	1427	53	0.116433
Figure_5e			Log2		MTL-BBSR	Single_Cell_Data	YEASTRACT_2019	Tchourine_2018	MMD	1	1894	53	0.167994
Figure_5e			Log2		MTL-BBSR	Single_Cell_Data	YEASTRACT_2019	Tchourine_2018	NLIMNH4	1	1111	53	0.11733
Figure_5e			Log2		MTL-BBSR	Single_Cell_Data	YEASTRACT_2019	Tchourine_2018	MMETOH	1	581	53	0.143296
Figure_5e			Log2		MTL-BBSR	Single_Cell_Data	YEASTRACT_2019	Tchourine_2018	ALL	1	38225	53	0.235127
Figure_5e			Log2		MTL-BBSR	Single_Cell_Data	YEASTRACT_2019	Tchourine_2018	YPD	1	11037	54	0.147966
Figure_5e			Log2		MTL-BBSR	Single_Cell_Data	YEASTRACT_2019	Tchourine_2018	MMD	1	1894	54	0.186716
Figure_5e			Log2		MTL-BBSR	Single_Cell_Data	YEASTRACT_2019	Tchourine_2018	NLIMUREA	1	992	54	0.145121
Figure_5e			Log2		MTL-BBSR	Single_Cell_Data	YEASTRACT_2019	Tchourine_2018	CSTARVE	1	3549	54	0.111244
Figure_5e			Log2		MTL-BBSR	Single_Cell_Data	YEASTRACT_2019	Tchourine_2018	RAPA	1	11805	54	0.162266
Figure_5e			Log2		MTL-BBSR	Single_Cell_Data	YEASTRACT_2019	Tchourine_2018	NLIMGLN	1	1644	54	0.155911
Figure_5e			Log2		MTL-BBSR	Single_Cell_Data	YEASTRACT_2019	Tchourine_2018	NLIMNH4	1	1111	54	0.131645
Figure_5e			Log2		MTL-BBSR	Single_Cell_Data	YEASTRACT_2019	Tchourine_2018	MMETOH	1	581	54	0.168723
Figure_5e			Log2		MTL-BBSR	Single_Cell_Data	YEASTRACT_2019	Tchourine_2018	DIAUXY	1	3332	54	0.0978758
Figure_5e			Log2		MTL-BBSR	Single_Cell_Data	YEASTRACT_2019	Tchourine_2018	YPETOH	1	1427	54	0.128756
Figure_5e			Log2		MTL-BBSR	Single_Cell_Data	YEASTRACT_2019	Tchourine_2018	NLIMPRO	1	853	54	0.150036
Figure_5e			Log2		MTL-BBSR	Single_Cell_Data	YEASTRACT_2019	Tchourine_2018	ALL	1	38225	54	0.25462
Figure_5e			Log2		MTL-BBSR	Single_Cell_Data	YEASTRACT_2019	Tchourine_2018	NLIMGLN	1	1644	55	0.164725
Figure_5e			Log2		MTL-BBSR	Single_Cell_Data	YEASTRACT_2019	Tchourine_2018	YPD	1	11037	55	0.158948
Figure_5e			Log2		MTL-BBSR	Single_Cell_Data	YEASTRACT_2019	Tchourine_2018	RAPA	1	11805	55	0.181666
Figure_5e			Log2		MTL-BBSR	Single_Cell_Data	YEASTRACT_2019	Tchourine_2018	CSTARVE	1	3549	55	0.131192
Figure_5e			Log2		MTL-BBSR	Single_Cell_Data	YEASTRACT_2019	Tchourine_2018	DIAUXY	1	3332	55	0.0944541
Figure_5e			Log2		MTL-BBSR	Single_Cell_Data	YEASTRACT_2019	Tchourine_2018	YPETOH	1	1427	55	0.142834
Figure_5e			Log2		MTL-BBSR	Single_Cell_Data	YEASTRACT_2019	Tchourine_2018	MMD	1	1894	55	0.195611
Figure_5e			Log2		MTL-BBSR	Single_Cell_Data	YEASTRACT_2019	Tchourine_2018	NLIMUREA	1	992	55	0.152418
Figure_5e			Log2		MTL-BBSR	Single_Cell_Data	YEASTRACT_2019	Tchourine_2018	NLIMPRO	1	853	55	0.14132
Figure_5e			Log2		MTL-BBSR	Single_Cell_Data	YEASTRACT_2019	Tchourine_2018	NLIMNH4	1	1111	55	0.137635
Figure_5e			Log2		MTL-BBSR	Single_Cell_Data	YEASTRACT_2019	Tchourine_2018	MMETOH	1	581	55	0.173273
Figure_5e			Log2		MTL-BBSR	Single_Cell_Data	YEASTRACT_2019	Tchourine_2018	ALL	1	38225	55	0.259016
Figure_5e			Log2		MTL-BBSR	Single_Cell_Data	YEASTRACT_2019	Tchourine_2018	YPD	1	11037	56	0.149025
Figure_5e			Log2		MTL-BBSR	Single_Cell_Data	YEASTRACT_2019	Tchourine_2018	RAPA	1	11805	56	0.166912
Figure_5e			Log2		MTL-BBSR	Single_Cell_Data	YEASTRACT_2019	Tchourine_2018	NLIMNH4	1	1111	56	0.123824
Figure_5e			Log2		MTL-BBSR	Single_Cell_Data	YEASTRACT_2019	Tchourine_2018	DIAUXY	1	3332	56	0.102231
Figure_5e			Log2		MTL-BBSR	Single_Cell_Data	YEASTRACT_2019	Tchourine_2018	NLIMGLN	1	1644	56	0.160149
Figure_5e			Log2		MTL-BBSR	Single_Cell_Data	YEASTRACT_2019	Tchourine_2018	CSTARVE	1	3549	56	0.140829
Figure_5e			Log2		MTL-BBSR	Single_Cell_Data	YEASTRACT_2019	Tchourine_2018	MMETOH	1	581	56	0.169791
Figure_5e			Log2		MTL-BBSR	Single_Cell_Data	YEASTRACT_2019	Tchourine_2018	NLIMPRO	1	853	56	0.136708
Figure_5e			Log2		MTL-BBSR	Single_Cell_Data	YEASTRACT_2019	Tchourine_2018	NLIMUREA	1	992	56	0.13824
Figure_5e			Log2		MTL-BBSR	Single_Cell_Data	YEASTRACT_2019	Tchourine_2018	YPETOH	1	1427	56	0.126299
Figure_5e			Log2		MTL-BBSR	Single_Cell_Data	YEASTRACT_2019	Tchourine_2018	MMD	1	1894	56	0.179004
Figure_5e			Log2		MTL-BBSR	Single_Cell_Data	YEASTRACT_2019	Tchourine_2018	ALL	1	38225	56	0.259421
Figure_5e			Log2		MTL-BBSR	Single_Cell_Data	YEASTRACT_2019	Tchourine_2018	YPETOH	1	1427	57	0.118516
Figure_5e			Log2		MTL-BBSR	Single_Cell_Data	YEASTRACT_2019	Tchourine_2018	RAPA	1	11805	57	0.178066
Figure_5e			Log2		MTL-BBSR	Single_Cell_Data	YEASTRACT_2019	Tchourine_2018	YPD	1	11037	57	0.151667
Figure_5e			Log2		MTL-BBSR	Single_Cell_Data	YEASTRACT_2019	Tchourine_2018	DIAUXY	1	3332	57	0.0866956
Figure_5e			Log2		MTL-BBSR	Single_Cell_Data	YEASTRACT_2019	Tchourine_2018	NLIMUREA	1	992	57	0.144926
Figure_5e			Log2		MTL-BBSR	Single_Cell_Data	YEASTRACT_2019	Tchourine_2018	CSTARVE	1	3549	57	0.0897659
Figure_5e			Log2		MTL-BBSR	Single_Cell_Data	YEASTRACT_2019	Tchourine_2018	MMD	1	1894	57	0.183722
Figure_5e			Log2		MTL-BBSR	Single_Cell_Data	YEASTRACT_2019	Tchourine_2018	NLIMNH4	1	1111	57	0.123662
Figure_5e			Log2		MTL-BBSR	Single_Cell_Data	YEASTRACT_2019	Tchourine_2018	MMETOH	1	581	57	0.148142
Figure_5e			Log2		MTL-BBSR	Single_Cell_Data	YEASTRACT_2019	Tchourine_2018	NLIMPRO	1	853	57	0.128266
Figure_5e			Log2		MTL-BBSR	Single_Cell_Data	YEASTRACT_2019	Tchourine_2018	NLIMGLN	1	1644	57	0.149871
Figure_5e			Log2		MTL-BBSR	Single_Cell_Data	YEASTRACT_2019	Tchourine_2018	ALL	1	38225	57	0.237769
Figure_5e			Log2		MTL-BBSR	Single_Cell_Data	YEASTRACT_2019	Tchourine_2018	NLIMNH4	1	1111	58	0.147993
Figure_5e			Log2		MTL-BBSR	Single_Cell_Data	YEASTRACT_2019	Tchourine_2018	YPD	1	11037	58	0.170697
Figure_5e			Log2		MTL-BBSR	Single_Cell_Data	YEASTRACT_2019	Tchourine_2018	RAPA	1	11805	58	0.179557
Figure_5e			Log2		MTL-BBSR	Single_Cell_Data	YEASTRACT_2019	Tchourine_2018	DIAUXY	1	3332	58	0.117579
Figure_5e			Log2		MTL-BBSR	Single_Cell_Data	YEASTRACT_2019	Tchourine_2018	CSTARVE	1	3549	58	0.153755
Figure_5e			Log2		MTL-BBSR	Single_Cell_Data	YEASTRACT_2019	Tchourine_2018	MMD	1	1894	58	0.189448
Figure_5e			Log2		MTL-BBSR	Single_Cell_Data	YEASTRACT_2019	Tchourine_2018	YPETOH	1	1427	58	0.152119
Figure_5e			Log2		MTL-BBSR	Single_Cell_Data	YEASTRACT_2019	Tchourine_2018	NLIMPRO	1	853	58	0.149017
Figure_5e			Log2		MTL-BBSR	Single_Cell_Data	YEASTRACT_2019	Tchourine_2018	NLIMGLN	1	1644	58	0.162369
Figure_5e			Log2		MTL-BBSR	Single_Cell_Data	YEASTRACT_2019	Tchourine_2018	NLIMUREA	1	992	58	0.154739
Figure_5e			Log2		MTL-BBSR	Single_Cell_Data	YEASTRACT_2019	Tchourine_2018	MMETOH	1	581	58	0.176702
Figure_5e			Log2		MTL-BBSR	Single_Cell_Data	YEASTRACT_2019	Tchourine_2018	ALL	1	38225	58	0.244914
Figure_5e			Log2		MTL-BBSR	Single_Cell_Data	YEASTRACT_2019	Tchourine_2018	DIAUXY	1	3332	59	0.10861
Figure_5e			Log2		MTL-BBSR	Single_Cell_Data	YEASTRACT_2019	Tchourine_2018	YPD	1	11037	59	0.148438
Figure_5e			Log2		MTL-BBSR	Single_Cell_Data	YEASTRACT_2019	Tchourine_2018	YPETOH	1	1427	59	0.151858
Figure_5e			Log2		MTL-BBSR	Single_Cell_Data	YEASTRACT_2019	Tchourine_2018	MMETOH	1	581	59	0.140504
Figure_5e			Log2		MTL-BBSR	Single_Cell_Data	YEASTRACT_2019	Tchourine_2018	NLIMGLN	1	1644	59	0.146759
Figure_5e			Log2		MTL-BBSR	Single_Cell_Data	YEASTRACT_2019	Tchourine_2018	RAPA	1	11805	59	0.171556
Figure_5e			Log2		MTL-BBSR	Single_Cell_Data	YEASTRACT_2019	Tchourine_2018	CSTARVE	1	3549	59	0.122334
Figure_5e			Log2		MTL-BBSR	Single_Cell_Data	YEASTRACT_2019	Tchourine_2018	NLIMUREA	1	992	59	0.151339
Figure_5e			Log2		MTL-BBSR	Single_Cell_Data	YEASTRACT_2019	Tchourine_2018	NLIMNH4	1	1111	59	0.143768
Figure_5e			Log2		MTL-BBSR	Single_Cell_Data	YEASTRACT_2019	Tchourine_2018	MMD	1	1894	59	0.184775
Figure_5e			Log2		MTL-BBSR	Single_Cell_Data	YEASTRACT_2019	Tchourine_2018	NLIMPRO	1	853	59	0.121135
Figure_5e			Log2		MTL-BBSR	Single_Cell_Data	YEASTRACT_2019	Tchourine_2018	ALL	1	38225	59	0.23099
Figure_5e			Log2		MTL-BBSR	Single_Cell_Data	YEASTRACT_2019	Tchourine_2018	YPETOH	1	1427	60	0.143509
Figure_5e			Log2		MTL-BBSR	Single_Cell_Data	YEASTRACT_2019	Tchourine_2018	RAPA	1	11805	60	0.16826
Figure_5e			Log2		MTL-BBSR	Single_Cell_Data	YEASTRACT_2019	Tchourine_2018	CSTARVE	1	3549	60	0.145063
Figure_5e			Log2		MTL-BBSR	Single_Cell_Data	YEASTRACT_2019	Tchourine_2018	MMETOH	1	581	60	0.161483
Figure_5e			Log2		MTL-BBSR	Single_Cell_Data	YEASTRACT_2019	Tchourine_2018	DIAUXY	1	3332	60	0.0961279
Figure_5e			Log2		MTL-BBSR	Single_Cell_Data	YEASTRACT_2019	Tchourine_2018	YPD	1	11037	60	0.163696
Figure_5e			Log2		MTL-BBSR	Single_Cell_Data	YEASTRACT_2019	Tchourine_2018	NLIMGLN	1	1644	60	0.140837
Figure_5e			Log2		MTL-BBSR	Single_Cell_Data	YEASTRACT_2019	Tchourine_2018	NLIMUREA	1	992	60	0.153685
Figure_5e			Log2		MTL-BBSR	Single_Cell_Data	YEASTRACT_2019	Tchourine_2018	MMD	1	1894	60	0.176848
Figure_5e			Log2		MTL-BBSR	Single_Cell_Data	YEASTRACT_2019	Tchourine_2018	NLIMNH4	1	1111	60	0.137076
Figure_5e			Log2		MTL-BBSR	Single_Cell_Data	YEASTRACT_2019	Tchourine_2018	NLIMPRO	1	853	60	0.120283
Figure_5e			Log2		MTL-BBSR	Single_Cell_Data	YEASTRACT_2019	Tchourine_2018	ALL	1	38225	60	0.249196
Figure_5e			Log2		MTL-BBSR	Single_Cell_Data	YEASTRACT_2019	Tchourine_2018	NLIMGLN	1	1644	61	0.150937
Figure_5e			Log2		MTL-BBSR	Single_Cell_Data	YEASTRACT_2019	Tchourine_2018	YPD	1	11037	61	0.172263
Figure_5e			Log2		MTL-BBSR	Single_Cell_Data	YEASTRACT_2019	Tchourine_2018	MMD	1	1894	61	0.195203
Figure_5e			Log2		MTL-BBSR	Single_Cell_Data	YEASTRACT_2019	Tchourine_2018	RAPA	1	11805	61	0.161957
Figure_5e			Log2		MTL-BBSR	Single_Cell_Data	YEASTRACT_2019	Tchourine_2018	NLIMUREA	1	992	61	0.154564
Figure_5e			Log2		MTL-BBSR	Single_Cell_Data	YEASTRACT_2019	Tchourine_2018	YPETOH	1	1427	61	0.126355
Figure_5e			Log2		MTL-BBSR	Single_Cell_Data	YEASTRACT_2019	Tchourine_2018	CSTARVE	1	3549	61	0.0927477
Figure_5e			Log2		MTL-BBSR	Single_Cell_Data	YEASTRACT_2019	Tchourine_2018	DIAUXY	1	3332	61	0.0854475
Figure_5e			Log2		MTL-BBSR	Single_Cell_Data	YEASTRACT_2019	Tchourine_2018	NLIMPRO	1	853	61	0.144344
Figure_5e			Log2		MTL-BBSR	Single_Cell_Data	YEASTRACT_2019	Tchourine_2018	NLIMNH4	1	1111	61	0.150757
Figure_5e			Log2		MTL-BBSR	Single_Cell_Data	YEASTRACT_2019	Tchourine_2018	MMETOH	1	581	61	0.140228
Figure_5e			Log2		MTL-BBSR	Single_Cell_Data	YEASTRACT_2019	Tchourine_2018	ALL	1	38225	61	0.240947
Figure_5e			Log2		MTL-AMUSR	Single_Cell_Data	YEASTRACT_2019	Tchourine_2018	DIAUXY	1	3332	52	0.128969
Figure_5e			Log2		MTL-AMUSR	Single_Cell_Data	YEASTRACT_2019	Tchourine_2018	YPD	1	11037	52	0.120622
Figure_5e			Log2		MTL-AMUSR	Single_Cell_Data	YEASTRACT_2019	Tchourine_2018	NLIMGLN	1	1644	52	0.162611
Figure_5e			Log2		MTL-AMUSR	Single_Cell_Data	YEASTRACT_2019	Tchourine_2018	MMD	1	1894	52	0.183274
Figure_5e			Log2		MTL-AMUSR	Single_Cell_Data	YEASTRACT_2019	Tchourine_2018	CSTARVE	1	3549	52	0.115865
Figure_5e			Log2		MTL-AMUSR	Single_Cell_Data	YEASTRACT_2019	Tchourine_2018	RAPA	1	11805	52	0.137305
Figure_5e			Log2		MTL-AMUSR	Single_Cell_Data	YEASTRACT_2019	Tchourine_2018	MMETOH	1	581	52	0.129426
Figure_5e			Log2		MTL-AMUSR	Single_Cell_Data	YEASTRACT_2019	Tchourine_2018	NLIMUREA	1	992	52	0.120704
Figure_5e			Log2		MTL-AMUSR	Single_Cell_Data	YEASTRACT_2019	Tchourine_2018	YPETOH	1	1427	52	0.116047
Figure_5e			Log2		MTL-AMUSR	Single_Cell_Data	YEASTRACT_2019	Tchourine_2018	NLIMPRO	1	853	52	0.0966617
Figure_5e			Log2		MTL-AMUSR	Single_Cell_Data	YEASTRACT_2019	Tchourine_2018	NLIMNH4	1	1111	52	0.109646
Figure_5e			Log2		MTL-AMUSR	Single_Cell_Data	YEASTRACT_2019	Tchourine_2018	ALL	1	38225	52	0.224518
Figure_5e			Log2		MTL-AMUSR	Single_Cell_Data	YEASTRACT_2019	Tchourine_2018	CSTARVE	1	3549	53	0.126664
Figure_5e			Log2		MTL-AMUSR	Single_Cell_Data	YEASTRACT_2019	Tchourine_2018	RAPA	1	11805	53	0.118181
Figure_5e			Log2		MTL-AMUSR	Single_Cell_Data	YEASTRACT_2019	Tchourine_2018	DIAUXY	1	3332	53	0.113993
Figure_5e			Log2		MTL-AMUSR	Single_Cell_Data	YEASTRACT_2019	Tchourine_2018	NLIMGLN	1	1644	53	0.146025
Figure_5e			Log2		MTL-AMUSR	Single_Cell_Data	YEASTRACT_2019	Tchourine_2018	NLIMUREA	1	992	53	0.103365
Figure_5e			Log2		MTL-AMUSR	Single_Cell_Data	YEASTRACT_2019	Tchourine_2018	YPD	1	11037	53	0.113668
Figure_5e			Log2		MTL-AMUSR	Single_Cell_Data	YEASTRACT_2019	Tchourine_2018	NLIMPRO	1	853	53	0.0830415
Figure_5e			Log2		MTL-AMUSR	Single_Cell_Data	YEASTRACT_2019	Tchourine_2018	YPETOH	1	1427	53	0.101649
Figure_5e			Log2		MTL-AMUSR	Single_Cell_Data	YEASTRACT_2019	Tchourine_2018	MMD	1	1894	53	0.164669
Figure_5e			Log2		MTL-AMUSR	Single_Cell_Data	YEASTRACT_2019	Tchourine_2018	NLIMNH4	1	1111	53	0.0967869
Figure_5e			Log2		MTL-AMUSR	Single_Cell_Data	YEASTRACT_2019	Tchourine_2018	MMETOH	1	581	53	0.103221
Figure_5e			Log2		MTL-AMUSR	Single_Cell_Data	YEASTRACT_2019	Tchourine_2018	ALL	1	38225	53	0.230932
Figure_5e			Log2		MTL-AMUSR	Single_Cell_Data	YEASTRACT_2019	Tchourine_2018	YPD	1	11037	54	0.121103
Figure_5e			Log2		MTL-AMUSR	Single_Cell_Data	YEASTRACT_2019	Tchourine_2018	MMD	1	1894	54	0.19241
Figure_5e			Log2		MTL-AMUSR	Single_Cell_Data	YEASTRACT_2019	Tchourine_2018	NLIMUREA	1	992	54	0.124108
Figure_5e			Log2		MTL-AMUSR	Single_Cell_Data	YEASTRACT_2019	Tchourine_2018	CSTARVE	1	3549	54	0.104847
Figure_5e			Log2		MTL-AMUSR	Single_Cell_Data	YEASTRACT_2019	Tchourine_2018	RAPA	1	11805	54	0.124502
Figure_5e			Log2		MTL-AMUSR	Single_Cell_Data	YEASTRACT_2019	Tchourine_2018	NLIMGLN	1	1644	54	0.173018
Figure_5e			Log2		MTL-AMUSR	Single_Cell_Data	YEASTRACT_2019	Tchourine_2018	NLIMNH4	1	1111	54	0.133265
Figure_5e			Log2		MTL-AMUSR	Single_Cell_Data	YEASTRACT_2019	Tchourine_2018	MMETOH	1	581	54	0.120907
Figure_5e			Log2		MTL-AMUSR	Single_Cell_Data	YEASTRACT_2019	Tchourine_2018	DIAUXY	1	3332	54	0.139165
Figure_5e			Log2		MTL-AMUSR	Single_Cell_Data	YEASTRACT_2019	Tchourine_2018	YPETOH	1	1427	54	0.109258
Figure_5e			Log2		MTL-AMUSR	Single_Cell_Data	YEASTRACT_2019	Tchourine_2018	NLIMPRO	1	853	54	0.115451
Figure_5e			Log2		MTL-AMUSR	Single_Cell_Data	YEASTRACT_2019	Tchourine_2018	ALL	1	38225	54	0.243367
Figure_5e			Log2		MTL-AMUSR	Single_Cell_Data	YEASTRACT_2019	Tchourine_2018	NLIMGLN	1	1644	55	0.151995
Figure_5e			Log2		MTL-AMUSR	Single_Cell_Data	YEASTRACT_2019	Tchourine_2018	YPD	1	11037	55	0.125929
Figure_5e			Log2		MTL-AMUSR	Single_Cell_Data	YEASTRACT_2019	Tchourine_2018	RAPA	1	11805	55	0.142736
Figure_5e			Log2		MTL-AMUSR	Single_Cell_Data	YEASTRACT_2019	Tchourine_2018	CSTARVE	1	3549	55	0.116276
Figure_5e			Log2		MTL-AMUSR	Single_Cell_Data	YEASTRACT_2019	Tchourine_2018	DIAUXY	1	3332	55	0.13288
Figure_5e			Log2		MTL-AMUSR	Single_Cell_Data	YEASTRACT_2019	Tchourine_2018	YPETOH	1	1427	55	0.120145
Figure_5e			Log2		MTL-AMUSR	Single_Cell_Data	YEASTRACT_2019	Tchourine_2018	MMD	1	1894	55	0.177942
Figure_5e			Log2		MTL-AMUSR	Single_Cell_Data	YEASTRACT_2019	Tchourine_2018	NLIMUREA	1	992	55	0.127255
Figure_5e			Log2		MTL-AMUSR	Single_Cell_Data	YEASTRACT_2019	Tchourine_2018	NLIMPRO	1	853	55	0.105513
Figure_5e			Log2		MTL-AMUSR	Single_Cell_Data	YEASTRACT_2019	Tchourine_2018	NLIMNH4	1	1111	55	0.121691
Figure_5e			Log2		MTL-AMUSR	Single_Cell_Data	YEASTRACT_2019	Tchourine_2018	MMETOH	1	581	55	0.116593
Figure_5e			Log2		MTL-AMUSR	Single_Cell_Data	YEASTRACT_2019	Tchourine_2018	ALL	1	38225	55	0.232812
Figure_5e			Log2		MTL-AMUSR	Single_Cell_Data	YEASTRACT_2019	Tchourine_2018	YPD	1	11037	56	0.116401
Figure_5e			Log2		MTL-AMUSR	Single_Cell_Data	YEASTRACT_2019	Tchourine_2018	RAPA	1	11805	56	0.11955
Figure_5e			Log2		MTL-AMUSR	Single_Cell_Data	YEASTRACT_2019	Tchourine_2018	NLIMNH4	1	1111	56	0.127668
Figure_5e			Log2		MTL-AMUSR	Single_Cell_Data	YEASTRACT_2019	Tchourine_2018	DIAUXY	1	3332	56	0.131747
Figure_5e			Log2		MTL-AMUSR	Single_Cell_Data	YEASTRACT_2019	Tchourine_2018	NLIMGLN	1	1644	56	0.159087
Figure_5e			Log2		MTL-AMUSR	Single_Cell_Data	YEASTRACT_2019	Tchourine_2018	CSTARVE	1	3549	56	0.128053
Figure_5e			Log2		MTL-AMUSR	Single_Cell_Data	YEASTRACT_2019	Tchourine_2018	MMETOH	1	581	56	0.122822
Figure_5e			Log2		MTL-AMUSR	Single_Cell_Data	YEASTRACT_2019	Tchourine_2018	NLIMPRO	1	853	56	0.103828
Figure_5e			Log2		MTL-AMUSR	Single_Cell_Data	YEASTRACT_2019	Tchourine_2018	NLIMUREA	1	992	56	0.124972
Figure_5e			Log2		MTL-AMUSR	Single_Cell_Data	YEASTRACT_2019	Tchourine_2018	YPETOH	1	1427	56	0.115866
Figure_5e			Log2		MTL-AMUSR	Single_Cell_Data	YEASTRACT_2019	Tchourine_2018	MMD	1	1894	56	0.192906
Figure_5e			Log2		MTL-AMUSR	Single_Cell_Data	YEASTRACT_2019	Tchourine_2018	ALL	1	38225	56	0.238473
Figure_5e			Log2		MTL-AMUSR	Single_Cell_Data	YEASTRACT_2019	Tchourine_2018	YPETOH	1	1427	57	0.109326
Figure_5e			Log2		MTL-AMUSR	Single_Cell_Data	YEASTRACT_2019	Tchourine_2018	RAPA	1	11805	57	0.137799
Figure_5e			Log2		MTL-AMUSR	Single_Cell_Data	YEASTRACT_2019	Tchourine_2018	YPD	1	11037	57	0.118271
Figure_5e			Log2		MTL-AMUSR	Single_Cell_Data	YEASTRACT_2019	Tchourine_2018	DIAUXY	1	3332	57	0.130335
Figure_5e			Log2		MTL-AMUSR	Single_Cell_Data	YEASTRACT_2019	Tchourine_2018	NLIMUREA	1	992	57	0.120311
Figure_5e			Log2		MTL-AMUSR	Single_Cell_Data	YEASTRACT_2019	Tchourine_2018	CSTARVE	1	3549	57	0.133433
Figure_5e			Log2		MTL-AMUSR	Single_Cell_Data	YEASTRACT_2019	Tchourine_2018	MMD	1	1894	57	0.166117
Figure_5e			Log2		MTL-AMUSR	Single_Cell_Data	YEASTRACT_2019	Tchourine_2018	NLIMNH4	1	1111	57	0.116381
Figure_5e			Log2		MTL-AMUSR	Single_Cell_Data	YEASTRACT_2019	Tchourine_2018	MMETOH	1	581	57	0.118598
Figure_5e			Log2		MTL-AMUSR	Single_Cell_Data	YEASTRACT_2019	Tchourine_2018	NLIMPRO	1	853	57	0.098613
Figure_5e			Log2		MTL-AMUSR	Single_Cell_Data	YEASTRACT_2019	Tchourine_2018	NLIMGLN	1	1644	57	0.144832
Figure_5e			Log2		MTL-AMUSR	Single_Cell_Data	YEASTRACT_2019	Tchourine_2018	ALL	1	38225	57	0.24231
Figure_5e			Log2		MTL-AMUSR	Single_Cell_Data	YEASTRACT_2019	Tchourine_2018	NLIMNH4	1	1111	58	0.13074
Figure_5e			Log2		MTL-AMUSR	Single_Cell_Data	YEASTRACT_2019	Tchourine_2018	YPD	1	11037	58	0.145587
Figure_5e			Log2		MTL-AMUSR	Single_Cell_Data	YEASTRACT_2019	Tchourine_2018	RAPA	1	11805	58	0.154866
Figure_5e			Log2		MTL-AMUSR	Single_Cell_Data	YEASTRACT_2019	Tchourine_2018	DIAUXY	1	3332	58	0.15528
Figure_5e			Log2		MTL-AMUSR	Single_Cell_Data	YEASTRACT_2019	Tchourine_2018	CSTARVE	1	3549	58	0.133009
Figure_5e			Log2		MTL-AMUSR	Single_Cell_Data	YEASTRACT_2019	Tchourine_2018	MMD	1	1894	58	0.186907
Figure_5e			Log2		MTL-AMUSR	Single_Cell_Data	YEASTRACT_2019	Tchourine_2018	YPETOH	1	1427	58	0.14791
Figure_5e			Log2		MTL-AMUSR	Single_Cell_Data	YEASTRACT_2019	Tchourine_2018	NLIMPRO	1	853	58	0.139371
Figure_5e			Log2		MTL-AMUSR	Single_Cell_Data	YEASTRACT_2019	Tchourine_2018	NLIMGLN	1	1644	58	0.169369
Figure_5e			Log2		MTL-AMUSR	Single_Cell_Data	YEASTRACT_2019	Tchourine_2018	NLIMUREA	1	992	58	0.137916
Figure_5e			Log2		MTL-AMUSR	Single_Cell_Data	YEASTRACT_2019	Tchourine_2018	MMETOH	1	581	58	0.139937
Figure_5e			Log2		MTL-AMUSR	Single_Cell_Data	YEASTRACT_2019	Tchourine_2018	ALL	1	38225	58	0.241881
Figure_5e			Log2		MTL-AMUSR	Single_Cell_Data	YEASTRACT_2019	Tchourine_2018	DIAUXY	1	3332	59	0.146392
Figure_5e			Log2		MTL-AMUSR	Single_Cell_Data	YEASTRACT_2019	Tchourine_2018	YPD	1	11037	59	0.127098
Figure_5e			Log2		MTL-AMUSR	Single_Cell_Data	YEASTRACT_2019	Tchourine_2018	YPETOH	1	1427	59	0.124677
Figure_5e			Log2		MTL-AMUSR	Single_Cell_Data	YEASTRACT_2019	Tchourine_2018	MMETOH	1	581	59	0.122373
Figure_5e			Log2		MTL-AMUSR	Single_Cell_Data	YEASTRACT_2019	Tchourine_2018	NLIMGLN	1	1644	59	0.166429
Figure_5e			Log2		MTL-AMUSR	Single_Cell_Data	YEASTRACT_2019	Tchourine_2018	RAPA	1	11805	59	0.124941
Figure_5e			Log2		MTL-AMUSR	Single_Cell_Data	YEASTRACT_2019	Tchourine_2018	CSTARVE	1	3549	59	0.112445
Figure_5e			Log2		MTL-AMUSR	Single_Cell_Data	YEASTRACT_2019	Tchourine_2018	NLIMUREA	1	992	59	0.120437
Figure_5e			Log2		MTL-AMUSR	Single_Cell_Data	YEASTRACT_2019	Tchourine_2018	NLIMNH4	1	1111	59	0.131715
Figure_5e			Log2		MTL-AMUSR	Single_Cell_Data	YEASTRACT_2019	Tchourine_2018	MMD	1	1894	59	0.171645
Figure_5e			Log2		MTL-AMUSR	Single_Cell_Data	YEASTRACT_2019	Tchourine_2018	NLIMPRO	1	853	59	0.0961746
Figure_5e			Log2		MTL-AMUSR	Single_Cell_Data	YEASTRACT_2019	Tchourine_2018	ALL	1	38225	59	0.229896
Figure_5e			Log2		MTL-AMUSR	Single_Cell_Data	YEASTRACT_2019	Tchourine_2018	YPETOH	1	1427	60	0.140314
Figure_5e			Log2		MTL-AMUSR	Single_Cell_Data	YEASTRACT_2019	Tchourine_2018	RAPA	1	11805	60	0.141486
Figure_5e			Log2		MTL-AMUSR	Single_Cell_Data	YEASTRACT_2019	Tchourine_2018	CSTARVE	1	3549	60	0.124259
Figure_5e			Log2		MTL-AMUSR	Single_Cell_Data	YEASTRACT_2019	Tchourine_2018	MMETOH	1	581	60	0.131767
Figure_5e			Log2		MTL-AMUSR	Single_Cell_Data	YEASTRACT_2019	Tchourine_2018	DIAUXY	1	3332	60	0.130745
Figure_5e			Log2		MTL-AMUSR	Single_Cell_Data	YEASTRACT_2019	Tchourine_2018	YPD	1	11037	60	0.133919
Figure_5e			Log2		MTL-AMUSR	Single_Cell_Data	YEASTRACT_2019	Tchourine_2018	NLIMGLN	1	1644	60	0.166477
Figure_5e			Log2		MTL-AMUSR	Single_Cell_Data	YEASTRACT_2019	Tchourine_2018	NLIMUREA	1	992	60	0.134117
Figure_5e			Log2		MTL-AMUSR	Single_Cell_Data	YEASTRACT_2019	Tchourine_2018	MMD	1	1894	60	0.180495
Figure_5e			Log2		MTL-AMUSR	Single_Cell_Data	YEASTRACT_2019	Tchourine_2018	NLIMNH4	1	1111	60	0.1216
Figure_5e			Log2		MTL-AMUSR	Single_Cell_Data	YEASTRACT_2019	Tchourine_2018	NLIMPRO	1	853	60	0.115574
Figure_5e			Log2		MTL-AMUSR	Single_Cell_Data	YEASTRACT_2019	Tchourine_2018	ALL	1	38225	60	0.251368
Figure_5e			Log2		MTL-AMUSR	Single_Cell_Data	YEASTRACT_2019	Tchourine_2018	NLIMGLN	1	1644	61	0.141573
Figure_5e			Log2		MTL-AMUSR	Single_Cell_Data	YEASTRACT_2019	Tchourine_2018	YPD	1	11037	61	0.139301
Figure_5e			Log2		MTL-AMUSR	Single_Cell_Data	YEASTRACT_2019	Tchourine_2018	MMD	1	1894	61	0.17131
Figure_5e			Log2		MTL-AMUSR	Single_Cell_Data	YEASTRACT_2019	Tchourine_2018	RAPA	1	11805	61	0.128107
Figure_5e			Log2		MTL-AMUSR	Single_Cell_Data	YEASTRACT_2019	Tchourine_2018	NLIMUREA	1	992	61	0.117444
Figure_5e			Log2		MTL-AMUSR	Single_Cell_Data	YEASTRACT_2019	Tchourine_2018	YPETOH	1	1427	61	0.123633
Figure_5e			Log2		MTL-AMUSR	Single_Cell_Data	YEASTRACT_2019	Tchourine_2018	CSTARVE	1	3549	61	0.104794
Figure_5e			Log2		MTL-AMUSR	Single_Cell_Data	YEASTRACT_2019	Tchourine_2018	DIAUXY	1	3332	61	0.11624
Figure_5e			Log2		MTL-AMUSR	Single_Cell_Data	YEASTRACT_2019	Tchourine_2018	NLIMPRO	1	853	61	0.0908479
Figure_5e			Log2		MTL-AMUSR	Single_Cell_Data	YEASTRACT_2019	Tchourine_2018	NLIMNH4	1	1111	61	0.128967
Figure_5e			Log2		MTL-AMUSR	Single_Cell_Data	YEASTRACT_2019	Tchourine_2018	MMETOH	1	581	61	0.111844
Figure_5e			Log2		MTL-AMUSR	Single_Cell_Data	YEASTRACT_2019	Tchourine_2018	ALL	1	38225	61	0.233237

## Sheet: Supplemental Table 6 - Analysis
Gene	Group	Source
YDR417C	RP	Gasch_2017
YDR454C	RP	Gasch_2017
YEL026W	RP	Gasch_2017
YER025W	RP	Gasch_2017
YGL102C	RP	Gasch_2017
YHR128W	RP	Gasch_2017
YJL138C	RP	Gasch_2017
YKL056C	RP	Gasch_2017
YKL081W	RP	Gasch_2017
YKR059W	RP	Gasch_2017
YLL044W	RP	Gasch_2017
YLR062C	RP	Gasch_2017
YLR339C	RP	Gasch_2017
YML022W	RP	Gasch_2017
YMR116C	RP	Gasch_2017
YMR146C	RP	Gasch_2017
YNL119W	RP	Gasch_2017
YNL209W	RP	Gasch_2017
YPL142C	RP	Gasch_2017
YPR044C	RP	Gasch_2017
YBL027W	RP	Gasch_2017
YBL072C	RP	Gasch_2017
YBL087C	RP	Gasch_2017
YBL092W	RP	Gasch_2017
YBR031W	RP	Gasch_2017
YBR048W	RP	Gasch_2017
YBR084C-A	RP	Gasch_2017
YBR181C	RP	Gasch_2017
YBR189W	RP	Gasch_2017
YBR191W	RP	Gasch_2017
YCR031C	RP	Gasch_2017
YDL061C	RP	Gasch_2017
YDL075W	RP	Gasch_2017
YDL081C	RP	Gasch_2017
YDL082W	RP	Gasch_2017
YDL083C	RP	Gasch_2017
YDL136W	RP	Gasch_2017
YDL191W	RP	Gasch_2017
YDR012W	RP	Gasch_2017
YDR025W	RP	Gasch_2017
YDR064W	RP	Gasch_2017
YDR382W	RP	Gasch_2017
YDR418W	RP	Gasch_2017
YDR447C	RP	Gasch_2017
YDR450W	RP	Gasch_2017
YDR471W	RP	Gasch_2017
YDR500C	RP	Gasch_2017
YEL054C	RP	Gasch_2017
YER056C-A	RP	Gasch_2017
YER074W	RP	Gasch_2017
YER102W	RP	Gasch_2017
YER117W	RP	Gasch_2017
YER131W	RP	Gasch_2017
YFR031C-A	RP	Gasch_2017
YGL030W	RP	Gasch_2017
YGL031C	RP	Gasch_2017
YGL076C	RP	Gasch_2017
YGL103W	RP	Gasch_2017
YGL123W	RP	Gasch_2017
YGL135W	RP	Gasch_2017
YGL147C	RP	Gasch_2017
YGL189C	RP	Gasch_2017
YGR027C	RP	Gasch_2017
YGR034W	RP	Gasch_2017
YGR085C	RP	Gasch_2017
YGR118W	RP	Gasch_2017
YGR148C	RP	Gasch_2017
YGR214W	RP	Gasch_2017
YHL001W	RP	Gasch_2017
YHL033C	RP	Gasch_2017
YHR010W	RP	Gasch_2017
YHR021C	RP	Gasch_2017
YHR141C	RP	Gasch_2017
YHR203C	RP	Gasch_2017
YIL018W	RP	Gasch_2017
YIL052C	RP	Gasch_2017
YIL133C	RP	Gasch_2017
YIL148W	RP	Gasch_2017
YJL136C	RP	Gasch_2017
YJL177W	RP	Gasch_2017
YJL189W	RP	Gasch_2017
YJL190C	RP	Gasch_2017
YJL191W	RP	Gasch_2017
YJR094W-A	RP	Gasch_2017
YJR123W	RP	Gasch_2017
YJR145C	RP	Gasch_2017
YKL006W	RP	Gasch_2017
YKL156W	RP	Gasch_2017
YKL180W	RP	Gasch_2017
YKR057W	RP	Gasch_2017
YKR094C	RP	Gasch_2017
YLL045C	RP	Gasch_2017
YLR009W	RP	Gasch_2017
YLR029C	RP	Gasch_2017
YLR048W	RP	Gasch_2017
YLR061W	RP	Gasch_2017
YLR075W	RP	Gasch_2017
YLR167W	RP	Gasch_2017
YLR185W	RP	Gasch_2017
YLR264W	RP	Gasch_2017
YLR325C	RP	Gasch_2017
YLR333C	RP	Gasch_2017
YLR340W	RP	Gasch_2017
YLR344W	RP	Gasch_2017
YLR367W	RP	Gasch_2017
YLR388W	RP	Gasch_2017
YLR441C	RP	Gasch_2017
YLR448W	RP	Gasch_2017
YML024W	RP	Gasch_2017
YML026C	RP	Gasch_2017
YML063W	RP	Gasch_2017
YML073C	RP	Gasch_2017
YMR121C	RP	Gasch_2017
YMR142C	RP	Gasch_2017
YMR143W	RP	Gasch_2017
YMR194W	RP	Gasch_2017
YMR230W	RP	Gasch_2017
YMR242C	RP	Gasch_2017
YNL002C	RP	Gasch_2017
YNL067W	RP	Gasch_2017
YNL069C	RP	Gasch_2017
YNL096C	RP	Gasch_2017
YNL162W	RP	Gasch_2017
YNL178W	RP	Gasch_2017
YNL301C	RP	Gasch_2017
YNL302C	RP	Gasch_2017
YOL039W	RP	Gasch_2017
YOL040C	RP	Gasch_2017
YOL120C	RP	Gasch_2017
YOL121C	RP	Gasch_2017
YOL127W	RP	Gasch_2017
YOR063W	RP	Gasch_2017
YOR096W	RP	Gasch_2017
YOR167C	RP	Gasch_2017
YOR182C	RP	Gasch_2017
YOR234C	RP	Gasch_2017
YOR293W	RP	Gasch_2017
YOR312C	RP	Gasch_2017
YOR369C	RP	Gasch_2017
YPL079W	RP	Gasch_2017
YPL081W	RP	Gasch_2017
YPL090C	RP	Gasch_2017
YPL143W	RP	Gasch_2017
YPL198W	RP	Gasch_2017
YPL220W	RP	Gasch_2017
YPR043W	RP	Gasch_2017
YPR102C	RP	Gasch_2017
YPR132W	RP	Gasch_2017
YDL130W	RP	Gasch_2017
YDL133C-A	RP	Gasch_2017
YDL184C	RP	Gasch_2017
YFL034C-A	RP	Gasch_2017
YFR032C-A	RP	Gasch_2017
YHL015W	RP	Gasch_2017
YIL069C	RP	Gasch_2017
YLR287C-A	RP	Gasch_2017
YLR406C	RP	Gasch_2017
YPL131W	RP	Gasch_2017
YPL249C-A	RP	Gasch_2017
YAL061W	iESR	Gasch_2017
YBL049W	iESR	Gasch_2017
YBL064C	iESR	Gasch_2017
YBL075C	iESR	Gasch_2017
YBL078C	iESR	Gasch_2017
YBR006W	iESR	Gasch_2017
YBR026C	iESR	Gasch_2017
YBR052C	iESR	Gasch_2017
YBR053C	iESR	Gasch_2017
YBR056W	iESR	Gasch_2017
YBR072W	iESR	Gasch_2017
YBR126C	iESR	Gasch_2017
YBR139W	iESR	Gasch_2017
YBR149W	iESR	Gasch_2017
YBR169C	iESR	Gasch_2017
YBR183W	iESR	Gasch_2017
YBR204C	iESR	Gasch_2017
YBR230C	iESR	Gasch_2017
YBR269C	iESR	Gasch_2017
YBR285W	iESR	Gasch_2017
YBR287W	iESR	Gasch_2017
YCL035C	iESR	Gasch_2017
YCL040W	iESR	Gasch_2017
YCL042W	iESR	Gasch_2017
YCR004C	iESR	Gasch_2017
YCR061W	iESR	Gasch_2017
YCR091W	iESR	Gasch_2017
YDL021W	iESR	Gasch_2017
YDL022W	iESR	Gasch_2017
YDL023C	iESR	Gasch_2017
YDL027C	iESR	Gasch_2017
YDL110C	iESR	Gasch_2017
YDL124W	iESR	Gasch_2017
YDL199C	iESR	Gasch_2017
YDL204W	iESR	Gasch_2017
YDL222C	iESR	Gasch_2017
YDR001C	iESR	Gasch_2017
YDR003W	iESR	Gasch_2017
YDR032C	iESR	Gasch_2017
YDR059C	iESR	Gasch_2017
YDR070C	iESR	Gasch_2017
YDR074W	iESR	Gasch_2017
YDR085C	iESR	Gasch_2017
YDR096W	iESR	Gasch_2017
YDR169C	iESR	Gasch_2017
YDR171W	iESR	Gasch_2017
YDR204W	iESR	Gasch_2017
YDR254W	iESR	Gasch_2017
YDR255C	iESR	Gasch_2017
YDR258C	iESR	Gasch_2017
YDR272W	iESR	Gasch_2017
YDR286C	iESR	Gasch_2017
YDR287W	iESR	Gasch_2017
YDR350C	iESR	Gasch_2017
YDR358W	iESR	Gasch_2017
YDR368W	iESR	Gasch_2017
YDR380W	iESR	Gasch_2017
YDR453C	iESR	Gasch_2017
YDR512C	iESR	Gasch_2017
YDR513W	iESR	Gasch_2017
YDR516C	iESR	Gasch_2017
YDR533C	iESR	Gasch_2017
YEL005C	iESR	Gasch_2017
YEL011W	iESR	Gasch_2017
YEL012W	iESR	Gasch_2017
YEL039C	iESR	Gasch_2017
YEL060C	iESR	Gasch_2017
YER035W	iESR	Gasch_2017
YER037W	iESR	Gasch_2017
YER038C	iESR	Gasch_2017
YER053C	iESR	Gasch_2017
YER079W	iESR	Gasch_2017
YER103W	iESR	Gasch_2017
YER119C	iESR	Gasch_2017
YER141W	iESR	Gasch_2017
YER142C	iESR	Gasch_2017
YER150W	iESR	Gasch_2017
YER158C	iESR	Gasch_2017
YFL014W	iESR	Gasch_2017
YFL044C	iESR	Gasch_2017
YFR053C	iESR	Gasch_2017
YGL006W	iESR	Gasch_2017
YGL010W	iESR	Gasch_2017
YGL037C	iESR	Gasch_2017
YGL059W	iESR	Gasch_2017
YGL087C	iESR	Gasch_2017
YGL096W	iESR	Gasch_2017
YGL104C	iESR	Gasch_2017
YGL121C	iESR	Gasch_2017
YGL156W	iESR	Gasch_2017
YGL180W	iESR	Gasch_2017
YGL208W	iESR	Gasch_2017
YGL248W	iESR	Gasch_2017
YGR008C	iESR	Gasch_2017
YGR019W	iESR	Gasch_2017
YGR023W	iESR	Gasch_2017
YGR043C	iESR	Gasch_2017
YGR088W	iESR	Gasch_2017
YGR127W	iESR	Gasch_2017
YGR149W	iESR	Gasch_2017
YGR161C	iESR	Gasch_2017
YGR194C	iESR	Gasch_2017
YGR201C	iESR	Gasch_2017
YGR209C	iESR	Gasch_2017
YGR237C	iESR	Gasch_2017
YGR248W	iESR	Gasch_2017
YGR250C	iESR	Gasch_2017
YGR256W	iESR	Gasch_2017
YHL021C	iESR	Gasch_2017
YHR087W	iESR	Gasch_2017
YHR096C	iESR	Gasch_2017
YHR097C	iESR	Gasch_2017
YHR104W	iESR	Gasch_2017
YHR112C	iESR	Gasch_2017
YHR137W	iESR	Gasch_2017
YHR138C	iESR	Gasch_2017
YHR171W	iESR	Gasch_2017
YIL045W	iESR	Gasch_2017
YIL097W	iESR	Gasch_2017
YIL099W	iESR	Gasch_2017
YIL101C	iESR	Gasch_2017
YIL107C	iESR	Gasch_2017
YIL113W	iESR	Gasch_2017
YIL120W	iESR	Gasch_2017
YIL124W	iESR	Gasch_2017
YIL136W	iESR	Gasch_2017
YIR037W	iESR	Gasch_2017
YIR038C	iESR	Gasch_2017
YIR039C	iESR	Gasch_2017
YJL015C	iESR	Gasch_2017
YJL048C	iESR	Gasch_2017
YJL057C	iESR	Gasch_2017
YJL066C	iESR	Gasch_2017
YJL068C	iESR	Gasch_2017
YJL103C	iESR	Gasch_2017
YJL132W	iESR	Gasch_2017
YJL141C	iESR	Gasch_2017
YJL142C	iESR	Gasch_2017
YJL144W	iESR	Gasch_2017
YJL155C	iESR	Gasch_2017
YJL161W	iESR	Gasch_2017
YJL163C	iESR	Gasch_2017
YJL164C	iESR	Gasch_2017
YJR008W	iESR	Gasch_2017
YJR025C	iESR	Gasch_2017
YJR059W	iESR	Gasch_2017
YJR066W	iESR	Gasch_2017
YJR096W	iESR	Gasch_2017
YJR104C	iESR	Gasch_2017
YKL026C	iESR	Gasch_2017
YKL035W	iESR	Gasch_2017
YKL065C	iESR	Gasch_2017
YKL067W	iESR	Gasch_2017
YKL091C	iESR	Gasch_2017
YKL093W	iESR	Gasch_2017
YKL100C	iESR	Gasch_2017
YKL103C	iESR	Gasch_2017
YKL121W	iESR	Gasch_2017
YKL124W	iESR	Gasch_2017
YKL133C	iESR	Gasch_2017
YKL142W	iESR	Gasch_2017
YKL150W	iESR	Gasch_2017
YKL151C	iESR	Gasch_2017
YKL188C	iESR	Gasch_2017
YKL193C	iESR	Gasch_2017
YKR009C	iESR	Gasch_2017
YKR011C	iESR	Gasch_2017
YKR049C	iESR	Gasch_2017
YKR058W	iESR	Gasch_2017
YKR066C	iESR	Gasch_2017
YKR067W	iESR	Gasch_2017
YKR076W	iESR	Gasch_2017
YLL019C	iESR	Gasch_2017
YLL020C	iESR	Gasch_2017
YLL026W	iESR	Gasch_2017
YLL039C	iESR	Gasch_2017
YLR001C	iESR	Gasch_2017
YLR080W	iESR	Gasch_2017
YLR142W	iESR	Gasch_2017
YLR149C	iESR	Gasch_2017
YLR152C	iESR	Gasch_2017
YLR178C	iESR	Gasch_2017
YLR250W	iESR	Gasch_2017
YLR251W	iESR	Gasch_2017
YLR252W	iESR	Gasch_2017
YLR258W	iESR	Gasch_2017
YLR267W	iESR	Gasch_2017
YLR270W	iESR	Gasch_2017
YLR290C	iESR	Gasch_2017
YLR299W	iESR	Gasch_2017
YLR312C	iESR	Gasch_2017
YLR327C	iESR	Gasch_2017
YLR345W	iESR	Gasch_2017
YLR356W	iESR	Gasch_2017
YLR370C	iESR	Gasch_2017
YML004C	iESR	Gasch_2017
YML042W	iESR	Gasch_2017
YML100W	iESR	Gasch_2017
YML110C	iESR	Gasch_2017
YML128C	iESR	Gasch_2017
YML131W	iESR	Gasch_2017
YMR041C	iESR	Gasch_2017
YMR053C	iESR	Gasch_2017
YMR081C	iESR	Gasch_2017
YMR090W	iESR	Gasch_2017
YMR105C	iESR	Gasch_2017
YMR110C	iESR	Gasch_2017
YMR136W	iESR	Gasch_2017
YMR139W	iESR	Gasch_2017
YMR155W	iESR	Gasch_2017
YMR169C	iESR	Gasch_2017
YMR170C	iESR	Gasch_2017
YMR173W	iESR	Gasch_2017
YMR173W-A	iESR	Gasch_2017
YMR174C	iESR	Gasch_2017
YMR181C	iESR	Gasch_2017
YMR196W	iESR	Gasch_2017
YMR197C	iESR	Gasch_2017
YMR250W	iESR	Gasch_2017
YMR251W	iESR	Gasch_2017
YMR251W-A	iESR	Gasch_2017
YMR253C	iESR	Gasch_2017
YMR271C	iESR	Gasch_2017
YMR291W	iESR	Gasch_2017
YMR297W	iESR	Gasch_2017
YMR302C	iESR	Gasch_2017
YMR304W	iESR	Gasch_2017
YMR315W	iESR	Gasch_2017
YNL009W	iESR	Gasch_2017
YNL015W	iESR	Gasch_2017
YNL055C	iESR	Gasch_2017
YNL115C	iESR	Gasch_2017
YNL134C	iESR	Gasch_2017
YNL160W	iESR	Gasch_2017
YNL183C	iESR	Gasch_2017
YNL194C	iESR	Gasch_2017
YNL195C	iESR	Gasch_2017
YNL200C	iESR	Gasch_2017
YNL208W	iESR	Gasch_2017
YNL241C	iESR	Gasch_2017
YNL274C	iESR	Gasch_2017
YNL305C	iESR	Gasch_2017
YNR001C	iESR	Gasch_2017
YNR002C	iESR	Gasch_2017
YOL048C	iESR	Gasch_2017
YOL082W	iESR	Gasch_2017
YOL083W	iESR	Gasch_2017
YOL084W	iESR	Gasch_2017
YOL150C	iESR	Gasch_2017
YOL151W	iESR	Gasch_2017
YOL153C	iESR	Gasch_2017
YOR052C	iESR	Gasch_2017
YOR152C	iESR	Gasch_2017
YOR161C	iESR	Gasch_2017
YOR173W	iESR	Gasch_2017
YOR185C	iESR	Gasch_2017
YOR220W	iESR	Gasch_2017
YOR285W	iESR	Gasch_2017
YOR289W	iESR	Gasch_2017
YOR317W	iESR	Gasch_2017
YOR374W	iESR	Gasch_2017
YPL004C	iESR	Gasch_2017
YPL054W	iESR	Gasch_2017
YPL087W	iESR	Gasch_2017
YPL152W	iESR	Gasch_2017
YPL154C	iESR	Gasch_2017
YPL165C	iESR	Gasch_2017
YPL166W	iESR	Gasch_2017
YPL186C	iESR	Gasch_2017
YPL196W	iESR	Gasch_2017
YPL203W	iESR	Gasch_2017
YPL230W	iESR	Gasch_2017
YPR026W	iESR	Gasch_2017
YPR067W	iESR	Gasch_2017
YPR098C	iESR	Gasch_2017
YPR149W	iESR	Gasch_2017
YPR150W	iESR	Gasch_2017
YPR151C	iESR	Gasch_2017
YPR184W	iESR	Gasch_2017
YAL003W	RiBi	Gasch_2017
YAL025C	RiBi	Gasch_2017
YAL035W	RiBi	Gasch_2017
YAL036C	RiBi	Gasch_2017
YAL038W	RiBi	Gasch_2017
YAL059W	RiBi	Gasch_2017
YBL024W	RiBi	Gasch_2017
YBL028C	RiBi	Gasch_2017
YBL035C	RiBi	Gasch_2017
YBL039C	RiBi	Gasch_2017
YBL054W	RiBi	Gasch_2017
YBL068W	RiBi	Gasch_2017
YBL077W	RiBi	Gasch_2017
YBR025C	RiBi	Gasch_2017
YBR030W	RiBi	Gasch_2017
YBR034C	RiBi	Gasch_2017
YBR061C	RiBi	Gasch_2017
YBR079C	RiBi	Gasch_2017
YBR084W	RiBi	Gasch_2017
YBR106W	RiBi	Gasch_2017
YBR118W	RiBi	Gasch_2017
YBR121C	RiBi	Gasch_2017
YBR142W	RiBi	Gasch_2017
YBR143C	RiBi	Gasch_2017
YBR154C	RiBi	Gasch_2017
YBR155W	RiBi	Gasch_2017
YBR238C	RiBi	Gasch_2017
YBR246W	RiBi	Gasch_2017
YBR247C	RiBi	Gasch_2017
YBR249C	RiBi	Gasch_2017
YBR252W	RiBi	Gasch_2017
YBR267W	RiBi	Gasch_2017
YBR283C	RiBi	Gasch_2017
YCL031C	RiBi	Gasch_2017
YCL037C	RiBi	Gasch_2017
YCL045C	RiBi	Gasch_2017
YCL054W	RiBi	Gasch_2017
YCL059C	RiBi	Gasch_2017
YCR016W	RiBi	Gasch_2017
YCR034W	RiBi	Gasch_2017
YCR035C	RiBi	Gasch_2017
YCR053W	RiBi	Gasch_2017
YCR057C	RiBi	Gasch_2017
YCR072C	RiBi	Gasch_2017
YDL031W	RiBi	Gasch_2017
YDL051W	RiBi	Gasch_2017
YDL060W	RiBi	Gasch_2017
YDL063C	RiBi	Gasch_2017
YDL084W	RiBi	Gasch_2017
YDL111C	RiBi	Gasch_2017
YDL143W	RiBi	Gasch_2017
YDL150W	RiBi	Gasch_2017
YDL153C	RiBi	Gasch_2017
YDL167C	RiBi	Gasch_2017
YDL201W	RiBi	Gasch_2017
YDR023W	RiBi	Gasch_2017
YDR037W	RiBi	Gasch_2017
YDR083W	RiBi	Gasch_2017
YDR087C	RiBi	Gasch_2017
YDR091C	RiBi	Gasch_2017
YDR097C	RiBi	Gasch_2017
YDR101C	RiBi	Gasch_2017
YDR120C	RiBi	Gasch_2017
YDR152W	RiBi	Gasch_2017
YDR161W	RiBi	Gasch_2017
YDR165W	RiBi	Gasch_2017
YDR172W	RiBi	Gasch_2017
YDR184C	RiBi	Gasch_2017
YDR190C	RiBi	Gasch_2017
YDR211W	RiBi	Gasch_2017
YDR233C	RiBi	Gasch_2017
YDR280W	RiBi	Gasch_2017
YDR300C	RiBi	Gasch_2017
YDR312W	RiBi	Gasch_2017
YDR321W	RiBi	Gasch_2017
YDR324C	RiBi	Gasch_2017
YDR339C	RiBi	Gasch_2017
YDR341C	RiBi	Gasch_2017
YDR346C	RiBi	Gasch_2017
YDR361C	RiBi	Gasch_2017
YDR365C	RiBi	Gasch_2017
YDR385W	RiBi	Gasch_2017
YDR398W	RiBi	Gasch_2017
YDR412W	RiBi	Gasch_2017
YDR413C	RiBi	Gasch_2017
YDR429C	RiBi	Gasch_2017
YDR440W	RiBi	Gasch_2017
YDR449C	RiBi	Gasch_2017
YDR465C	RiBi	Gasch_2017
YDR496C	RiBi	Gasch_2017
YEL040W	RiBi	Gasch_2017
YEL042W	RiBi	Gasch_2017
YER006W	RiBi	Gasch_2017
YER009W	RiBi	Gasch_2017
YER036C	RiBi	Gasch_2017
YER043C	RiBi	Gasch_2017
YER049W	RiBi	Gasch_2017
YER070W	RiBi	Gasch_2017
YER082C	RiBi	Gasch_2017
YER110C	RiBi	Gasch_2017
YER118C	RiBi	Gasch_2017
YER126C	RiBi	Gasch_2017
YER127W	RiBi	Gasch_2017
YER165W	RiBi	Gasch_2017
YFL002C	RiBi	Gasch_2017
YFL022C	RiBi	Gasch_2017
YFL023W	RiBi	Gasch_2017
YFL045C	RiBi	Gasch_2017
YFR001W	RiBi	Gasch_2017
YGL008C	RiBi	Gasch_2017
YGL029W	RiBi	Gasch_2017
YGL070C	RiBi	Gasch_2017
YGL078C	RiBi	Gasch_2017
YGL097W	RiBi	Gasch_2017
YGL099W	RiBi	Gasch_2017
YGL111W	RiBi	Gasch_2017
YGL120C	RiBi	Gasch_2017
YGL148W	RiBi	Gasch_2017
YGL169W	RiBi	Gasch_2017
YGL171W	RiBi	Gasch_2017
YGL213C	RiBi	Gasch_2017
YGL225W	RiBi	Gasch_2017
YGR054W	RiBi	Gasch_2017
YGR078C	RiBi	Gasch_2017
YGR081C	RiBi	Gasch_2017
YGR083C	RiBi	Gasch_2017
YGR094W	RiBi	Gasch_2017
YGR103W	RiBi	Gasch_2017
YGR123C	RiBi	Gasch_2017
YGR124W	RiBi	Gasch_2017
YGR128C	RiBi	Gasch_2017
YGR145W	RiBi	Gasch_2017
YGR152C	RiBi	Gasch_2017
YGR158C	RiBi	Gasch_2017
YGR160W	RiBi	Gasch_2017
YGR162W	RiBi	Gasch_2017
YGR173W	RiBi	Gasch_2017
YGR185C	RiBi	Gasch_2017
YGR187C	RiBi	Gasch_2017
YGR195W	RiBi	Gasch_2017
YGR200C	RiBi	Gasch_2017
YGR228W	RiBi	Gasch_2017
YGR229C	RiBi	Gasch_2017
YGR245C	RiBi	Gasch_2017
YGR251W	RiBi	Gasch_2017
YGR264C	RiBi	Gasch_2017
YGR265W	RiBi	Gasch_2017
YGR280C	RiBi	Gasch_2017
YGR283C	RiBi	Gasch_2017
YGR285C	RiBi	Gasch_2017
YHL011C	RiBi	Gasch_2017
YHL013C	RiBi	Gasch_2017
YHL039W	RiBi	Gasch_2017
YHR013C	RiBi	Gasch_2017
YHR019C	RiBi	Gasch_2017
YHR020W	RiBi	Gasch_2017
YHR025W	RiBi	Gasch_2017
YHR026W	RiBi	Gasch_2017
YHR042W	RiBi	Gasch_2017
YHR052W	RiBi	Gasch_2017
YHR064C	RiBi	Gasch_2017
YHR065C	RiBi	Gasch_2017
YHR066W	RiBi	Gasch_2017
YHR068W	RiBi	Gasch_2017
YHR088W	RiBi	Gasch_2017
YHR089C	RiBi	Gasch_2017
YHR133C	RiBi	Gasch_2017
YHR143W-A	RiBi	Gasch_2017
YHR144C	RiBi	Gasch_2017
YHR148W	RiBi	Gasch_2017
YHR169W	RiBi	Gasch_2017
YHR170W	RiBi	Gasch_2017
YHR193C	RiBi	Gasch_2017
YHR196W	RiBi	Gasch_2017
YHR197W	RiBi	Gasch_2017
YHR216W	RiBi	Gasch_2017
YIL019W	RiBi	Gasch_2017
YIL020C	RiBi	Gasch_2017
YIL021W	RiBi	Gasch_2017
YIL078W	RiBi	Gasch_2017
YIL079C	RiBi	Gasch_2017
YIL096C	RiBi	Gasch_2017
YIL104C	RiBi	Gasch_2017
YIL110W	RiBi	Gasch_2017
YIL127C	RiBi	Gasch_2017
YIR012W	RiBi	Gasch_2017
YIR026C	RiBi	Gasch_2017
YJL002C	RiBi	Gasch_2017
YJL014W	RiBi	Gasch_2017
YJL033W	RiBi	Gasch_2017
YJL050W	RiBi	Gasch_2017
YJL069C	RiBi	Gasch_2017
YJL080C	RiBi	Gasch_2017
YJL109C	RiBi	Gasch_2017
YJL122W	RiBi	Gasch_2017
YJL125C	RiBi	Gasch_2017
YJL148W	RiBi	Gasch_2017
YJL183W	RiBi	Gasch_2017
YJL188C	RiBi	Gasch_2017
YJL198W	RiBi	Gasch_2017
YJL208C	RiBi	Gasch_2017
YJR002W	RiBi	Gasch_2017
YJR003C	RiBi	Gasch_2017
YJR007W	RiBi	Gasch_2017
YJR014W	RiBi	Gasch_2017
YJR041C	RiBi	Gasch_2017
YJR043C	RiBi	Gasch_2017
YJR063W	RiBi	Gasch_2017
YJR064W	RiBi	Gasch_2017
YJR070C	RiBi	Gasch_2017
YJR071W	RiBi	Gasch_2017
YJR124C	RiBi	Gasch_2017
YJR143C	RiBi	Gasch_2017
YKL009W	RiBi	Gasch_2017
YKL021C	RiBi	Gasch_2017
YKL078W	RiBi	Gasch_2017
YKL080W	RiBi	Gasch_2017
YKL082C	RiBi	Gasch_2017
YKL099C	RiBi	Gasch_2017
YKL110C	RiBi	Gasch_2017
YKL122C	RiBi	Gasch_2017
YKL143W	RiBi	Gasch_2017
YKL144C	RiBi	Gasch_2017
YKL154W	RiBi	Gasch_2017
YKL172W	RiBi	Gasch_2017
YKL181W	RiBi	Gasch_2017
YKL205W	RiBi	Gasch_2017
YKR024C	RiBi	Gasch_2017
YKR025W	RiBi	Gasch_2017
YKR026C	RiBi	Gasch_2017
YKR043C	RiBi	Gasch_2017
YKR056W	RiBi	Gasch_2017
YKR060W	RiBi	Gasch_2017
YKR079C	RiBi	Gasch_2017
YKR081C	RiBi	Gasch_2017
YKR092C	RiBi	Gasch_2017
YLL008W	RiBi	Gasch_2017
YLL011W	RiBi	Gasch_2017
YLL034C	RiBi	Gasch_2017
YLL035W	RiBi	Gasch_2017
YLL036C	RiBi	Gasch_2017
YLL038C	RiBi	Gasch_2017
YLR002C	RiBi	Gasch_2017
YLR003C	RiBi	Gasch_2017
YLR017W	RiBi	Gasch_2017
YLR044C	RiBi	Gasch_2017
YLR051C	RiBi	Gasch_2017
YLR060W	RiBi	Gasch_2017
YLR063W	RiBi	Gasch_2017
YLR065C	RiBi	Gasch_2017
YLR073C	RiBi	Gasch_2017
YLR074C	RiBi	Gasch_2017
YLR076C	RiBi	Gasch_2017
YLR083C	RiBi	Gasch_2017
YLR129W	RiBi	Gasch_2017
YLR134W	RiBi	Gasch_2017
YLR146C	RiBi	Gasch_2017
YLR150W	RiBi	Gasch_2017
YLR172C	RiBi	Gasch_2017
YLR175W	RiBi	Gasch_2017
YLR183C	RiBi	Gasch_2017
YLR186W	RiBi	Gasch_2017
YLR196W	RiBi	Gasch_2017
YLR197W	RiBi	Gasch_2017
YLR198C	RiBi	Gasch_2017
YLR221C	RiBi	Gasch_2017
YLR222C	RiBi	Gasch_2017
YLR243W	RiBi	Gasch_2017
YLR249W	RiBi	Gasch_2017
YLR276C	RiBi	Gasch_2017
YLR291C	RiBi	Gasch_2017
YLR293C	RiBi	Gasch_2017
YLR336C	RiBi	Gasch_2017
YLR372W	RiBi	Gasch_2017
YLR397C	RiBi	Gasch_2017
YLR400W	RiBi	Gasch_2017
YLR401C	RiBi	Gasch_2017
YLR405W	RiBi	Gasch_2017
YLR409C	RiBi	Gasch_2017
YLR412W	RiBi	Gasch_2017
YLR413W	RiBi	Gasch_2017
YLR432W	RiBi	Gasch_2017
YLR433C	RiBi	Gasch_2017
YLR435W	RiBi	Gasch_2017
YLR447C	RiBi	Gasch_2017
YLR449W	RiBi	Gasch_2017
YML018C	RiBi	Gasch_2017
YML043C	RiBi	Gasch_2017
YML056C	RiBi	Gasch_2017
YML060W	RiBi	Gasch_2017
YML080W	RiBi	Gasch_2017
YML082W	RiBi	Gasch_2017
YML093W	RiBi	Gasch_2017
YML106W	RiBi	Gasch_2017
YMR014W	RiBi	Gasch_2017
YMR049C	RiBi	Gasch_2017
YMR079W	RiBi	Gasch_2017
YMR093W	RiBi	Gasch_2017
YMR128W	RiBi	Gasch_2017
YMR131C	RiBi	Gasch_2017
YMR212C	RiBi	Gasch_2017
YMR215W	RiBi	Gasch_2017
YMR217W	RiBi	Gasch_2017
YMR229C	RiBi	Gasch_2017
YMR234W	RiBi	Gasch_2017
YMR235C	RiBi	Gasch_2017
YMR239C	RiBi	Gasch_2017
YMR243C	RiBi	Gasch_2017
YMR269W	RiBi	Gasch_2017
YMR277W	RiBi	Gasch_2017
YMR290C	RiBi	Gasch_2017
YMR307W	RiBi	Gasch_2017
YMR308C	RiBi	Gasch_2017
YMR309C	RiBi	Gasch_2017
YMR310C	RiBi	Gasch_2017
YMR321C	RiBi	Gasch_2017
YNL001W	RiBi	Gasch_2017
YNL010W	RiBi	Gasch_2017
YNL022C	RiBi	Gasch_2017
YNL061W	RiBi	Gasch_2017
YNL062C	RiBi	Gasch_2017
YNL066W	RiBi	Gasch_2017
YNL075W	RiBi	Gasch_2017
YNL102W	RiBi	Gasch_2017
YNL110C	RiBi	Gasch_2017
YNL113W	RiBi	Gasch_2017
YNL114C	RiBi	Gasch_2017
YNL124W	RiBi	Gasch_2017
YNL132W	RiBi	Gasch_2017
YNL141W	RiBi	Gasch_2017
YNL151C	RiBi	Gasch_2017
YNL153C	RiBi	Gasch_2017
YNL163C	RiBi	Gasch_2017
YNL175C	RiBi	Gasch_2017
YNL182C	RiBi	Gasch_2017
YNL186W	RiBi	Gasch_2017
YNL227C	RiBi	Gasch_2017
YNL247W	RiBi	Gasch_2017
YNL248C	RiBi	Gasch_2017
YNL255C	RiBi	Gasch_2017
YNL256W	RiBi	Gasch_2017
YNL292W	RiBi	Gasch_2017
YNL299W	RiBi	Gasch_2017
YNL303W	RiBi	Gasch_2017
YNL308C	RiBi	Gasch_2017
YNL313C	RiBi	Gasch_2017
YNR003C	RiBi	Gasch_2017
YNR009W	RiBi	Gasch_2017
YNR024W	RiBi	Gasch_2017
YNR043W	RiBi	Gasch_2017
YNR053C	RiBi	Gasch_2017
YNR054C	RiBi	Gasch_2017
YOL022C	RiBi	Gasch_2017
YOL041C	RiBi	Gasch_2017
YOL077C	RiBi	Gasch_2017
YOL097C	RiBi	Gasch_2017
YOL124C	RiBi	Gasch_2017
YOR001W	RiBi	Gasch_2017
YOR004W	RiBi	Gasch_2017
YOR021C	RiBi	Gasch_2017
YOR095C	RiBi	Gasch_2017
YOR145C	RiBi	Gasch_2017
YOR168W	RiBi	Gasch_2017
YOR169C	RiBi	Gasch_2017
YOR188W	RiBi	Gasch_2017
YOR206W	RiBi	Gasch_2017
YOR209C	RiBi	Gasch_2017
YOR210W	RiBi	Gasch_2017
YOR217W	RiBi	Gasch_2017
YOR224C	RiBi	Gasch_2017
YOR233W	RiBi	Gasch_2017
YOR243C	RiBi	Gasch_2017
YOR252W	RiBi	Gasch_2017
YOR253W	RiBi	Gasch_2017
YOR260W	RiBi	Gasch_2017
YOR271C	RiBi	Gasch_2017
YOR272W	RiBi	Gasch_2017
YOR276W	RiBi	Gasch_2017
YOR277C	RiBi	Gasch_2017
YOR287C	RiBi	Gasch_2017
YOR294W	RiBi	Gasch_2017
YOR309C	RiBi	Gasch_2017
YOR310C	RiBi	Gasch_2017
YOR361C	RiBi	Gasch_2017
YPL037C	RiBi	Gasch_2017
YPL043W	RiBi	Gasch_2017
YPL086C	RiBi	Gasch_2017
YPL146C	RiBi	Gasch_2017
YPL160W	RiBi	Gasch_2017
YPL183C	RiBi	Gasch_2017
YPL207W	RiBi	Gasch_2017
YPL211W	RiBi	Gasch_2017
YPL212C	RiBi	Gasch_2017
YPL217C	RiBi	Gasch_2017
YPL226W	RiBi	Gasch_2017
YPL235W	RiBi	Gasch_2017
YPL237W	RiBi	Gasch_2017
YPL238C	RiBi	Gasch_2017
YPL245W	RiBi	Gasch_2017
YPL263C	RiBi	Gasch_2017
YPL266W	RiBi	Gasch_2017
YPL273W	RiBi	Gasch_2017
YPR010C	RiBi	Gasch_2017
YPR016C	RiBi	Gasch_2017
YPR033C	RiBi	Gasch_2017
YPR034W	RiBi	Gasch_2017
YPR041W	RiBi	Gasch_2017
YPR060C	RiBi	Gasch_2017
YPR074C	RiBi	Gasch_2017
YPR080W	RiBi	Gasch_2017
YPR110C	RiBi	Gasch_2017
YPR112C	RiBi	Gasch_2017
YPR118W	RiBi	Gasch_2017
YPR137W	RiBi	Gasch_2017
YPR143W	RiBi	Gasch_2017
YPR144C	RiBi	Gasch_2017
YPR145W	RiBi	Gasch_2017
YPR163C	RiBi	Gasch_2017
YPR169W	RiBi	Gasch_2017
YPR187W	RiBi	Gasch_2017
YPR190C	RiBi	Gasch_2017
YHR126C	M/G1	Spellman_1998
YOR066W	M/G1	Spellman_1998
YHR092C	M/G1	Spellman_1998
YDL179W	M/G1	Spellman_1998
YEL032W	M/G1	Spellman_1998
YNL160W	M/G1	Spellman_1998
YJL044C	M/G1	Spellman_1998
YKR103W	M/G1	Spellman_1998
YJL194W	M/G1	Spellman_1998
YHR005C	M/G1	Spellman_1998
YLR274W	M/G1	Spellman_1998
YJL195C	M/G1	Spellman_1998
YHR022C	M/G1	Spellman_1998
YMR246W	M/G1	Spellman_1998
YFL044C	M/G1	Spellman_1998
YNL192W	M/G1	Spellman_1998
YJL067W	M/G1	Spellman_1998
YBR157C	M/G1	Spellman_1998
YNL134C	M/G1	Spellman_1998
YDR157W	M/G1	Spellman_1998
YOL101C	M/G1	Spellman_1998
YDR493W	M/G1	Spellman_1998
YDR342C	M/G1	Spellman_1998
YDR191W	M/G1	Spellman_1998
YOR264W	M/G1	Spellman_1998
YDL117W	M/G1	Spellman_1998
YKL151C	M/G1	Spellman_1998
YOR127W	M/G1	Spellman_1998
YBR296C	M/G1	Spellman_1998
YLR041W	M/G1	Spellman_1998
YLR040C	M/G1	Spellman_1998
YDR055W	M/G1	Spellman_1998
YPL187W	M/G1	Spellman_1998
YLR013W	M/G1	Spellman_1998
YKL185W	M/G1	Spellman_1998
YPL158C	M/G1	Spellman_1998
YOR263C	M/G1	Spellman_1998
YNL078W	M/G1	Spellman_1998
YNL046W	M/G1	Spellman_1998
YOR052C	M/G1	Spellman_1998
YBR053C	M/G1	Spellman_1998
YDL089W	M/G1	Spellman_1998
YEL040W	M/G1	Spellman_1998
YJL159W	M/G1	Spellman_1998
YFL011W	M/G1	Spellman_1998
YOR342C	M/G1	Spellman_1998
YDR545W	M/G1	Spellman_1998
YIL009W	M/G1	Spellman_1998
YKL163W	M/G1	Spellman_1998
YKL104C	M/G1	Spellman_1998
YOR242C	M/G1	Spellman_1998
YGL032C	M/G1	Spellman_1998
YBR083W	M/G1	Spellman_1998
YFL065C	M/G1	Spellman_1998
YGL055W	M/G1	Spellman_1998
YLR452C	M/G1	Spellman_1998
YMR011W	M/G1	Spellman_1998
YML110C	M/G1	Spellman_1998
YKL164C	M/G1	Spellman_1998
YKL178C	M/G1	Spellman_1998
YJL196C	M/G1	Spellman_1998
YNR067C	M/G1	Spellman_1998
YDR085C	M/G1	Spellman_1998
YCR018C	M/G1	Spellman_1998
YER150W	M/G1	Spellman_1998
YOL011W	M/G1	Spellman_1998
YLR079W	M/G1	Spellman_1998
YFL066C	M/G1	Spellman_1998
YGR276C	M/G1	Spellman_1998
YOR126C	M/G1	Spellman_1998
YPL014W	M/G1	Spellman_1998
YGR086C	M/G1	Spellman_1998
YKL177W	M/G1	Spellman_1998
YGL037C	M/G1	Spellman_1998
YNL327W	M/G1	Spellman_1998
YFR015C	M/G1	Spellman_1998
YKL116C	M/G1	Spellman_1998
YOR317W	M/G1	Spellman_1998
YGR219W	M/G1	Spellman_1998
YNL173C	M/G1	Spellman_1998
YCL055W	M/G1	Spellman_1998
YOR018W	M/G1	Spellman_1998
YGR234W	M/G1	Spellman_1998
YLR273C	M/G1	Spellman_1998
YBR158W	M/G1	Spellman_1998
YIR036C	M/G1	Spellman_1998
YPL283C	M/G1	Spellman_1998
YOR230W	M/G1	Spellman_1998
YFL067W	M/G1	Spellman_1998
YBR067C	M/G1	Spellman_1998
YLR465C	M/G1	Spellman_1998
YLR194C	M/G1	Spellman_1998
YBL064C	M/G1	Spellman_1998
YIL114C	M/G1	Spellman_1998
YNL326C	M/G1	Spellman_1998
YNR044W	M/G1	Spellman_1998
YNL328C	M/G1	Spellman_1998
YDL169C	M/G1	Spellman_1998
YBR273C	M/G1	Spellman_1998
YLR463C	M/G1	Spellman_1998
YER111C	M/G1	Spellman_1998
YLR466W	M/G1	Spellman_1998
YGL090W	M/G1	Spellman_1998
YBL061C	M/G1	Spellman_1998
YBR204C	M/G1	Spellman_1998
YKL182W	M/G1	Spellman_1998
YHR094C	M/G1	Spellman_1998
YHR219W	M/G1	Spellman_1998
YJL225C	M/G1	Spellman_1998
YJR004C	M/G1	Spellman_1998
YCL040W	M/G1	Spellman_1998
YCL027W	M/G1	Spellman_1998
YPR204W	M/G1	Spellman_1998
YOR270C	G1	Spellman_1998
YLR467W	G1	Spellman_1998
YER189W	G1	Spellman_1998
YLL067C	G1	Spellman_1998
YEL076C	G1	Spellman_1998
YDR309C	G1	Spellman_1998
YEL075C	G1	Spellman_1998
YHL050C	G1	Spellman_1998
YLR464W	G1	Spellman_1998
YBL111C	G1	Spellman_1998
YJL015C	G1	Spellman_1998
YHR067W	G1	Spellman_1998
YOR308C	G1	Spellman_1998
YBL113C	G1	Spellman_1998
YLR049C	G1	Spellman_1998
YHL049C	G1	Spellman_1998
YEL077C	G1	Spellman_1998
YFL064C	G1	Spellman_1998
YOL094C	G1	Spellman_1998
YHR218W	G1	Spellman_1998
YLR032W	G1	Spellman_1998
YNL339C	G1	Spellman_1998
YLL066C	G1	Spellman_1998
YBL112C	G1	Spellman_1998
YPR203W	G1	Spellman_1998
YLR462W	G1	Spellman_1998
YHR113W	G1	Spellman_1998
YDL127W	G1	Spellman_1998
YML100W	G1	Spellman_1998
YOR307C	G1	Spellman_1998
YGL028C	G1	Spellman_1998
YER190W	G1	Spellman_1998
YML133C	G1	Spellman_1998
YDL102W	G1	Spellman_1998
YDR368W	G1	Spellman_1998
YIL177C	G1	Spellman_1998
YGR296W	G1	Spellman_1998
YDR001C	G1	Spellman_1998
YKR077W	G1	Spellman_1998
YGL089C	G1	Spellman_1998
YPR202W	G1	Spellman_1998
YHR149C	G1	Spellman_1998
YDL156W	G1	Spellman_1998
YDR507C	G1	Spellman_1998
YJR155W	G1	Spellman_1998
YDL164C	G1	Spellman_1998
YNL082W	G1	Spellman_1998
YGR041W	G1	Spellman_1998
YFR027W	G1	Spellman_1998
YDR481C	G1	Spellman_1998
YGR042W	G1	Spellman_1998
YOR033C	G1	Spellman_1998
YOR144C	G1	Spellman_1998
YGL038C	G1	Spellman_1998
YGL185C	G1	Spellman_1998
YBR071W	G1	Spellman_1998
YPL232W	G1	Spellman_1998
YKL108W	G1	Spellman_1998
YNL304W	G1	Spellman_1998
YPR018W	G1	Spellman_1998
YNL233W	G1	Spellman_1998
YMR179W	G1	Spellman_1998
YGR109C	G1	Spellman_1998
YCL042W	G1	Spellman_1998
YDR528W	G1	Spellman_1998
YER070W	G1	Spellman_1998
YKL113C	G1	Spellman_1998
YJR054W	G1	Spellman_1998
YNL273W	G1	Spellman_1998
YGR044C	G1	Spellman_1998
YEL076C-A	G1	Spellman_1998
YNL072W	G1	Spellman_1998
YDL105W	G1	Spellman_1998
YPL221W	G1	Spellman_1998
YDL163W	G1	Spellman_1998
YJL217W	G1	Spellman_1998
YJL078C	G1	Spellman_1998
YML102W	G1	Spellman_1998
YMR078C	G1	Spellman_1998
YDL103C	G1	Spellman_1998
YCL022C	G1	Spellman_1998
YDL197C	G1	Spellman_1998
YGL207W	G1	Spellman_1998
YJL181W	G1	Spellman_1998
YJR030C	G1	Spellman_1998
YNL102W	G1	Spellman_1998
YCL024W	G1	Spellman_1998
YNL309W	G1	Spellman_1998
YLR457C	G1	Spellman_1998
YGR238C	G1	Spellman_1998
YPL057C	G1	Spellman_1998
YPR175W	G1	Spellman_1998
YPR160W	G1	Spellman_1998
YCL023C	G1	Spellman_1998
YPL267W	G1	Spellman_1998
YPL153C	G1	Spellman_1998
YKL045W	G1	Spellman_1998
YCL060C	G1	Spellman_1998
YAR003W	G1	Spellman_1998
YPR120C	G1	Spellman_1998
YDL010W	G1	Spellman_1998
YAR008W	G1	Spellman_1998
YBL035C	G1	Spellman_1998
YFL008W	G1	Spellman_1998
YOR355W	G1	Spellman_1998
YJL073W	G1	Spellman_1998
YDL227C	G1	Spellman_1998
YNL312W	G1	Spellman_1998
YPR174C	G1	Spellman_1998
YPR135W	G1	Spellman_1998
YBR108W	G1	Spellman_1998
YEL064C	G1	Spellman_1998
YJL074C	G1	Spellman_1998
YDR097C	G1	Spellman_1998
YHR123W	G1	Spellman_1998
YMR048W	G1	Spellman_1998
YNL225C	G1	Spellman_1998
YLR233C	G1	Spellman_1998
YLR286C	G1	Spellman_1998
YNL231C	G1	Spellman_1998
YLR103C	G1	Spellman_1998
YDR307W	G1	Spellman_1998
YGR152C	G1	Spellman_1998
YBR070C	G1	Spellman_1998
YCL061C	G1	Spellman_1998
YHR106W	G1	Spellman_1998
YIL104C	G1	Spellman_1998
YOL034W	G1	Spellman_1998
YDL011C	G1	Spellman_1998
YOR074C	G1	Spellman_1998
YIL066C	G1	Spellman_1998
YIL026C	G1	Spellman_1998
YNL015W	G1	Spellman_1998
YDR503C	G1	Spellman_1998
YGR151C	G1	Spellman_1998
YPL163C	G1	Spellman_1998
YJL115W	G1	Spellman_1998
YLR313C	G1	Spellman_1998
YBR088C	G1	Spellman_1998
YGL163C	G1	Spellman_1998
YPL255W	G1	Spellman_1998
YDL003W	G1	Spellman_1998
YOR321W	G1	Spellman_1998
YMR076C	G1	Spellman_1998
YKL042W	G1	Spellman_1998
YKL165C	G1	Spellman_1998
YCR065W	G1	Spellman_1998
YML060W	G1	Spellman_1998
YAR007C	G1	Spellman_1998
YLL002W	G1	Spellman_1998
YGR221C	G1	Spellman_1998
YLR458W	G1	Spellman_1998
YML020W	G1	Spellman_1998
YDR440W	G1	Spellman_1998
YKL103C	G1	Spellman_1998
YOL017W	G1	Spellman_1998
YGR189C	G1	Spellman_1998
YER124C	G1	Spellman_1998
YLR212C	G1	Spellman_1998
YER149C	G1	Spellman_1998
YDR144C	G1	Spellman_1998
YBR087W	G1	Spellman_1998
YML027W	G1	Spellman_1998
YHR153C	G1	Spellman_1998
YDR053W	G1	Spellman_1998
YHR159W	G1	Spellman_1998
YLR235C	G1	Spellman_1998
YOR075W	G1	Spellman_1998
YBR073W	G1	Spellman_1998
YGR153W	G1	Spellman_1998
YJL187C	G1	Spellman_1998
YOR115C	G1	Spellman_1998
YNL181W	G1	Spellman_1998
YHR143W	G1	Spellman_1998
YNL289W	G1	Spellman_1998
YLR236C	G1	Spellman_1998
YHR127W	G1	Spellman_1998
YLR183C	G1	Spellman_1998
YOR320C	G1	Spellman_1998
YBR089W	G1	Spellman_1998
YPL256C	G1	Spellman_1998
YFL060C	G1	Spellman_1998
YLR343W	G1	Spellman_1998
YNL262W	G1	Spellman_1998
YDL018C	G1	Spellman_1998
YPL209C	G1	Spellman_1998
YKL089W	G1	Spellman_1998
YIL141W	G1	Spellman_1998
YER170W	G1	Spellman_1998
YER095W	G1	Spellman_1998
YMR199W	G1	Spellman_1998
YDR279W	G1	Spellman_1998
YGL195W	G1	Spellman_1998
YHR110W	G1	Spellman_1998
YJR043C	G1	Spellman_1998
YOL007C	G1	Spellman_1998
YLL022C	G1	Spellman_1998
YOL019W	G1	Spellman_1998
YOL090W	G1	Spellman_1998
YJR154W	G1	Spellman_1998
YLR231C	G1	Spellman_1998
YIL132C	G1	Spellman_1998
YLR135W	G1	Spellman_1998
YNL300W	G1	Spellman_1998
YJR006W	G1	Spellman_1998
YJL018W	G1	Spellman_1998
YDL101C	G1	Spellman_1998
YKR012C	G1	Spellman_1998
YJR148W	G1	Spellman_1998
YKR091W	G1	Spellman_1998
YLR121C	G1	Spellman_1998
YDL095W	G1	Spellman_1998
YDL093W	G1	Spellman_1998
YLR234W	G1	Spellman_1998
YKR090W	G1	Spellman_1998
YLR050C	G1	Spellman_1998
YIL140W	G1	Spellman_1998
YAL053W	G1	Spellman_1998
YIL025C	G1	Spellman_1998
YDR461W	G1	Spellman_1998
YKR013W	G1	Spellman_1998
YDR400W	G1	Spellman_1998
YJL072C	G1	Spellman_1998
YNL169C	G1	Spellman_1998
YER152C	G1	Spellman_1998
YMR305C	G1	Spellman_1998
YPL208W	G1	Spellman_1998
YDR501W	G1	Spellman_1998
YML061C	G1	Spellman_1998
YML021C	G1	Spellman_1998
YLR151C	G1	Spellman_1998
YGR014W	G1	Spellman_1998
YDR353W	G1	Spellman_1998
YPL241C	G1	Spellman_1998
YGL061C	G1	Spellman_1998
YLR383W	G1	Spellman_1998
YKL101W	G1	Spellman_1998
YBR007C	G1	Spellman_1998
YDL096C	G1	Spellman_1998
YOR248W	G1	Spellman_1998
YOR176W	G1	Spellman_1998
YIL076W	G1	Spellman_1998
YOR114W	G1	Spellman_1998
YOR247W	G1	Spellman_1998
YNL165W	G1	Spellman_1998
YER001W	G1	Spellman_1998
YKL066W	G1	Spellman_1998
YGL060W	G1	Spellman_1998
YJL019W	G1	Spellman_1998
YLR154C	G1	Spellman_1998
YHR154W	G1	Spellman_1998
YOR283W	G1	Spellman_1998
YER118C	G1	Spellman_1998
YDL211C	G1	Spellman_1998
YBR161W	G1	Spellman_1998
YOR083W	G1	Spellman_1998
YGR188C	G1	Spellman_1998
YER016W	G1	Spellman_1998
YEL047C	G1	Spellman_1998
YDL157C	G1	Spellman_1998
YHR173C	G1	Spellman_1998
YKL067W	G1	Spellman_1998
YOR195W	G1	Spellman_1998
YJL091C	G1	Spellman_1998
YML109W	G1	Spellman_1998
YPL124W	G1	Spellman_1998
YGL027C	G1	Spellman_1998
YLR300W	G1	Spellman_1998
YNL263C	G1	Spellman_1998
YOL016C	G1	Spellman_1998
YHR172W	G1	Spellman_1998
YPR076W	G1	Spellman_1998
YDR488C	G1	Spellman_1998
YPR106W	G1	Spellman_1998
YGL093W	G1	Spellman_1998
YOR084W	G1	Spellman_1998
YLR326W	G1	Spellman_1998
YNL126W	G1	Spellman_1998
YDR297W	G1	Spellman_1998
YNL166C	G1	Spellman_1998
YJL173C	G1	Spellman_1998
YNL208W	G1	Spellman_1998
YDR113C	G1	Spellman_1998
YLR372W	G1	Spellman_1998
YPR075C	G1	Spellman_1998
YGL200C	G1	Spellman_1998
YPR141C	G1	Spellman_1998
YBL009W	G1	Spellman_1998
YKL127W	G1	Spellman_1998
YER019W	G1	Spellman_1998
YLL012W	G1	Spellman_1998
YLR342W	G1	Spellman_1998
YDR356W	G1	Spellman_1998
YMR307W	G1	Spellman_1998
YPL032C	G1	Spellman_1998
YGR140W	G1	Spellman_1998
YDL055C	G1	Spellman_1998
YGR055W	G1	Spellman_1998
YLR380W	G1	Spellman_1998
YOR372C	G1	Spellman_1998
YEL061C	S	Spellman_1998
YIL117C	S	Spellman_1998
YMR295C	S	Spellman_1998
YBR009C	S	Spellman_1998
YNL030W	S	Spellman_1998
YOR250C	S	Spellman_1998
YBR010W	S	Spellman_1998
YPL054W	S	Spellman_1998
YIL144W	S	Spellman_1998
YJL201W	S	Spellman_1998
YBL002W	S	Spellman_1998
YDR355C	S	Spellman_1998
YGL225W	S	Spellman_1998
YKL008C	S	Spellman_1998
YML117W	S	Spellman_1998
YML012W	S	Spellman_1998
YNL031C	S	Spellman_1998
YIR017C	S	Spellman_1998
YDR224C	S	Spellman_1998
YMR144W	S	Spellman_1998
YIL074C	S	Spellman_1998
YNR066C	S	Spellman_1998
YPL269W	S	Spellman_1998
YDR225W	S	Spellman_1998
YGL184C	S	Spellman_1998
YLL062C	S	Spellman_1998
YPR107C	S	Spellman_1998
YBL003C	S	Spellman_1998
YPR159W	S	Spellman_1998
YKL001C	S	Spellman_1998
YHR030C	S	Spellman_1998
YAL067C	S	Spellman_1998
YJL092W	S	Spellman_1998
YEL068C	S	Spellman_1998
YPL127C	S	Spellman_1998
YLR045C	S	Spellman_1998
YKR037C	S	Spellman_1998
YER003C	S	Spellman_1998
YGR113W	S	Spellman_1998
YEL060C	S	Spellman_1998
YHR061C	S	Spellman_1998
YNL283C	S	Spellman_1998
YDR261C	S	Spellman_1998
YER091C	S	Spellman_1998
YPL250C	S	Spellman_1998
YPL274W	S	Spellman_1998
YGR099W	S	Spellman_1998
YKR069W	S	Spellman_1998
YKR010C	S	Spellman_1998
YHR098C	S	Spellman_1998
YOR073W	S	Spellman_1998
YMR238W	S	Spellman_1998
YDR247W	S	Spellman_1998
YBL063W	S	Spellman_1998
YPR034W	S	Spellman_1998
YDR451C	S	Spellman_1998
YDR448W	S	Spellman_1998
YPL253C	S	Spellman_1998
YJL118W	S	Spellman_1998
YBR008C	S	Spellman_1998
YNR009W	S	Spellman_1998
YLR455W	S	Spellman_1998
YOL012C	S	Spellman_1998
YJL119C	S	Spellman_1998
YFR030W	S	Spellman_1998
YGL125W	S	Spellman_1998
YJR137C	S	Spellman_1998
YEL042W	S	Spellman_1998
YLL061W	S	Spellman_1998
YOR188W	S	Spellman_1998
YKL065C	S	Spellman_1998
YOR391C	G2	Spellman_1998
YJR001W	G2	Spellman_1998
YLR302C	G2	Spellman_1998
YOL058W	G2	Spellman_1998
YLR210W	G2	Spellman_1998
YLR288C	G2	Spellman_1998
YLR303W	G2	Spellman_1998
YNL276C	G2	Spellman_1998
YHR086W	G2	Spellman_1998
YLR373C	G2	Spellman_1998
YOL112W	G2	Spellman_1998
YER018C	G2	Spellman_1998
YNL216W	G2	Spellman_1998
YGL216W	G2	Spellman_1998
YOL088C	G2	Spellman_1998
YNL197C	G2	Spellman_1998
YKL035W	G2	Spellman_1998
YBR243C	G2	Spellman_1998
YGR124W	G2	Spellman_1998
YJR010W	G2	Spellman_1998
YIL135C	G2	Spellman_1998
YIR010W	G2	Spellman_1998
YKL048C	G2	Spellman_1998
YHR208W	G2	Spellman_1998
YJL060W	G2	Spellman_1998
YNL043C	G2	Spellman_1998
YPL116W	G2	Spellman_1998
YKL096W	G2	Spellman_1998
YBR256C	G2	Spellman_1998
YMR163C	G2	Spellman_1998
YIL129C	G2	Spellman_1998
YJL099W	G2	Spellman_1998
YMR215W	G2	Spellman_1998
YER042W	G2	Spellman_1998
YKL052C	G2	Spellman_1998
YER032W	G2	Spellman_1998
YLR180W	G2	Spellman_1998
YDR302W	G2	Spellman_1998
YLR209C	G2	Spellman_1998
YHR178W	G2	Spellman_1998
YIL123W	G2	Spellman_1998
YMR003W	G2	Spellman_1998
YOR324C	G2	Spellman_1998
YMR198W	G2	Spellman_1998
YEL017W	G2	Spellman_1998
YHR006W	G2	Spellman_1998
YPR167C	G2	Spellman_1998
YPR155C	G2	Spellman_1998
YPL264C	G2	Spellman_1998
YOR323C	G2	Spellman_1998
YLR225C	G2	Spellman_1998
YHR108W	G2	Spellman_1998
YHR146W	G2	Spellman_1998
YPL133C	G2	Spellman_1998
YNL176C	G2	Spellman_1998
YIL131C	G2	Spellman_1998
YGL101W	G2	Spellman_1998
YDR130C	G2	Spellman_1998
YKR041W	G2	Spellman_1998
YGL212W	G2	Spellman_1998
YHR135C	G2	Spellman_1998
YJL134W	G2	Spellman_1998
YMR278W	G2	Spellman_1998
YMR055C	G2	Spellman_1998
YKL069W	G2	Spellman_1998
YPL128C	G2	Spellman_1998
YCR069W	G2	Spellman_1998
YIL050W	G2	Spellman_1998
YJL158C	G2	Spellman_1998
YJL137C	G2	Spellman_1998
YNL003C	G2	Spellman_1998
YOL114C	G2	Spellman_1998
YIL072W	G2	Spellman_1998
YOR332W	G2	Spellman_1998
YLR142W	G2	Spellman_1998
YML125C	G2	Spellman_1998
YML065W	G2	Spellman_1998
YOR235W	G2	Spellman_1998
YFL037W	G2	Spellman_1998
YJR048W	G2	Spellman_1998
YBL052C	G2	Spellman_1998
YPL025C	G2	Spellman_1998
YJR110W	G2	Spellman_1998
YLR056W	G2	Spellman_1998
YCL062W	G2	Spellman_1998
YDR149C	G2	Spellman_1998
YPL075W	G2	Spellman_1998
YOR337W	G2	Spellman_1998
YBR133C	G2	Spellman_1998
YDR089W	G2	Spellman_1998
YCL025C	G2	Spellman_1998
YDR346C	G2	Spellman_1998
YMR183C	G2	Spellman_1998
YLR437C	G2	Spellman_1998
YDR011W	G2	Spellman_1998
YCLX09W	G2	Spellman_1998
YMR002W	G2	Spellman_1998
YIL138C	G2	Spellman_1998
YLR058C	G2	Spellman_1998
YLR099C	G2	Spellman_1998
YML072C	G2	Spellman_1998
YOL030W	G2	Spellman_1998
YCL013W	G2	Spellman_1998
YOR152C	G2	Spellman_1998
YLL032C	G2	Spellman_1998
YLR169W	G2	Spellman_1998
YGR138C	G2	Spellman_1998
YDR029W	G2	Spellman_1998
YPL155C	G2	Spellman_1998
YPL141C	G2	Spellman_1998
YCL014W	G2	Spellman_1998
YML058W	G2	Spellman_1998
YKL004W	G2	Spellman_1998
YPL021W	G2	Spellman_1998
YKL183W	G2	Spellman_1998
YKL096W-A	G2	Spellman_1998
YCR002C	G2	Spellman_1998
YKR039W	G2	Spellman_1998
YCL063W	G2	Spellman_1998
YPR111W	M	Spellman_1998
YDR150W	G2	Spellman_1998
YNL037C	M	Spellman_1998
YIL158W	M	Spellman_1998
YCL012W	M	Spellman_1998
YPR045C	M	Spellman_1998
YHR205W	M	Spellman_1998
YOR153W	M	Spellman_1998
YOR105W	M	Spellman_1998
YBR242W	M	Spellman_1998
YIL011W	M	Spellman_1998
YKR046C	M	Spellman_1998
YOL069W	M	Spellman_1998
YGL021W	M	Spellman_1998
YOR129C	M	Spellman_1998
YMR015C	M	Spellman_1998
YOL014W	M	Spellman_1998
YJR092W	M	Spellman_1998
YML120C	M	Spellman_1998
YBR086C	M	Spellman_1998
YIL094C	M	Spellman_1998
YNL171C	M	Spellman_1998
YOR298W	M	Spellman_1998
YGR035C	M	Spellman_1998
YML034W	M	Spellman_1998
YNL172W	M	Spellman_1998
YPR014C	M	Spellman_1998
YHR137W	M	Spellman_1998
YFR039C	M	Spellman_1998
YOR315W	M	Spellman_1998
YHL028W	M	Spellman_1998
YJL051W	M	Spellman_1998
YML052W	M	Spellman_1998
YLR098C	M	Spellman_1998
YML033W	M	Spellman_1998
YLR353W	M	Spellman_1998
YGR279C	M	Spellman_1998
YML123C	M	Spellman_1998
YMR189W	M	Spellman_1998
YPL265W	M	Spellman_1998
YPL111W	M	Spellman_1998
YPR013C	M	Spellman_1998
YGR240C	M	Spellman_1998
YMR001C	M	Spellman_1998
YIL056W	M	Spellman_1998
YMR145C	M	Spellman_1998
YMR202W	M	Spellman_1998
YLR131C	M	Spellman_1998
YOR025W	M	Spellman_1998
YHR023W	M	Spellman_1998
YPR128C	M	Spellman_1998
YOR258W	M	Spellman_1998
YKL172W	M	Spellman_1998
YGR108W	M	Spellman_1998
YJR003C	M	Spellman_1998
YPR156C	M	Spellman_1998
YLR438W	M	Spellman_1998
YPR119W	M	Spellman_1998
YML035C-A	M	Spellman_1998
YIL122W	M	Spellman_1998
YIL106W	M	Spellman_1998
YGL255W	M	Spellman_1998
YKL130C	M	Spellman_1998
YGL209W	M	Spellman_1998
YDR146C	M	Spellman_1998
YBR138C	M	Spellman_1998
YDR276C	M	Spellman_1998
YPR157W	M	Spellman_1998
YLR214W	M	Spellman_1998
YPL242C	M	Spellman_1998
YLR084C	M	Spellman_1998
YHR029C	M	Spellman_1998
YML116W	M	Spellman_1998
YIL162W	M	Spellman_1998
YKR021W	M	Spellman_1998
YPR138C	M	Spellman_1998
YOR104W	M	Spellman_1998
YDL048C	M	Spellman_1998
YOL132W	M	Spellman_1998
YOR256C	M	Spellman_1998
YPR149W	M	Spellman_1998
YNL111C	M	Spellman_1998
YLR034C	M	Spellman_1998
YOR058C	M	Spellman_1998
YGR176W	M	Spellman_1998
YLR190W	M	Spellman_1998
YBR139W	M	Spellman_1998
YCRX05W	M	Spellman_1998
YGR259C	M	Spellman_1998
YMR032W	M	Spellman_1998
YGR177C	M	Spellman_1998
YNR050C	M	Spellman_1998
YPL058C	M	Spellman_1998
YOL158C	M	Spellman_1998
YDR432W	M	Spellman_1998
YDL180W	M	Spellman_1998
YLL028W	M	Spellman_1998
YLR095C	M	Spellman_1998
YML066C	M	Spellman_1998
YBL030C	M	Spellman_1998
YGL008C	M	Spellman_1998
YIL119C	M	Spellman_1998
YBL098W	M	Spellman_1998
YML119W	M	Spellman_1998
YCL043C	M	Spellman_1998
YBR038W	M	Spellman_1998
YMR058W	M	Spellman_1998
YBL100C	M	Spellman_1998
YEL065W	M	Spellman_1998
YCR024C-A	M	Spellman_1998
YML064C	M	Spellman_1998
YKL043W	M	Spellman_1998
YPL036W	M	Spellman_1998
YGL116W	M	Spellman_1998
YOR314W	M	Spellman_1998
YOR023C	M	Spellman_1998
YOR383C	M	Spellman_1998
YOR313C	M	Spellman_1998
YGL162W	M	Spellman_1998
YBR093C	M	Spellman_1998
YOL150C	M	Spellman_1998
YCL038C	M	Spellman_1998
YOR273C	M	Spellman_1998
YGR260W	M	Spellman_1998
YBR094W	M	Spellman_1998
YHR152W	M	Spellman_1998
YKL044W	M	Spellman_1998
YBR069C	M	Spellman_1998
YOL119C	M	Spellman_1998
YLR057W	M	Spellman_1998
YMR253C	M	Spellman_1998
YHL040C	M	Spellman_1998
YOR049C	M	Spellman_1998
YNL058C	M	Spellman_1998
YGR143W	M	Spellman_1998
YOL070C	M	Spellman_1998
YEL025C	M	Spellman_1998
YHR151C	M	Spellman_1998
YGR284C	M	Spellman_1998
YPL095C	M	Spellman_1998
YLR100W	M	Spellman_1998
YNL056W	M	Spellman_1998
YDL039C	M	Spellman_1998
YAL040C	M	Spellman_1998
YMR031C	M	Spellman_1998
YDL037C	M	Spellman_1998
YHR215W	M	Spellman_1998
YDR033W	M	Spellman_1998
YNL057W	M	Spellman_1998
YMR254C	M	Spellman_1998
YER145C	M	Spellman_1998
YBR092C	M	Spellman_1998
YHL026C	M	Spellman_1998
YPL061W	M	Spellman_1998
YGR065C	M	Spellman_1998
YGR146C	M	Spellman_1998
YGR092W	M	Spellman_1998
YML050W	M	Spellman_1998
YCL065W	M	Spellman_1998
YBR287W	M	Spellman_1998
YLR254C	M	Spellman_1998
YIL168W	M	Spellman_1998
YKR042W	M	Spellman_1998
YAR018C	M	Spellman_1998
YLR297W	M	Spellman_1998
YKR079C	M	Spellman_1998
YOR229W	M	Spellman_1998
YDR380W	M	Spellman_1998
YCR040W	M	Spellman_1998
YCL066W	M	Spellman_1998
YLR413W	M	Spellman_1998
YDL128W	M	Spellman_1998
YIL121W	M	Spellman_1998
YCR042C	M	Spellman_1998
YAL022C	M	Spellman_1998
YDR190C	M	Spellman_1998
YAR071W	M	Spellman_1998
YCR041W	M	Spellman_1998
YBR200W	M	Spellman_1998
YNL145W	M	Spellman_1998
YBR202W	M	Spellman_1998
YBR054W	M	Spellman_1998
YKL209C	M	Spellman_1998
YDL138W	M	Spellman_1998
YFL026W	M	Spellman_1998
YDR337W	M	Spellman_1998
YBL023C	M	Spellman_1998
YFL006W	M	Spellman_1998
YJL079C	M	Spellman_1998
YLR347C	M	Spellman_1998
YPR019W	M	Spellman_1998
YJL157C	M	Spellman_1998
YGL201C	M	Spellman_1998
YFR002W	M	Spellman_1998
YIL167W	M	Spellman_1998
YGR230W	M	Spellman_1998
YDR077W	M	Spellman_1998
Q0020	Mito	SGD
Q0045	Mito	SGD
Q0060	Mito	SGD
Q0050	Mito	SGD
Q0055	Mito	SGD
Q0070	Mito	SGD
Q0065	Mito	SGD
Q0075	Mito	SGD
Q0080	Mito	SGD
Q0085	Mito	SGD
Q0120	Mito	SGD
Q0110	Mito	SGD
Q0115	Mito	SGD
Q0105	Mito	SGD
Q0130	Mito	SGD
Q0140	Mito	SGD
Q0158	Mito	SGD
Q0160	Mito	SGD
Q0250	Mito	SGD
Q0255	Mito	SGD
Q0275	Mito	SGD

## Sheet: Prereview STABLE5
Figure	Label	Normalization	Tranformation	Imputation	Tasking	Input_Data	Priors	Gold Standard	Conditions	Size	Count	Seed	AUPR	N_CONF	N_PREC
Figure_5a	Shuffled		Log2		STL	Single_Cell_Data	Shuffled	Tchourine_2018	ALL	1	38225	42	0.0209375	11479	0
Figure_5a	Shuffled		Log2		STL	Single_Cell_Data	Shuffled	Tchourine_2018	ALL	1	38225	43	0.0245225	11151	0
Figure_5a	Shuffled		Log2		STL	Single_Cell_Data	Shuffled	Tchourine_2018	ALL	1	38225	44	0.0185957	11430	0
Figure_5a	Shuffled		Log2		STL	Single_Cell_Data	Shuffled	Tchourine_2018	ALL	1	38225	45	0.0263143	11647	0
Figure_5a	Shuffled		Log2		STL	Single_Cell_Data	Shuffled	Tchourine_2018	ALL	1	38225	46	0.0247223	11305	0
Figure_5a	Shuffled		Log2		STL	Single_Cell_Data	Shuffled	Tchourine_2018	ALL	1	38225	47	0.0222703	11015	0
Figure_5a	Shuffled		Log2		STL	Single_Cell_Data	Shuffled	Tchourine_2018	ALL	1	38225	48	0.0206117	11406	0
Figure_5a	Shuffled		Log2		STL	Single_Cell_Data	Shuffled	Tchourine_2018	ALL	1	38225	49	0.0253134	10789	0
Figure_5a	Shuffled		Log2		STL	Single_Cell_Data	Shuffled	Tchourine_2018	ALL	1	38225	50	0.0196202	10279	0
Figure_5a	Shuffled		Log2		STL	Single_Cell_Data	Shuffled	Tchourine_2018	ALL	1	38225	51	0.026992	11543	0
Figure_5a	Neg Data		Log2		STL	Simulated_Neg_Data		Tchourine_2018	ALL	1	38225	42	0.0632424	10902	0
Figure_5a	Neg Data		Log2		STL	Simulated_Neg_Data		Tchourine_2018	ALL	1	38225	43	0.0859559	11089	588
Figure_5a	Neg Data		Log2		STL	Simulated_Neg_Data		Tchourine_2018	ALL	1	38225	44	0.0852597	10109	0
Figure_5a	Neg Data		Log2		STL	Simulated_Neg_Data		Tchourine_2018	ALL	1	38225	45	0.0746423	10600	0
Figure_5a	Neg Data		Log2		STL	Simulated_Neg_Data		Tchourine_2018	ALL	1	38225	46	0.084936	10957	558
Figure_5a	Neg Data		Log2		STL	Simulated_Neg_Data		Tchourine_2018	ALL	1	38225	47	0.0815629	10145	0
Figure_5a	Neg Data		Log2		STL	Simulated_Neg_Data		Tchourine_2018	ALL	1	38225	48	0.0949643	11636	555
Figure_5a	Neg Data		Log2		STL	Simulated_Neg_Data		Tchourine_2018	ALL	1	38225	49	0.077069	11583	0
Figure_5a	Neg Data		Log2		STL	Simulated_Neg_Data		Tchourine_2018	ALL	1	38225	50	0.0795835	10832	0
Figure_5a	Neg Data		Log2		STL	Simulated_Neg_Data		Tchourine_2018	ALL	1	38225	51	0.0798457	10731	0
Figure_5a	No Impute		Log2		STL	Single_Cell_Data		Tchourine_2018	ALL	1	38225	42	0.201302	11346	1036
Figure_5a	No Impute		Log2		STL	Single_Cell_Data		Tchourine_2018	ALL	1	38225	43	0.201027	11161	980
Figure_5a	No Impute		Log2		STL	Single_Cell_Data		Tchourine_2018	ALL	1	38225	44	0.229105	10973	1240
Figure_5a	No Impute		Log2		STL	Single_Cell_Data		Tchourine_2018	ALL	1	38225	45	0.172588	11215	794
Figure_5a	No Impute		Log2		STL	Single_Cell_Data		Tchourine_2018	ALL	1	38225	46	0.20479	11031	1037
Figure_5a	No Impute		Log2		STL	Single_Cell_Data		Tchourine_2018	ALL	1	38225	47	0.205499	11520	952
Figure_5a	No Impute		Log2		STL	Single_Cell_Data		Tchourine_2018	ALL	1	38225	48	0.211652	11182	1104
Figure_5a	No Impute		Log2		STL	Single_Cell_Data		Tchourine_2018	ALL	1	38225	49	0.177547	11382	804
Figure_5a	No Impute		Log2		STL	Single_Cell_Data		Tchourine_2018	ALL	1	38225	50	0.17831	11455	688
Figure_5a	No Impute		Log2		STL	Single_Cell_Data		Tchourine_2018	ALL	1	38225	51	0.209175	11190	950
Figure_5a	ScImpute		Log2	ScImpute	STL	SCIMPUTE_DATA		Tchourine_2018	ALL	1	38225	42	0.165835	9957	731
Figure_5a	ScImpute		Log2	ScImpute	STL	SCIMPUTE_DATA		Tchourine_2018	ALL	1	38225	43	0.170989	9958	1050
Figure_5a	ScImpute		Log2	ScImpute	STL	SCIMPUTE_DATA		Tchourine_2018	ALL	1	38225	44	0.20463	9480	1081
Figure_5a	ScImpute		Log2	ScImpute	STL	SCIMPUTE_DATA		Tchourine_2018	ALL	1	38225	45	0.147122	9783	753
Figure_5a	ScImpute		Log2	ScImpute	STL	SCIMPUTE_DATA		Tchourine_2018	ALL	1	38225	46	0.197105	10291	1232
Figure_5a	ScImpute		Log2	ScImpute	STL	SCIMPUTE_DATA		Tchourine_2018	ALL	1	38225	47	0.192729	10463	963
Figure_5a	ScImpute		Log2	ScImpute	STL	SCIMPUTE_DATA		Tchourine_2018	ALL	1	38225	48	0.186196	9978	1029
Figure_5a	ScImpute		Log2	ScImpute	STL	SCIMPUTE_DATA		Tchourine_2018	ALL	1	38225	49	0.149135	10035	896
Figure_5a	ScImpute		Log2	ScImpute	STL	SCIMPUTE_DATA		Tchourine_2018	ALL	1	38225	50	0.177344	10523	878
Figure_5a	ScImpute		Log2	ScImpute	STL	SCIMPUTE_DATA		Tchourine_2018	ALL	1	38225	51	0.208872	10397	1187
Figure_5a	VIPER		Log2	VIPER	STL	VIPER_Data		Tchourine_2018	ALL	1	38225	42	0.199405	11997	930
Figure_5a	VIPER		Log2	VIPER	STL	VIPER_Data		Tchourine_2018	ALL	1	38225	43	0.195463	11684	984
Figure_5a	VIPER		Log2	VIPER	STL	VIPER_Data		Tchourine_2018	ALL	1	38225	44	0.228944	11682	1367
Figure_5a	VIPER		Log2	VIPER	STL	VIPER_Data		Tchourine_2018	ALL	1	38225	45	0.17268	11987	838
Figure_5a	VIPER		Log2	VIPER	STL	VIPER_Data		Tchourine_2018	ALL	1	38225	46	0.198846	11725	1063
Figure_5a	VIPER		Log2	VIPER	STL	VIPER_Data		Tchourine_2018	ALL	1	38225	47	0.214029	11987	1002
Figure_5a	VIPER		Log2	VIPER	STL	VIPER_Data		Tchourine_2018	ALL	1	38225	48	0.214707	11703	1144
Figure_5a	VIPER		Log2	VIPER	STL	VIPER_Data		Tchourine_2018	ALL	1	38225	49	0.173941	12093	779
Figure_5a	VIPER		Log2	VIPER	STL	VIPER_Data		Tchourine_2018	ALL	1	38225	50	0.17838	11982	794
Figure_5a	VIPER		Log2	VIPER	STL	VIPER_Data		Tchourine_2018	ALL	1	38225	51	0.213655	11910	1034
Figure_5a	MAGIC		Sqrt	MAGIC	STL	MAGIC_Data		Tchourine_2018	ALL	1	38225	42	0.0923921	13213	563
Figure_5a	MAGIC		Sqrt	MAGIC	STL	MAGIC_Data		Tchourine_2018	ALL	1	38225	43	0.0863372	13253	395
Figure_5a	MAGIC		Sqrt	MAGIC	STL	MAGIC_Data		Tchourine_2018	ALL	1	38225	44	0.0987372	13286	680
Figure_5a	MAGIC		Sqrt	MAGIC	STL	MAGIC_Data		Tchourine_2018	ALL	1	38225	45	0.0899583	13343	382
Figure_5a	MAGIC		Sqrt	MAGIC	STL	MAGIC_Data		Tchourine_2018	ALL	1	38225	46	0.119637	13411	629
Figure_5a	MAGIC		Sqrt	MAGIC	STL	MAGIC_Data		Tchourine_2018	ALL	1	38225	47	0.0755088	13317	291
Figure_5a	MAGIC		Sqrt	MAGIC	STL	MAGIC_Data		Tchourine_2018	ALL	1	38225	48	0.0990283	13199	382
Figure_5a	MAGIC		Sqrt	MAGIC	STL	MAGIC_Data		Tchourine_2018	ALL	1	38225	49	0.0817684	13200	359
Figure_5a	MAGIC		Sqrt	MAGIC	STL	MAGIC_Data		Tchourine_2018	ALL	1	38225	50	0.0844355	13323	431
Figure_5a	MAGIC		Sqrt	MAGIC	STL	MAGIC_Data		Tchourine_2018	ALL	1	38225	51	0.106637	13297	627
Figure_5b			Log2		STL	Single_Cell_Data	NONE-NoTFA	Tchourine_2018	ALL	0.01	382	42	0.023325	540	0
Figure_5b			Log2		STL	Single_Cell_Data	NONE-NoTFA	Tchourine_2018	ALL	0.01	382	43	0.0166118	885	18
Figure_5b			Log2		STL	Single_Cell_Data	NONE-NoTFA	Tchourine_2018	ALL	0.01	382	44	0.0211002	935	0
Figure_5b			Log2		STL	Single_Cell_Data	NONE-NoTFA	Tchourine_2018	ALL	0.01	382	45	0.0253014	571	33
Figure_5b			Log2		STL	Single_Cell_Data	NONE-NoTFA	Tchourine_2018	ALL	0.01	382	46	0.0269837	441	52
Figure_5b			Log2		STL	Single_Cell_Data	NONE-NoTFA	Tchourine_2018	ALL	0.01	382	47	0.0202146	740	0
Figure_5b			Log2		STL	Single_Cell_Data	NONE-NoTFA	Tchourine_2018	ALL	0.01	382	48	0.0166638	811	0
Figure_5b			Log2		STL	Single_Cell_Data	NONE-NoTFA	Tchourine_2018	ALL	0.01	382	49	0.0208224	694	0
Figure_5b			Log2		STL	Single_Cell_Data	NONE-NoTFA	Tchourine_2018	ALL	0.01	382	50	0.0237071	712	12
Figure_5b			Log2		STL	Single_Cell_Data	NONE-NoTFA	Tchourine_2018	ALL	0.01	382	51	0.0177289	588	0
Figure_5b			Log2		STL	Single_Cell_Data	NONE-NoTFA	Tchourine_2018	ALL	0.025	955	42	0.0251771	1363	0
Figure_5b			Log2		STL	Single_Cell_Data	NONE-NoTFA	Tchourine_2018	ALL	0.025	955	43	0.0184228	1482	0
Figure_5b			Log2		STL	Single_Cell_Data	NONE-NoTFA	Tchourine_2018	ALL	0.025	955	44	0.0255855	1692	50
Figure_5b			Log2		STL	Single_Cell_Data	NONE-NoTFA	Tchourine_2018	ALL	0.025	955	45	0.0241864	1375	0
Figure_5b			Log2		STL	Single_Cell_Data	NONE-NoTFA	Tchourine_2018	ALL	0.025	955	46	0.031955	1093	86
Figure_5b			Log2		STL	Single_Cell_Data	NONE-NoTFA	Tchourine_2018	ALL	0.025	955	47	0.0221062	1390	0
Figure_5b			Log2		STL	Single_Cell_Data	NONE-NoTFA	Tchourine_2018	ALL	0.025	955	48	0.0224056	1508	0
Figure_5b			Log2		STL	Single_Cell_Data	NONE-NoTFA	Tchourine_2018	ALL	0.025	955	49	0.0210887	1267	0
Figure_5b			Log2		STL	Single_Cell_Data	NONE-NoTFA	Tchourine_2018	ALL	0.025	955	50	0.0245685	1522	20
Figure_5b			Log2		STL	Single_Cell_Data	NONE-NoTFA	Tchourine_2018	ALL	0.025	955	51	0.0210443	1328	0
Figure_5b			Log2		STL	Single_Cell_Data	NONE-NoTFA	Tchourine_2018	ALL	0.05	1911	42	0.0273654	2156	19
Figure_5b			Log2		STL	Single_Cell_Data	NONE-NoTFA	Tchourine_2018	ALL	0.05	1911	43	0.0189478	2169	0
Figure_5b			Log2		STL	Single_Cell_Data	NONE-NoTFA	Tchourine_2018	ALL	0.05	1911	44	0.0248291	2523	31
Figure_5b			Log2		STL	Single_Cell_Data	NONE-NoTFA	Tchourine_2018	ALL	0.05	1911	45	0.0268456	2249	0
Figure_5b			Log2		STL	Single_Cell_Data	NONE-NoTFA	Tchourine_2018	ALL	0.05	1911	46	0.0299397	2115	79
Figure_5b			Log2		STL	Single_Cell_Data	NONE-NoTFA	Tchourine_2018	ALL	0.05	1911	47	0.0243328	2404	0
Figure_5b			Log2		STL	Single_Cell_Data	NONE-NoTFA	Tchourine_2018	ALL	0.05	1911	48	0.0240646	2368	0
Figure_5b			Log2		STL	Single_Cell_Data	NONE-NoTFA	Tchourine_2018	ALL	0.05	1911	49	0.0231747	2385	0
Figure_5b			Log2		STL	Single_Cell_Data	NONE-NoTFA	Tchourine_2018	ALL	0.05	1911	50	0.0262265	2290	0
Figure_5b			Log2		STL	Single_Cell_Data	NONE-NoTFA	Tchourine_2018	ALL	0.05	1911	51	0.0226278	2256	0
Figure_5b			Log2		STL	Single_Cell_Data	NONE-NoTFA	Tchourine_2018	ALL	0.1	3822	42	0.0291961	3855	0
Figure_5b			Log2		STL	Single_Cell_Data	NONE-NoTFA	Tchourine_2018	ALL	0.1	3822	43	0.0193235	3730	0
Figure_5b			Log2		STL	Single_Cell_Data	NONE-NoTFA	Tchourine_2018	ALL	0.1	3822	44	0.028256	3852	32
Figure_5b			Log2		STL	Single_Cell_Data	NONE-NoTFA	Tchourine_2018	ALL	0.1	3822	45	0.0286042	3763	0
Figure_5b			Log2		STL	Single_Cell_Data	NONE-NoTFA	Tchourine_2018	ALL	0.1	3822	46	0.0323264	3768	88
Figure_5b			Log2		STL	Single_Cell_Data	NONE-NoTFA	Tchourine_2018	ALL	0.1	3822	47	0.0248329	3585	0
Figure_5b			Log2		STL	Single_Cell_Data	NONE-NoTFA	Tchourine_2018	ALL	0.1	3822	48	0.0248186	3749	0
Figure_5b			Log2		STL	Single_Cell_Data	NONE-NoTFA	Tchourine_2018	ALL	0.1	3822	49	0.0239758	3928	0
Figure_5b			Log2		STL	Single_Cell_Data	NONE-NoTFA	Tchourine_2018	ALL	0.1	3822	50	0.0268224	3845	34
Figure_5b			Log2		STL	Single_Cell_Data	NONE-NoTFA	Tchourine_2018	ALL	0.1	3822	51	0.0244771	3948	0
Figure_5b			Log2		STL	Single_Cell_Data	NONE-NoTFA	Tchourine_2018	ALL	0.25	9556	42	0.0303473	6466	0
Figure_5b			Log2		STL	Single_Cell_Data	NONE-NoTFA	Tchourine_2018	ALL	0.25	9556	43	0.0214602	6613	0
Figure_5b			Log2		STL	Single_Cell_Data	NONE-NoTFA	Tchourine_2018	ALL	0.25	9556	44	0.0258241	6575	26
Figure_5b			Log2		STL	Single_Cell_Data	NONE-NoTFA	Tchourine_2018	ALL	0.25	9556	45	0.0281403	6441	0
Figure_5b			Log2		STL	Single_Cell_Data	NONE-NoTFA	Tchourine_2018	ALL	0.25	9556	46	0.0322456	6444	81
Figure_5b			Log2		STL	Single_Cell_Data	NONE-NoTFA	Tchourine_2018	ALL	0.25	9556	47	0.0246912	6475	0
Figure_5b			Log2		STL	Single_Cell_Data	NONE-NoTFA	Tchourine_2018	ALL	0.25	9556	48	0.0231085	6342	0
Figure_5b			Log2		STL	Single_Cell_Data	NONE-NoTFA	Tchourine_2018	ALL	0.25	9556	49	0.0264849	6259	0
Figure_5b			Log2		STL	Single_Cell_Data	NONE-NoTFA	Tchourine_2018	ALL	0.25	9556	50	0.0285186	6260	45
Figure_5b			Log2		STL	Single_Cell_Data	NONE-NoTFA	Tchourine_2018	ALL	0.25	9556	51	0.0260802	6344	0
Figure_5b			Log2		STL	Single_Cell_Data	NONE-NoTFA	Tchourine_2018	ALL	0.5	19112	42	0.0300022	8207	0
Figure_5b			Log2		STL	Single_Cell_Data	NONE-NoTFA	Tchourine_2018	ALL	0.5	19112	43	0.0233851	8184	0
Figure_5b			Log2		STL	Single_Cell_Data	NONE-NoTFA	Tchourine_2018	ALL	0.5	19112	44	0.0260176	8399	33
Figure_5b			Log2		STL	Single_Cell_Data	NONE-NoTFA	Tchourine_2018	ALL	0.5	19112	45	0.0293626	8322	0
Figure_5b			Log2		STL	Single_Cell_Data	NONE-NoTFA	Tchourine_2018	ALL	0.5	19112	46	0.0336458	8310	78
Figure_5b			Log2		STL	Single_Cell_Data	NONE-NoTFA	Tchourine_2018	ALL	0.5	19112	47	0.0258508	8218	0
Figure_5b			Log2		STL	Single_Cell_Data	NONE-NoTFA	Tchourine_2018	ALL	0.5	19112	48	0.0258461	8113	0
Figure_5b			Log2		STL	Single_Cell_Data	NONE-NoTFA	Tchourine_2018	ALL	0.5	19112	49	0.0270928	8202	0
Figure_5b			Log2		STL	Single_Cell_Data	NONE-NoTFA	Tchourine_2018	ALL	0.5	19112	50	0.0299193	8197	45
Figure_5b			Log2		STL	Single_Cell_Data	NONE-NoTFA	Tchourine_2018	ALL	0.5	19112	51	0.0268474	8299	0
Figure_5b			Log2		STL	Single_Cell_Data	NONE-NoTFA	Tchourine_2018	ALL	0.75	28668	42	0.0294865	8997	0
Figure_5b			Log2		STL	Single_Cell_Data	NONE-NoTFA	Tchourine_2018	ALL	0.75	28668	43	0.0228791	9140	0
Figure_5b			Log2		STL	Single_Cell_Data	NONE-NoTFA	Tchourine_2018	ALL	0.75	28668	44	0.0254643	9212	18
Figure_5b			Log2		STL	Single_Cell_Data	NONE-NoTFA	Tchourine_2018	ALL	0.75	28668	45	0.0292736	9279	0
Figure_5b			Log2		STL	Single_Cell_Data	NONE-NoTFA	Tchourine_2018	ALL	0.75	28668	46	0.0332924	9171	76
Figure_5b			Log2		STL	Single_Cell_Data	NONE-NoTFA	Tchourine_2018	ALL	0.75	28668	47	0.0258307	9089	0
Figure_5b			Log2		STL	Single_Cell_Data	NONE-NoTFA	Tchourine_2018	ALL	0.75	28668	48	0.0256967	9087	0
Figure_5b			Log2		STL	Single_Cell_Data	NONE-NoTFA	Tchourine_2018	ALL	0.75	28668	49	0.0268033	9052	0
Figure_5b			Log2		STL	Single_Cell_Data	NONE-NoTFA	Tchourine_2018	ALL	0.75	28668	50	0.0300664	9185	41
Figure_5b			Log2		STL	Single_Cell_Data	NONE-NoTFA	Tchourine_2018	ALL	0.75	28668	51	0.0277005	9211	0
Figure_5b			Log2		STL	Single_Cell_Data	NONE-NoTFA	Tchourine_2018	ALL	1	38225	42	0.0290959	9761	0
Figure_5b			Log2		STL	Single_Cell_Data	NONE-NoTFA	Tchourine_2018	ALL	1	38225	43	0.0216942	9758	0
Figure_5b			Log2		STL	Single_Cell_Data	NONE-NoTFA	Tchourine_2018	ALL	1	38225	44	0.0260891	9758	0
Figure_5b			Log2		STL	Single_Cell_Data	NONE-NoTFA	Tchourine_2018	ALL	1	38225	45	0.0298845	9758	0
Figure_5b			Log2		STL	Single_Cell_Data	NONE-NoTFA	Tchourine_2018	ALL	1	38225	46	0.035064	9703	78
Figure_5b			Log2		STL	Single_Cell_Data	NONE-NoTFA	Tchourine_2018	ALL	1	38225	47	0.0266322	9833	0
Figure_5b			Log2		STL	Single_Cell_Data	NONE-NoTFA	Tchourine_2018	ALL	1	38225	48	0.0247718	9699	0
Figure_5b			Log2		STL	Single_Cell_Data	NONE-NoTFA	Tchourine_2018	ALL	1	38225	49	0.0265773	9666	0
Figure_5b			Log2		STL	Single_Cell_Data	NONE-NoTFA	Tchourine_2018	ALL	1	38225	50	0.0289161	9765	40
Figure_5b			Log2		STL	Single_Cell_Data	NONE-NoTFA	Tchourine_2018	ALL	1	38225	51	0.0271823	9676	0
Figure_5b			Log2		STL	Single_Cell_Data		Tchourine_2018	ALL	0.01	382	42	0.135244	869	699
Figure_5b			Log2		STL	Single_Cell_Data		Tchourine_2018	ALL	0.01	382	43	0.147225	984	936
Figure_5b			Log2		STL	Single_Cell_Data		Tchourine_2018	ALL	0.01	382	44	0.16494	938	1131
Figure_5b			Log2		STL	Single_Cell_Data		Tchourine_2018	ALL	0.01	382	45	0.13959	887	984
Figure_5b			Log2		STL	Single_Cell_Data		Tchourine_2018	ALL	0.01	382	46	0.143503	801	839
Figure_5b			Log2		STL	Single_Cell_Data		Tchourine_2018	ALL	0.01	382	47	0.171677	993	1137
Figure_5b			Log2		STL	Single_Cell_Data		Tchourine_2018	ALL	0.01	382	48	0.1714	1004	1145
Figure_5b			Log2		STL	Single_Cell_Data		Tchourine_2018	ALL	0.01	382	49	0.121935	910	572
Figure_5b			Log2		STL	Single_Cell_Data		Tchourine_2018	ALL	0.01	382	50	0.133458	989	651
Figure_5b			Log2		STL	Single_Cell_Data		Tchourine_2018	ALL	0.01	382	51	0.166325	975	1025
Figure_5b			Log2		STL	Single_Cell_Data		Tchourine_2018	ALL	0.025	955	42	0.164552	1704	950
Figure_5b			Log2		STL	Single_Cell_Data		Tchourine_2018	ALL	0.025	955	43	0.167687	1805	1029
Figure_5b			Log2		STL	Single_Cell_Data		Tchourine_2018	ALL	0.025	955	44	0.191129	1834	1118
Figure_5b			Log2		STL	Single_Cell_Data		Tchourine_2018	ALL	0.025	955	45	0.151265	1740	884
Figure_5b			Log2		STL	Single_Cell_Data		Tchourine_2018	ALL	0.025	955	46	0.177283	1624	1135
Figure_5b			Log2		STL	Single_Cell_Data		Tchourine_2018	ALL	0.025	955	47	0.191751	1838	1077
Figure_5b			Log2		STL	Single_Cell_Data		Tchourine_2018	ALL	0.025	955	48	0.192306	1808	1033
Figure_5b			Log2		STL	Single_Cell_Data		Tchourine_2018	ALL	0.025	955	49	0.149439	1755	614
Figure_5b			Log2		STL	Single_Cell_Data		Tchourine_2018	ALL	0.025	955	50	0.150072	1815	782
Figure_5b			Log2		STL	Single_Cell_Data		Tchourine_2018	ALL	0.025	955	51	0.184468	1820	947
Figure_5b			Log2		STL	Single_Cell_Data		Tchourine_2018	ALL	0.05	1911	42	0.177382	2754	902
Figure_5b			Log2		STL	Single_Cell_Data		Tchourine_2018	ALL	0.05	1911	43	0.177525	2755	951
Figure_5b			Log2		STL	Single_Cell_Data		Tchourine_2018	ALL	0.05	1911	44	0.208469	2820	1361
Figure_5b			Log2		STL	Single_Cell_Data		Tchourine_2018	ALL	0.05	1911	45	0.166273	2859	968
Figure_5b			Log2		STL	Single_Cell_Data		Tchourine_2018	ALL	0.05	1911	46	0.184841	2716	1023
Figure_5b			Log2		STL	Single_Cell_Data		Tchourine_2018	ALL	0.05	1911	47	0.204394	3049	1095
Figure_5b			Log2		STL	Single_Cell_Data		Tchourine_2018	ALL	0.05	1911	48	0.200329	2865	1141
Figure_5b			Log2		STL	Single_Cell_Data		Tchourine_2018	ALL	0.05	1911	49	0.160688	2952	752
Figure_5b			Log2		STL	Single_Cell_Data		Tchourine_2018	ALL	0.05	1911	50	0.167551	2917	791
Figure_5b			Log2		STL	Single_Cell_Data		Tchourine_2018	ALL	0.05	1911	51	0.197547	2844	1238
Figure_5b			Log2		STL	Single_Cell_Data		Tchourine_2018	ALL	0.1	3822	42	0.18983	4733	990
Figure_5b			Log2		STL	Single_Cell_Data		Tchourine_2018	ALL	0.1	3822	43	0.186491	4513	945
Figure_5b			Log2		STL	Single_Cell_Data		Tchourine_2018	ALL	0.1	3822	44	0.214655	4318	1427
Figure_5b			Log2		STL	Single_Cell_Data		Tchourine_2018	ALL	0.1	3822	45	0.170052	4604	974
Figure_5b			Log2		STL	Single_Cell_Data		Tchourine_2018	ALL	0.1	3822	46	0.195333	4325	1177
Figure_5b			Log2		STL	Single_Cell_Data		Tchourine_2018	ALL	0.1	3822	47	0.2082	4705	1096
Figure_5b			Log2		STL	Single_Cell_Data		Tchourine_2018	ALL	0.1	3822	48	0.207653	4487	1198
Figure_5b			Log2		STL	Single_Cell_Data		Tchourine_2018	ALL	0.1	3822	49	0.175188	4875	802
Figure_5b			Log2		STL	Single_Cell_Data		Tchourine_2018	ALL	0.1	3822	50	0.176323	4642	878
Figure_5b			Log2		STL	Single_Cell_Data		Tchourine_2018	ALL	0.1	3822	51	0.206785	4496	1088
Figure_5b			Log2		STL	Single_Cell_Data		Tchourine_2018	ALL	0.25	9556	42	0.197684	7819	971
Figure_5b			Log2		STL	Single_Cell_Data		Tchourine_2018	ALL	0.25	9556	43	0.194969	7592	1024
Figure_5b			Log2		STL	Single_Cell_Data		Tchourine_2018	ALL	0.25	9556	44	0.214448	7667	1270
Figure_5b			Log2		STL	Single_Cell_Data		Tchourine_2018	ALL	0.25	9556	45	0.173956	8053	886
Figure_5b			Log2		STL	Single_Cell_Data		Tchourine_2018	ALL	0.25	9556	46	0.201479	7580	1032
Figure_5b			Log2		STL	Single_Cell_Data		Tchourine_2018	ALL	0.25	9556	47	0.202726	8252	965
Figure_5b			Log2		STL	Single_Cell_Data		Tchourine_2018	ALL	0.25	9556	48	0.209667	7765	1051
Figure_5b			Log2		STL	Single_Cell_Data		Tchourine_2018	ALL	0.25	9556	49	0.182252	8203	840
Figure_5b			Log2		STL	Single_Cell_Data		Tchourine_2018	ALL	0.25	9556	50	0.180583	7972	843
Figure_5b			Log2		STL	Single_Cell_Data		Tchourine_2018	ALL	0.25	9556	51	0.211341	7735	1059
Figure_5b			Log2		STL	Single_Cell_Data		Tchourine_2018	ALL	0.5	19112	42	0.203457	9932	1026
Figure_5b			Log2		STL	Single_Cell_Data		Tchourine_2018	ALL	0.5	19112	43	0.200425	9785	975
Figure_5b			Log2		STL	Single_Cell_Data		Tchourine_2018	ALL	0.5	19112	44	0.220378	9638	1304
Figure_5b			Log2		STL	Single_Cell_Data		Tchourine_2018	ALL	0.5	19112	45	0.176937	9999	887
Figure_5b			Log2		STL	Single_Cell_Data		Tchourine_2018	ALL	0.5	19112	46	0.205118	9626	1029
Figure_5b			Log2		STL	Single_Cell_Data		Tchourine_2018	ALL	0.5	19112	47	0.208122	10251	908
Figure_5b			Log2		STL	Single_Cell_Data		Tchourine_2018	ALL	0.5	19112	48	0.210597	9976	1160
Figure_5b			Log2		STL	Single_Cell_Data		Tchourine_2018	ALL	0.5	19112	49	0.178235	10147	838
Figure_5b			Log2		STL	Single_Cell_Data		Tchourine_2018	ALL	0.5	19112	50	0.182261	9938	771
Figure_5b			Log2		STL	Single_Cell_Data		Tchourine_2018	ALL	0.5	19112	51	0.2069	9780	956
Figure_5b			Log2		STL	Single_Cell_Data		Tchourine_2018	ALL	0.75	28668	42	0.202209	10852	982
Figure_5b			Log2		STL	Single_Cell_Data		Tchourine_2018	ALL	0.75	28668	43	0.200173	10591	1005
Figure_5b			Log2		STL	Single_Cell_Data		Tchourine_2018	ALL	0.75	28668	44	0.217325	10484	1227
Figure_5b			Log2		STL	Single_Cell_Data		Tchourine_2018	ALL	0.75	28668	45	0.175558	10770	845
Figure_5b			Log2		STL	Single_Cell_Data		Tchourine_2018	ALL	0.75	28668	46	0.203752	10456	1069
Figure_5b			Log2		STL	Single_Cell_Data		Tchourine_2018	ALL	0.75	28668	47	0.209427	11076	925
Figure_5b			Log2		STL	Single_Cell_Data		Tchourine_2018	ALL	0.75	28668	48	0.212774	10725	1149
Figure_5b			Log2		STL	Single_Cell_Data		Tchourine_2018	ALL	0.75	28668	49	0.179388	10879	789
Figure_5b			Log2		STL	Single_Cell_Data		Tchourine_2018	ALL	0.75	28668	50	0.178063	11041	763
Figure_5b			Log2		STL	Single_Cell_Data		Tchourine_2018	ALL	0.75	28668	51	0.208834	10766	957
Figure_5b			Log2		STL	Single_Cell_Data		Tchourine_2018	ALL	1	38225	42	0.201302	11346	1036
Figure_5b			Log2		STL	Single_Cell_Data		Tchourine_2018	ALL	1	38225	43	0.201027	11161	980
Figure_5b			Log2		STL	Single_Cell_Data		Tchourine_2018	ALL	1	38225	44	0.229105	10973	1240
Figure_5b			Log2		STL	Single_Cell_Data		Tchourine_2018	ALL	1	38225	45	0.172588	11215	794
Figure_5b			Log2		STL	Single_Cell_Data		Tchourine_2018	ALL	1	38225	46	0.20479	11031	1037
Figure_5b			Log2		STL	Single_Cell_Data		Tchourine_2018	ALL	1	38225	47	0.205499	11520	952
Figure_5b			Log2		STL	Single_Cell_Data		Tchourine_2018	ALL	1	38225	48	0.211652	11182	1104
Figure_5b			Log2		STL	Single_Cell_Data		Tchourine_2018	ALL	1	38225	49	0.177547	11382	804
Figure_5b			Log2		STL	Single_Cell_Data		Tchourine_2018	ALL	1	38225	50	0.17831	11455	688
Figure_5b			Log2		STL	Single_Cell_Data		Tchourine_2018	ALL	1	38225	51	0.209175	11190	950
Figure_5b			Log2		STL	Single_Cell_Data	YEASTRACT	Tchourine_2018	ALL	0.01	382	42	0.119067	999	1039
Figure_5b			Log2		STL	Single_Cell_Data	YEASTRACT	Tchourine_2018	ALL	0.01	382	43	0.117623	1075	782
Figure_5b			Log2		STL	Single_Cell_Data	YEASTRACT	Tchourine_2018	ALL	0.01	382	44	0.167436	1056	1507
Figure_5b			Log2		STL	Single_Cell_Data	YEASTRACT	Tchourine_2018	ALL	0.01	382	45	0.144065	1014	1281
Figure_5b			Log2		STL	Single_Cell_Data	YEASTRACT	Tchourine_2018	ALL	0.01	382	46	0.141781	929	1211
Figure_5b			Log2		STL	Single_Cell_Data	YEASTRACT	Tchourine_2018	ALL	0.01	382	47	0.121202	1032	1165
Figure_5b			Log2		STL	Single_Cell_Data	YEASTRACT	Tchourine_2018	ALL	0.01	382	48	0.158409	1050	1484
Figure_5b			Log2		STL	Single_Cell_Data	YEASTRACT	Tchourine_2018	ALL	0.01	382	49	0.128631	1015	859
Figure_5b			Log2		STL	Single_Cell_Data	YEASTRACT	Tchourine_2018	ALL	0.01	382	50	0.131012	1043	1170
Figure_5b			Log2		STL	Single_Cell_Data	YEASTRACT	Tchourine_2018	ALL	0.01	382	51	0.141553	1099	1333
Figure_5b			Log2		STL	Single_Cell_Data	YEASTRACT	Tchourine_2018	ALL	0.025	955	42	0.16071	1948	1231
Figure_5b			Log2		STL	Single_Cell_Data	YEASTRACT	Tchourine_2018	ALL	0.025	955	43	0.133828	2117	1015
Figure_5b			Log2		STL	Single_Cell_Data	YEASTRACT	Tchourine_2018	ALL	0.025	955	44	0.18585	2087	1584
Figure_5b			Log2		STL	Single_Cell_Data	YEASTRACT	Tchourine_2018	ALL	0.025	955	45	0.166136	1956	1683
Figure_5b			Log2		STL	Single_Cell_Data	YEASTRACT	Tchourine_2018	ALL	0.025	955	46	0.169318	1887	1295
Figure_5b			Log2		STL	Single_Cell_Data	YEASTRACT	Tchourine_2018	ALL	0.025	955	47	0.159352	1944	1495
Figure_5b			Log2		STL	Single_Cell_Data	YEASTRACT	Tchourine_2018	ALL	0.025	955	48	0.173504	2072	1505
Figure_5b			Log2		STL	Single_Cell_Data	YEASTRACT	Tchourine_2018	ALL	0.025	955	49	0.151514	1937	1049
Figure_5b			Log2		STL	Single_Cell_Data	YEASTRACT	Tchourine_2018	ALL	0.025	955	50	0.145546	1970	1034
Figure_5b			Log2		STL	Single_Cell_Data	YEASTRACT	Tchourine_2018	ALL	0.025	955	51	0.158359	1967	1192
Figure_5b			Log2		STL	Single_Cell_Data	YEASTRACT	Tchourine_2018	ALL	0.05	1911	42	0.16885	3059	1328
Figure_5b			Log2		STL	Single_Cell_Data	YEASTRACT	Tchourine_2018	ALL	0.05	1911	43	0.142569	3180	888
Figure_5b			Log2		STL	Single_Cell_Data	YEASTRACT	Tchourine_2018	ALL	0.05	1911	44	0.205367	3089	1638
Figure_5b			Log2		STL	Single_Cell_Data	YEASTRACT	Tchourine_2018	ALL	0.05	1911	45	0.182173	3148	1356
Figure_5b			Log2		STL	Single_Cell_Data	YEASTRACT	Tchourine_2018	ALL	0.05	1911	46	0.173842	2978	1413
Figure_5b			Log2		STL	Single_Cell_Data	YEASTRACT	Tchourine_2018	ALL	0.05	1911	47	0.163697	3153	1380
Figure_5b			Log2		STL	Single_Cell_Data	YEASTRACT	Tchourine_2018	ALL	0.05	1911	48	0.186256	2900	1443
Figure_5b			Log2		STL	Single_Cell_Data	YEASTRACT	Tchourine_2018	ALL	0.05	1911	49	0.16483	3109	1124
Figure_5b			Log2		STL	Single_Cell_Data	YEASTRACT	Tchourine_2018	ALL	0.05	1911	50	0.157833	3150	1297
Figure_5b			Log2		STL	Single_Cell_Data	YEASTRACT	Tchourine_2018	ALL	0.05	1911	51	0.169895	3177	1398
Figure_5b			Log2		STL	Single_Cell_Data	YEASTRACT	Tchourine_2018	ALL	0.1	3822	42	0.176025	4783	1421
Figure_5b			Log2		STL	Single_Cell_Data	YEASTRACT	Tchourine_2018	ALL	0.1	3822	43	0.15704	4837	1274
Figure_5b			Log2		STL	Single_Cell_Data	YEASTRACT	Tchourine_2018	ALL	0.1	3822	44	0.212774	4694	1915
Figure_5b			Log2		STL	Single_Cell_Data	YEASTRACT	Tchourine_2018	ALL	0.1	3822	45	0.192008	4783	1431
Figure_5b			Log2		STL	Single_Cell_Data	YEASTRACT	Tchourine_2018	ALL	0.1	3822	46	0.186195	4648	1466
Figure_5b			Log2		STL	Single_Cell_Data	YEASTRACT	Tchourine_2018	ALL	0.1	3822	47	0.164169	4582	1185
Figure_5b			Log2		STL	Single_Cell_Data	YEASTRACT	Tchourine_2018	ALL	0.1	3822	48	0.190847	4546	1487
Figure_5b			Log2		STL	Single_Cell_Data	YEASTRACT	Tchourine_2018	ALL	0.1	3822	49	0.169809	4792	1306
Figure_5b			Log2		STL	Single_Cell_Data	YEASTRACT	Tchourine_2018	ALL	0.1	3822	50	0.169403	4747	1214
Figure_5b			Log2		STL	Single_Cell_Data	YEASTRACT	Tchourine_2018	ALL	0.1	3822	51	0.163682	4562	1247
Figure_5b			Log2		STL	Single_Cell_Data	YEASTRACT	Tchourine_2018	ALL	0.25	9556	42	0.179389	7998	1399
Figure_5b			Log2		STL	Single_Cell_Data	YEASTRACT	Tchourine_2018	ALL	0.25	9556	43	0.159678	8120	1244
Figure_5b			Log2		STL	Single_Cell_Data	YEASTRACT	Tchourine_2018	ALL	0.25	9556	44	0.217914	8050	1974
Figure_5b			Log2		STL	Single_Cell_Data	YEASTRACT	Tchourine_2018	ALL	0.25	9556	45	0.191481	8246	1627
Figure_5b			Log2		STL	Single_Cell_Data	YEASTRACT	Tchourine_2018	ALL	0.25	9556	46	0.188072	7974	1426
Figure_5b			Log2		STL	Single_Cell_Data	YEASTRACT	Tchourine_2018	ALL	0.25	9556	47	0.163361	7853	1218
Figure_5b			Log2		STL	Single_Cell_Data	YEASTRACT	Tchourine_2018	ALL	0.25	9556	48	0.195875	8074	1770
Figure_5b			Log2		STL	Single_Cell_Data	YEASTRACT	Tchourine_2018	ALL	0.25	9556	49	0.171026	7950	1269
Figure_5b			Log2		STL	Single_Cell_Data	YEASTRACT	Tchourine_2018	ALL	0.25	9556	50	0.156289	7276	1034
Figure_5b			Log2		STL	Single_Cell_Data	YEASTRACT	Tchourine_2018	ALL	0.25	9556	51	0.162038	7454	1105
Figure_5b			Log2		STL	Single_Cell_Data	YEASTRACT	Tchourine_2018	ALL	0.5	19112	42	0.184195	11238	1430
Figure_5b			Log2		STL	Single_Cell_Data	YEASTRACT	Tchourine_2018	ALL	0.5	19112	43	0.161541	11452	1113
Figure_5b			Log2		STL	Single_Cell_Data	YEASTRACT	Tchourine_2018	ALL	0.5	19112	44	0.218281	11283	1935
Figure_5b			Log2		STL	Single_Cell_Data	YEASTRACT	Tchourine_2018	ALL	0.5	19112	45	0.194246	11559	1585
Figure_5b			Log2		STL	Single_Cell_Data	YEASTRACT	Tchourine_2018	ALL	0.5	19112	46	0.183797	11266	1455
Figure_5b			Log2		STL	Single_Cell_Data	YEASTRACT	Tchourine_2018	ALL	0.5	19112	47	0.160055	10986	1049
Figure_5b			Log2		STL	Single_Cell_Data	YEASTRACT	Tchourine_2018	ALL	0.5	19112	48	0.191535	11532	1522
Figure_5b			Log2		STL	Single_Cell_Data	YEASTRACT	Tchourine_2018	ALL	0.5	19112	49	0.169062	11172	1203
Figure_5b			Log2		STL	Single_Cell_Data	YEASTRACT	Tchourine_2018	ALL	0.5	19112	50	0.163336	11214	1148
Figure_5b			Log2		STL	Single_Cell_Data	YEASTRACT	Tchourine_2018	ALL	0.5	19112	51	0.168732	10995	1361
Figure_5b			Log2		STL	Single_Cell_Data	YEASTRACT	Tchourine_2018	ALL	0.75	28668	42	0.181108	13563	1442
Figure_5b			Log2		STL	Single_Cell_Data	YEASTRACT	Tchourine_2018	ALL	0.75	28668	43	0.160826	13886	1086
Figure_5b			Log2		STL	Single_Cell_Data	YEASTRACT	Tchourine_2018	ALL	0.75	28668	44	0.21435	13431	1975
Figure_5b			Log2		STL	Single_Cell_Data	YEASTRACT	Tchourine_2018	ALL	0.75	28668	45	0.192798	13857	1530
Figure_5b			Log2		STL	Single_Cell_Data	YEASTRACT	Tchourine_2018	ALL	0.75	28668	46	0.185827	13617	1367
Figure_5b			Log2		STL	Single_Cell_Data	YEASTRACT	Tchourine_2018	ALL	0.75	28668	47	0.159369	13234	1115
Figure_5b			Log2		STL	Single_Cell_Data	YEASTRACT	Tchourine_2018	ALL	0.75	28668	48	0.192084	13844	1606
Figure_5b			Log2		STL	Single_Cell_Data	YEASTRACT	Tchourine_2018	ALL	0.75	28668	49	0.171648	13543	1225
Figure_5b			Log2		STL	Single_Cell_Data	YEASTRACT	Tchourine_2018	ALL	0.75	28668	50	0.162672	13359	1163
Figure_5b			Log2		STL	Single_Cell_Data	YEASTRACT	Tchourine_2018	ALL	0.75	28668	51	0.166301	13345	1256
Figure_5b			Log2		STL	Single_Cell_Data	YEASTRACT	Tchourine_2018	ALL	1	38225	42	0.179624	15294	1462
Figure_5b			Log2		STL	Single_Cell_Data	YEASTRACT	Tchourine_2018	ALL	1	38225	43	0.165247	15734	1109
Figure_5b			Log2		STL	Single_Cell_Data	YEASTRACT	Tchourine_2018	ALL	1	38225	44	0.211901	15204	1848
Figure_5b			Log2		STL	Single_Cell_Data	YEASTRACT	Tchourine_2018	ALL	1	38225	45	0.191253	15650	1613
Figure_5b			Log2		STL	Single_Cell_Data	YEASTRACT	Tchourine_2018	ALL	1	38225	46	0.18368	15313	1259
Figure_5b			Log2		STL	Single_Cell_Data	YEASTRACT	Tchourine_2018	ALL	1	38225	47	0.15512	15068	1151
Figure_5b			Log2		STL	Single_Cell_Data	YEASTRACT	Tchourine_2018	ALL	1	38225	48	0.190414	15690	1592
Figure_5b			Log2		STL	Single_Cell_Data	YEASTRACT	Tchourine_2018	ALL	1	38225	49	0.169734	15438	1220
Figure_5b			Log2		STL	Single_Cell_Data	YEASTRACT	Tchourine_2018	ALL	1	38225	50	0.163029	14931	941
Figure_5b			Log2		STL	Single_Cell_Data	YEASTRACT	Tchourine_2018	ALL	1	38225	51	0.167167	15057	1270
Figure_5b			Log2		STL	Single_Cell_Data	ATAC-MOTIF	Tchourine_2018	ALL	0.01	382	42	0.0580871	611	156
Figure_5b			Log2		STL	Single_Cell_Data	ATAC-MOTIF	Tchourine_2018	ALL	0.01	382	43	0.0696726	748	166
Figure_5b			Log2		STL	Single_Cell_Data	ATAC-MOTIF	Tchourine_2018	ALL	0.01	382	44	0.104822	752	499
Figure_5b			Log2		STL	Single_Cell_Data	ATAC-MOTIF	Tchourine_2018	ALL	0.01	382	45	0.0693892	672	175
Figure_5b			Log2		STL	Single_Cell_Data	ATAC-MOTIF	Tchourine_2018	ALL	0.01	382	46	0.0709341	552	598
Figure_5b			Log2		STL	Single_Cell_Data	ATAC-MOTIF	Tchourine_2018	ALL	0.01	382	47	0.0677504	734	178
Figure_5b			Log2		STL	Single_Cell_Data	ATAC-MOTIF	Tchourine_2018	ALL	0.01	382	48	0.0749753	629	12
Figure_5b			Log2		STL	Single_Cell_Data	ATAC-MOTIF	Tchourine_2018	ALL	0.01	382	49	0.068004	625	279
Figure_5b			Log2		STL	Single_Cell_Data	ATAC-MOTIF	Tchourine_2018	ALL	0.01	382	50	0.0620005	670	162
Figure_5b			Log2		STL	Single_Cell_Data	ATAC-MOTIF	Tchourine_2018	ALL	0.01	382	51	0.0693424	667	320
Figure_5b			Log2		STL	Single_Cell_Data	ATAC-MOTIF	Tchourine_2018	ALL	0.025	955	42	0.0718429	1573	234
Figure_5b			Log2		STL	Single_Cell_Data	ATAC-MOTIF	Tchourine_2018	ALL	0.025	955	43	0.0849303	1691	399
Figure_5b			Log2		STL	Single_Cell_Data	ATAC-MOTIF	Tchourine_2018	ALL	0.025	955	44	0.123772	1721	674
Figure_5b			Log2		STL	Single_Cell_Data	ATAC-MOTIF	Tchourine_2018	ALL	0.025	955	45	0.0778474	1459	119
Figure_5b			Log2		STL	Single_Cell_Data	ATAC-MOTIF	Tchourine_2018	ALL	0.025	955	46	0.0971474	1420	484
Figure_5b			Log2		STL	Single_Cell_Data	ATAC-MOTIF	Tchourine_2018	ALL	0.025	955	47	0.0874414	1666	280
Figure_5b			Log2		STL	Single_Cell_Data	ATAC-MOTIF	Tchourine_2018	ALL	0.025	955	48	0.0823621	1502	43
Figure_5b			Log2		STL	Single_Cell_Data	ATAC-MOTIF	Tchourine_2018	ALL	0.025	955	49	0.0804645	1491	376
Figure_5b			Log2		STL	Single_Cell_Data	ATAC-MOTIF	Tchourine_2018	ALL	0.025	955	50	0.0845947	1582	198
Figure_5b			Log2		STL	Single_Cell_Data	ATAC-MOTIF	Tchourine_2018	ALL	0.025	955	51	0.0821675	1544	305
Figure_5b			Log2		STL	Single_Cell_Data	ATAC-MOTIF	Tchourine_2018	ALL	0.05	1911	42	0.0731947	2709	425
Figure_5b			Log2		STL	Single_Cell_Data	ATAC-MOTIF	Tchourine_2018	ALL	0.05	1911	43	0.0902499	2861	264
Figure_5b			Log2		STL	Single_Cell_Data	ATAC-MOTIF	Tchourine_2018	ALL	0.05	1911	44	0.14181	2848	776
Figure_5b			Log2		STL	Single_Cell_Data	ATAC-MOTIF	Tchourine_2018	ALL	0.05	1911	45	0.0788387	2732	65
Figure_5b			Log2		STL	Single_Cell_Data	ATAC-MOTIF	Tchourine_2018	ALL	0.05	1911	46	0.10698	2753	493
Figure_5b			Log2		STL	Single_Cell_Data	ATAC-MOTIF	Tchourine_2018	ALL	0.05	1911	47	0.0945785	3070	364
Figure_5b			Log2		STL	Single_Cell_Data	ATAC-MOTIF	Tchourine_2018	ALL	0.05	1911	48	0.0868128	2861	82
Figure_5b			Log2		STL	Single_Cell_Data	ATAC-MOTIF	Tchourine_2018	ALL	0.05	1911	49	0.0888185	2789	273
Figure_5b			Log2		STL	Single_Cell_Data	ATAC-MOTIF	Tchourine_2018	ALL	0.05	1911	50	0.091091	2805	178
Figure_5b			Log2		STL	Single_Cell_Data	ATAC-MOTIF	Tchourine_2018	ALL	0.05	1911	51	0.0835549	2817	257
Figure_5b			Log2		STL	Single_Cell_Data	ATAC-MOTIF	Tchourine_2018	ALL	0.1	3822	42	0.0761482	4810	320
Figure_5b			Log2		STL	Single_Cell_Data	ATAC-MOTIF	Tchourine_2018	ALL	0.1	3822	43	0.0993379	4997	613
Figure_5b			Log2		STL	Single_Cell_Data	ATAC-MOTIF	Tchourine_2018	ALL	0.1	3822	44	0.135483	4683	544
Figure_5b			Log2		STL	Single_Cell_Data	ATAC-MOTIF	Tchourine_2018	ALL	0.1	3822	45	0.085992	4720	105
Figure_5b			Log2		STL	Single_Cell_Data	ATAC-MOTIF	Tchourine_2018	ALL	0.1	3822	46	0.116691	4815	546
Figure_5b			Log2		STL	Single_Cell_Data	ATAC-MOTIF	Tchourine_2018	ALL	0.1	3822	47	0.101471	4952	314
Figure_5b			Log2		STL	Single_Cell_Data	ATAC-MOTIF	Tchourine_2018	ALL	0.1	3822	48	0.0850254	4895	71
Figure_5b			Log2		STL	Single_Cell_Data	ATAC-MOTIF	Tchourine_2018	ALL	0.1	3822	49	0.0874068	4845	233
Figure_5b			Log2		STL	Single_Cell_Data	ATAC-MOTIF	Tchourine_2018	ALL	0.1	3822	50	0.0946781	4890	237
Figure_5b			Log2		STL	Single_Cell_Data	ATAC-MOTIF	Tchourine_2018	ALL	0.1	3822	51	0.0886338	4936	336
Figure_5b			Log2		STL	Single_Cell_Data	ATAC-MOTIF	Tchourine_2018	ALL	0.25	9556	42	0.081344	8783	318
Figure_5b			Log2		STL	Single_Cell_Data	ATAC-MOTIF	Tchourine_2018	ALL	0.25	9556	43	0.103725	8954	335
Figure_5b			Log2		STL	Single_Cell_Data	ATAC-MOTIF	Tchourine_2018	ALL	0.25	9556	44	0.136673	8883	523
Figure_5b			Log2		STL	Single_Cell_Data	ATAC-MOTIF	Tchourine_2018	ALL	0.25	9556	45	0.0891273	8722	195
Figure_5b			Log2		STL	Single_Cell_Data	ATAC-MOTIF	Tchourine_2018	ALL	0.25	9556	46	0.11309	8949	552
Figure_5b			Log2		STL	Single_Cell_Data	ATAC-MOTIF	Tchourine_2018	ALL	0.25	9556	47	0.101954	9098	321
Figure_5b			Log2		STL	Single_Cell_Data	ATAC-MOTIF	Tchourine_2018	ALL	0.25	9556	48	0.0943509	8931	0
Figure_5b			Log2		STL	Single_Cell_Data	ATAC-MOTIF	Tchourine_2018	ALL	0.25	9556	49	0.0874854	8675	217
Figure_5b			Log2		STL	Single_Cell_Data	ATAC-MOTIF	Tchourine_2018	ALL	0.25	9556	50	0.0985909	8914	318
Figure_5b			Log2		STL	Single_Cell_Data	ATAC-MOTIF	Tchourine_2018	ALL	0.25	9556	51	0.0910103	8782	274
Figure_5b			Log2		STL	Single_Cell_Data	ATAC-MOTIF	Tchourine_2018	ALL	0.5	19112	42	0.0803215	12473	357
Figure_5b			Log2		STL	Single_Cell_Data	ATAC-MOTIF	Tchourine_2018	ALL	0.5	19112	43	0.104159	12698	315
Figure_5b			Log2		STL	Single_Cell_Data	ATAC-MOTIF	Tchourine_2018	ALL	0.5	19112	44	0.132335	12704	411
Figure_5b			Log2		STL	Single_Cell_Data	ATAC-MOTIF	Tchourine_2018	ALL	0.5	19112	45	0.0860104	12489	206
Figure_5b			Log2		STL	Single_Cell_Data	ATAC-MOTIF	Tchourine_2018	ALL	0.5	19112	46	0.115652	12784	429
Figure_5b			Log2		STL	Single_Cell_Data	ATAC-MOTIF	Tchourine_2018	ALL	0.5	19112	47	0.100841	12835	236
Figure_5b			Log2		STL	Single_Cell_Data	ATAC-MOTIF	Tchourine_2018	ALL	0.5	19112	48	0.092381	12653	0
Figure_5b			Log2		STL	Single_Cell_Data	ATAC-MOTIF	Tchourine_2018	ALL	0.5	19112	49	0.0923889	12477	248
Figure_5b			Log2		STL	Single_Cell_Data	ATAC-MOTIF	Tchourine_2018	ALL	0.5	19112	50	0.096009	12786	303
Figure_5b			Log2		STL	Single_Cell_Data	ATAC-MOTIF	Tchourine_2018	ALL	0.5	19112	51	0.0910473	12607	253
Figure_5b			Log2		STL	Single_Cell_Data	ATAC-MOTIF	Tchourine_2018	ALL	0.75	28668	42	0.0828667	14521	351
Figure_5b			Log2		STL	Single_Cell_Data	ATAC-MOTIF	Tchourine_2018	ALL	0.75	28668	43	0.101686	14721	338
Figure_5b			Log2		STL	Single_Cell_Data	ATAC-MOTIF	Tchourine_2018	ALL	0.75	28668	44	0.131791	14592	399
Figure_5b			Log2		STL	Single_Cell_Data	ATAC-MOTIF	Tchourine_2018	ALL	0.75	28668	45	0.0865385	14405	221
Figure_5b			Log2		STL	Single_Cell_Data	ATAC-MOTIF	Tchourine_2018	ALL	0.75	28668	46	0.115155	14676	480
Figure_5b			Log2		STL	Single_Cell_Data	ATAC-MOTIF	Tchourine_2018	ALL	0.75	28668	47	0.100929	14800	248
Figure_5b			Log2		STL	Single_Cell_Data	ATAC-MOTIF	Tchourine_2018	ALL	0.75	28668	48	0.0904756	14718	0
Figure_5b			Log2		STL	Single_Cell_Data	ATAC-MOTIF	Tchourine_2018	ALL	0.75	28668	49	0.0911375	14608	201
Figure_5b			Log2		STL	Single_Cell_Data	ATAC-MOTIF	Tchourine_2018	ALL	0.75	28668	50	0.0967265	14693	317
Figure_5b			Log2		STL	Single_Cell_Data	ATAC-MOTIF	Tchourine_2018	ALL	0.75	28668	51	0.0911399	14476	259
Figure_5b			Log2		STL	Single_Cell_Data	ATAC-MOTIF	Tchourine_2018	ALL	1	38225	42	0.0829292	15595	352
Figure_5b			Log2		STL	Single_Cell_Data	ATAC-MOTIF	Tchourine_2018	ALL	1	38225	43	0.100267	15786	348
Figure_5b			Log2		STL	Single_Cell_Data	ATAC-MOTIF	Tchourine_2018	ALL	1	38225	44	0.132125	15606	365
Figure_5b			Log2		STL	Single_Cell_Data	ATAC-MOTIF	Tchourine_2018	ALL	1	38225	45	0.0860062	15551	192
Figure_5b			Log2		STL	Single_Cell_Data	ATAC-MOTIF	Tchourine_2018	ALL	1	38225	46	0.116097	15708	513
Figure_5b			Log2		STL	Single_Cell_Data	ATAC-MOTIF	Tchourine_2018	ALL	1	38225	47	0.09779	15961	213
Figure_5b			Log2		STL	Single_Cell_Data	ATAC-MOTIF	Tchourine_2018	ALL	1	38225	48	0.0899171	15816	0
Figure_5b			Log2		STL	Single_Cell_Data	ATAC-MOTIF	Tchourine_2018	ALL	1	38225	49	0.092512	15618	179
Figure_5b			Log2		STL	Single_Cell_Data	ATAC-MOTIF	Tchourine_2018	ALL	1	38225	50	0.095903	15774	338
Figure_5b			Log2		STL	Single_Cell_Data	ATAC-MOTIF	Tchourine_2018	ALL	1	38225	51	0.0924248	15739	270
Figure_5b			Log2		STL	Single_Cell_Data	BUSSEMAKER	Tchourine_2018	ALL	0.01	382	42	0.0465341	819	0
Figure_5b			Log2		STL	Single_Cell_Data	BUSSEMAKER	Tchourine_2018	ALL	0.01	382	43	0.0686633	870	20
Figure_5b			Log2		STL	Single_Cell_Data	BUSSEMAKER	Tchourine_2018	ALL	0.01	382	44	0.0815125	971	0
Figure_5b			Log2		STL	Single_Cell_Data	BUSSEMAKER	Tchourine_2018	ALL	0.01	382	45	0.0600732	722	0
Figure_5b			Log2		STL	Single_Cell_Data	BUSSEMAKER	Tchourine_2018	ALL	0.01	382	46	0.0889844	764	287
Figure_5b			Log2		STL	Single_Cell_Data	BUSSEMAKER	Tchourine_2018	ALL	0.01	382	47	0.0591018	841	0
Figure_5b			Log2		STL	Single_Cell_Data	BUSSEMAKER	Tchourine_2018	ALL	0.01	382	48	0.0901532	803	298
Figure_5b			Log2		STL	Single_Cell_Data	BUSSEMAKER	Tchourine_2018	ALL	0.01	382	49	0.0609517	796	0
Figure_5b			Log2		STL	Single_Cell_Data	BUSSEMAKER	Tchourine_2018	ALL	0.01	382	50	0.0866057	862	281
Figure_5b			Log2		STL	Single_Cell_Data	BUSSEMAKER	Tchourine_2018	ALL	0.01	382	51	0.0682971	838	64
Figure_5b			Log2		STL	Single_Cell_Data	BUSSEMAKER	Tchourine_2018	ALL	0.025	955	42	0.0693204	1732	0
Figure_5b			Log2		STL	Single_Cell_Data	BUSSEMAKER	Tchourine_2018	ALL	0.025	955	43	0.0847495	1884	233
Figure_5b			Log2		STL	Single_Cell_Data	BUSSEMAKER	Tchourine_2018	ALL	0.025	955	44	0.101642	1851	394
Figure_5b			Log2		STL	Single_Cell_Data	BUSSEMAKER	Tchourine_2018	ALL	0.025	955	45	0.0697525	1605	0
Figure_5b			Log2		STL	Single_Cell_Data	BUSSEMAKER	Tchourine_2018	ALL	0.025	955	46	0.0971318	1622	290
Figure_5b			Log2		STL	Single_Cell_Data	BUSSEMAKER	Tchourine_2018	ALL	0.025	955	47	0.0870779	1803	222
Figure_5b			Log2		STL	Single_Cell_Data	BUSSEMAKER	Tchourine_2018	ALL	0.025	955	48	0.106777	1705	312
Figure_5b			Log2		STL	Single_Cell_Data	BUSSEMAKER	Tchourine_2018	ALL	0.025	955	49	0.086778	1729	0
Figure_5b			Log2		STL	Single_Cell_Data	BUSSEMAKER	Tchourine_2018	ALL	0.025	955	50	0.0933225	1753	273
Figure_5b			Log2		STL	Single_Cell_Data	BUSSEMAKER	Tchourine_2018	ALL	0.025	955	51	0.0900767	1703	351
Figure_5b			Log2		STL	Single_Cell_Data	BUSSEMAKER	Tchourine_2018	ALL	0.05	1911	42	0.0740446	2892	38
Figure_5b			Log2		STL	Single_Cell_Data	BUSSEMAKER	Tchourine_2018	ALL	0.05	1911	43	0.102925	2932	446
Figure_5b			Log2		STL	Single_Cell_Data	BUSSEMAKER	Tchourine_2018	ALL	0.05	1911	44	0.112823	2967	474
Figure_5b			Log2		STL	Single_Cell_Data	BUSSEMAKER	Tchourine_2018	ALL	0.05	1911	45	0.0929451	2901	250
Figure_5b			Log2		STL	Single_Cell_Data	BUSSEMAKER	Tchourine_2018	ALL	0.05	1911	46	0.108674	2784	341
Figure_5b			Log2		STL	Single_Cell_Data	BUSSEMAKER	Tchourine_2018	ALL	0.05	1911	47	0.0907466	3100	158
Figure_5b			Log2		STL	Single_Cell_Data	BUSSEMAKER	Tchourine_2018	ALL	0.05	1911	48	0.118693	2865	366
Figure_5b			Log2		STL	Single_Cell_Data	BUSSEMAKER	Tchourine_2018	ALL	0.05	1911	49	0.104274	2954	335
Figure_5b			Log2		STL	Single_Cell_Data	BUSSEMAKER	Tchourine_2018	ALL	0.05	1911	50	0.0965972	2871	260
Figure_5b			Log2		STL	Single_Cell_Data	BUSSEMAKER	Tchourine_2018	ALL	0.05	1911	51	0.0896112	2896	367
Figure_5b			Log2		STL	Single_Cell_Data	BUSSEMAKER	Tchourine_2018	ALL	0.1	3822	42	0.0746654	4950	0
Figure_5b			Log2		STL	Single_Cell_Data	BUSSEMAKER	Tchourine_2018	ALL	0.1	3822	43	0.110374	4831	497
Figure_5b			Log2		STL	Single_Cell_Data	BUSSEMAKER	Tchourine_2018	ALL	0.1	3822	44	0.123512	4680	523
Figure_5b			Log2		STL	Single_Cell_Data	BUSSEMAKER	Tchourine_2018	ALL	0.1	3822	45	0.097676	4734	206
Figure_5b			Log2		STL	Single_Cell_Data	BUSSEMAKER	Tchourine_2018	ALL	0.1	3822	46	0.114406	4585	324
Figure_5b			Log2		STL	Single_Cell_Data	BUSSEMAKER	Tchourine_2018	ALL	0.1	3822	47	0.0899641	4832	132
Figure_5b			Log2		STL	Single_Cell_Data	BUSSEMAKER	Tchourine_2018	ALL	0.1	3822	48	0.115275	4675	318
Figure_5b			Log2		STL	Single_Cell_Data	BUSSEMAKER	Tchourine_2018	ALL	0.1	3822	49	0.106017	5179	331
Figure_5b			Log2		STL	Single_Cell_Data	BUSSEMAKER	Tchourine_2018	ALL	0.1	3822	50	0.102283	4740	278
Figure_5b			Log2		STL	Single_Cell_Data	BUSSEMAKER	Tchourine_2018	ALL	0.1	3822	51	0.0854099	5005	330
Figure_5b			Log2		STL	Single_Cell_Data	BUSSEMAKER	Tchourine_2018	ALL	0.25	9556	42	0.0788118	8912	341
Figure_5b			Log2		STL	Single_Cell_Data	BUSSEMAKER	Tchourine_2018	ALL	0.25	9556	43	0.114543	8581	464
Figure_5b			Log2		STL	Single_Cell_Data	BUSSEMAKER	Tchourine_2018	ALL	0.25	9556	44	0.118185	8601	529
Figure_5b			Log2		STL	Single_Cell_Data	BUSSEMAKER	Tchourine_2018	ALL	0.25	9556	45	0.103721	8750	315
Figure_5b			Log2		STL	Single_Cell_Data	BUSSEMAKER	Tchourine_2018	ALL	0.25	9556	46	0.112912	8401	374
Figure_5b			Log2		STL	Single_Cell_Data	BUSSEMAKER	Tchourine_2018	ALL	0.25	9556	47	0.094917	8569	239
Figure_5b			Log2		STL	Single_Cell_Data	BUSSEMAKER	Tchourine_2018	ALL	0.25	9556	48	0.115355	8480	358
Figure_5b			Log2		STL	Single_Cell_Data	BUSSEMAKER	Tchourine_2018	ALL	0.25	9556	49	0.10366	8836	344
Figure_5b			Log2		STL	Single_Cell_Data	BUSSEMAKER	Tchourine_2018	ALL	0.25	9556	50	0.100642	8496	284
Figure_5b			Log2		STL	Single_Cell_Data	BUSSEMAKER	Tchourine_2018	ALL	0.25	9556	51	0.0821976	8797	281
Figure_5b			Log2		STL	Single_Cell_Data	BUSSEMAKER	Tchourine_2018	ALL	0.5	19112	42	0.0761265	11557	338
Figure_5b			Log2		STL	Single_Cell_Data	BUSSEMAKER	Tchourine_2018	ALL	0.5	19112	43	0.117489	11363	438
Figure_5b			Log2		STL	Single_Cell_Data	BUSSEMAKER	Tchourine_2018	ALL	0.5	19112	44	0.115094	11309	522
Figure_5b			Log2		STL	Single_Cell_Data	BUSSEMAKER	Tchourine_2018	ALL	0.5	19112	45	0.0934232	11512	236
Figure_5b			Log2		STL	Single_Cell_Data	BUSSEMAKER	Tchourine_2018	ALL	0.5	19112	46	0.107528	11213	324
Figure_5b			Log2		STL	Single_Cell_Data	BUSSEMAKER	Tchourine_2018	ALL	0.5	19112	47	0.0921392	11191	234
Figure_5b			Log2		STL	Single_Cell_Data	BUSSEMAKER	Tchourine_2018	ALL	0.5	19112	48	0.113954	11303	362
Figure_5b			Log2		STL	Single_Cell_Data	BUSSEMAKER	Tchourine_2018	ALL	0.5	19112	49	0.103783	11392	351
Figure_5b			Log2		STL	Single_Cell_Data	BUSSEMAKER	Tchourine_2018	ALL	0.5	19112	50	0.0985643	11277	271
Figure_5b			Log2		STL	Single_Cell_Data	BUSSEMAKER	Tchourine_2018	ALL	0.5	19112	51	0.0809442	11520	275
Figure_5b			Log2		STL	Single_Cell_Data	BUSSEMAKER	Tchourine_2018	ALL	0.75	28668	42	0.0772108	12540	327
Figure_5b			Log2		STL	Single_Cell_Data	BUSSEMAKER	Tchourine_2018	ALL	0.75	28668	43	0.118702	12505	486
Figure_5b			Log2		STL	Single_Cell_Data	BUSSEMAKER	Tchourine_2018	ALL	0.75	28668	44	0.110124	12393	487
Figure_5b			Log2		STL	Single_Cell_Data	BUSSEMAKER	Tchourine_2018	ALL	0.75	28668	45	0.0923578	12608	243
Figure_5b			Log2		STL	Single_Cell_Data	BUSSEMAKER	Tchourine_2018	ALL	0.75	28668	46	0.10615	12399	337
Figure_5b			Log2		STL	Single_Cell_Data	BUSSEMAKER	Tchourine_2018	ALL	0.75	28668	47	0.0952249	12279	265
Figure_5b			Log2		STL	Single_Cell_Data	BUSSEMAKER	Tchourine_2018	ALL	0.75	28668	48	0.116889	12396	369
Figure_5b			Log2		STL	Single_Cell_Data	BUSSEMAKER	Tchourine_2018	ALL	0.75	28668	49	0.100254	12522	336
Figure_5b			Log2		STL	Single_Cell_Data	BUSSEMAKER	Tchourine_2018	ALL	0.75	28668	50	0.0988205	12456	252
Figure_5b			Log2		STL	Single_Cell_Data	BUSSEMAKER	Tchourine_2018	ALL	0.75	28668	51	0.0772862	12562	264
Figure_5b			Log2		STL	Single_Cell_Data	BUSSEMAKER	Tchourine_2018	ALL	1	38225	42	0.0774961	13078	324
Figure_5b			Log2		STL	Single_Cell_Data	BUSSEMAKER	Tchourine_2018	ALL	1	38225	43	0.115346	13111	456
Figure_5b			Log2		STL	Single_Cell_Data	BUSSEMAKER	Tchourine_2018	ALL	1	38225	44	0.111731	12969	505
Figure_5b			Log2		STL	Single_Cell_Data	BUSSEMAKER	Tchourine_2018	ALL	1	38225	45	0.0938515	13170	241
Figure_5b			Log2		STL	Single_Cell_Data	BUSSEMAKER	Tchourine_2018	ALL	1	38225	46	0.103988	12988	324
Figure_5b			Log2		STL	Single_Cell_Data	BUSSEMAKER	Tchourine_2018	ALL	1	38225	47	0.0884188	13068	255
Figure_5b			Log2		STL	Single_Cell_Data	BUSSEMAKER	Tchourine_2018	ALL	1	38225	48	0.116881	13007	385
Figure_5b			Log2		STL	Single_Cell_Data	BUSSEMAKER	Tchourine_2018	ALL	1	38225	49	0.0879558	13086	296
Figure_5b			Log2		STL	Single_Cell_Data	BUSSEMAKER	Tchourine_2018	ALL	1	38225	50	0.0973684	13005	258
Figure_5b			Log2		STL	Single_Cell_Data	BUSSEMAKER	Tchourine_2018	ALL	1	38225	51	0.0759126	13155	280
Figure_5c			Log2		STL	Single_Cell_Data		Tchourine_2018	ALL	0.013	495	42	0.158783	1089	1119
Figure_5c			Log2		STL	Single_Cell_Data		Tchourine_2018	ALL	0.013	495	43	0.1662	1187	972
Figure_5c			Log2		STL	Single_Cell_Data		Tchourine_2018	ALL	0.013	495	44	0.203499	1229	1424
Figure_5c			Log2		STL	Single_Cell_Data		Tchourine_2018	ALL	0.013	495	45	0.169704	1413	963
Figure_5c			Log2		STL	Single_Cell_Data		Tchourine_2018	ALL	0.013	495	46	0.181625	1136	1159
Figure_5c			Log2		STL	Single_Cell_Data		Tchourine_2018	ALL	0.013	495	47	0.177843	1234	982
Figure_5c			Log2		STL	Single_Cell_Data		Tchourine_2018	ALL	0.013	495	48	0.181296	1131	975
Figure_5c			Log2		STL	Single_Cell_Data		Tchourine_2018	ALL	0.013	495	49	0.149929	1249	798
Figure_5c			Log2		STL	Single_Cell_Data		Tchourine_2018	ALL	0.013	495	50	0.156524	1270	923
Figure_5c			Log2		STL	Single_Cell_Data		Tchourine_2018	ALL	0.013	495	51	0.179256	1252	1052
Figure_5c			Log2		STL	Single_Cell_Data		Tchourine_2018	RAPA	0.013	500	42	0.100618	609	753
Figure_5c			Log2		STL	Single_Cell_Data		Tchourine_2018	RAPA	0.013	500	43	0.127877	697	976
Figure_5c			Log2		STL	Single_Cell_Data		Tchourine_2018	RAPA	0.013	500	44	0.139219	696	995
Figure_5c			Log2		STL	Single_Cell_Data		Tchourine_2018	RAPA	0.013	500	45	0.112951	599	838
Figure_5c			Log2		STL	Single_Cell_Data		Tchourine_2018	RAPA	0.013	500	46	0.134269	616	787
Figure_5c			Log2		STL	Single_Cell_Data		Tchourine_2018	RAPA	0.013	500	47	0.146441	721	1016
Figure_5c			Log2		STL	Single_Cell_Data		Tchourine_2018	RAPA	0.013	500	48	0.132337	666	920
Figure_5c			Log2		STL	Single_Cell_Data		Tchourine_2018	RAPA	0.013	500	49	0.135259	712	910
Figure_5c			Log2		STL	Single_Cell_Data		Tchourine_2018	RAPA	0.013	500	50	0.11407	701	814
Figure_5c			Log2		STL	Single_Cell_Data		Tchourine_2018	RAPA	0.013	500	51	0.139155	697	1023
Figure_5c			Log2		STL	Single_Cell_Data		Tchourine_2018	NLIMUREA	0.013	500	42	0.124379	849	932
Figure_5c			Log2		STL	Single_Cell_Data		Tchourine_2018	NLIMUREA	0.013	500	43	0.112016	919	663
Figure_5c			Log2		STL	Single_Cell_Data		Tchourine_2018	NLIMUREA	0.013	500	44	0.136765	934	957
Figure_5c			Log2		STL	Single_Cell_Data		Tchourine_2018	NLIMUREA	0.013	500	45	0.129553	915	940
Figure_5c			Log2		STL	Single_Cell_Data		Tchourine_2018	NLIMUREA	0.013	500	46	0.127017	861	959
Figure_5c			Log2		STL	Single_Cell_Data		Tchourine_2018	NLIMUREA	0.013	500	47	0.138928	906	1038
Figure_5c			Log2		STL	Single_Cell_Data		Tchourine_2018	NLIMUREA	0.013	500	48	0.133916	1084	1098
Figure_5c			Log2		STL	Single_Cell_Data		Tchourine_2018	NLIMUREA	0.013	500	49	0.119365	822	837
Figure_5c			Log2		STL	Single_Cell_Data		Tchourine_2018	NLIMUREA	0.013	500	50	0.138826	830	1087
Figure_5c			Log2		STL	Single_Cell_Data		Tchourine_2018	NLIMUREA	0.013	500	51	0.138595	899	1119
Figure_5c			Log2		STL	Single_Cell_Data		Tchourine_2018	MMD	0.013	500	42	0.150725	948	1185
Figure_5c			Log2		STL	Single_Cell_Data		Tchourine_2018	MMD	0.013	500	43	0.157212	1103	1305
Figure_5c			Log2		STL	Single_Cell_Data		Tchourine_2018	MMD	0.013	500	44	0.194651	977	1673
Figure_5c			Log2		STL	Single_Cell_Data		Tchourine_2018	MMD	0.013	500	45	0.153118	869	1143
Figure_5c			Log2		STL	Single_Cell_Data		Tchourine_2018	MMD	0.013	500	46	0.144556	867	829
Figure_5c			Log2		STL	Single_Cell_Data		Tchourine_2018	MMD	0.013	500	47	0.175381	1045	1284
Figure_5c			Log2		STL	Single_Cell_Data		Tchourine_2018	MMD	0.013	500	48	0.167423	830	1367
Figure_5c			Log2		STL	Single_Cell_Data		Tchourine_2018	MMD	0.013	500	49	0.13346	837	909
Figure_5c			Log2		STL	Single_Cell_Data		Tchourine_2018	MMD	0.013	500	50	0.135512	825	950
Figure_5c			Log2		STL	Single_Cell_Data		Tchourine_2018	MMD	0.013	500	51	0.158392	928	1069
Figure_5c			Log2		STL	Single_Cell_Data		Tchourine_2018	MMETOH	0.013	500	42	0.152795	1594	856
Figure_5c			Log2		STL	Single_Cell_Data		Tchourine_2018	MMETOH	0.013	500	43	0.19342	1563	1506
Figure_5c			Log2		STL	Single_Cell_Data		Tchourine_2018	MMETOH	0.013	500	44	0.216307	1422	1673
Figure_5c			Log2		STL	Single_Cell_Data		Tchourine_2018	MMETOH	0.013	500	45	0.150674	1632	1020
Figure_5c			Log2		STL	Single_Cell_Data		Tchourine_2018	MMETOH	0.013	500	46	0.178015	1339	1394
Figure_5c			Log2		STL	Single_Cell_Data		Tchourine_2018	MMETOH	0.013	500	47	0.197945	1478	1234
Figure_5c			Log2		STL	Single_Cell_Data		Tchourine_2018	MMETOH	0.013	500	48	0.195907	1477	1347
Figure_5c			Log2		STL	Single_Cell_Data		Tchourine_2018	MMETOH	0.013	500	49	0.166659	1376	1133
Figure_5c			Log2		STL	Single_Cell_Data		Tchourine_2018	MMETOH	0.013	500	50	0.164752	1559	1187
Figure_5c			Log2		STL	Single_Cell_Data		Tchourine_2018	MMETOH	0.013	500	51	0.175566	1398	1252
Figure_5c			Log2		STL	Single_Cell_Data		Tchourine_2018	YPETOH	0.013	500	42	0.110328	833	604
Figure_5c			Log2		STL	Single_Cell_Data		Tchourine_2018	YPETOH	0.013	500	43	0.131945	1053	894
Figure_5c			Log2		STL	Single_Cell_Data		Tchourine_2018	YPETOH	0.013	500	44	0.142572	1015	1150
Figure_5c			Log2		STL	Single_Cell_Data		Tchourine_2018	YPETOH	0.013	500	45	0.121727	957	783
Figure_5c			Log2		STL	Single_Cell_Data		Tchourine_2018	YPETOH	0.013	500	46	0.118778	911	766
Figure_5c			Log2		STL	Single_Cell_Data		Tchourine_2018	YPETOH	0.013	500	47	0.136124	993	894
Figure_5c			Log2		STL	Single_Cell_Data		Tchourine_2018	YPETOH	0.013	500	48	0.150338	994	955
Figure_5c			Log2		STL	Single_Cell_Data		Tchourine_2018	YPETOH	0.013	500	49	0.125303	929	612
Figure_5c			Log2		STL	Single_Cell_Data		Tchourine_2018	YPETOH	0.013	500	50	0.0972662	957	660
Figure_5c			Log2		STL	Single_Cell_Data		Tchourine_2018	YPETOH	0.013	500	51	0.142964	925	1229
Figure_5c			Log2		STL	Single_Cell_Data		Tchourine_2018	CSTARVE	0.013	500	42	0.080133	539	517
Figure_5c			Log2		STL	Single_Cell_Data		Tchourine_2018	CSTARVE	0.013	500	43	0.0987964	614	879
Figure_5c			Log2		STL	Single_Cell_Data		Tchourine_2018	CSTARVE	0.013	500	44	0.105797	651	836
Figure_5c			Log2		STL	Single_Cell_Data		Tchourine_2018	CSTARVE	0.013	500	45	0.0848859	596	617
Figure_5c			Log2		STL	Single_Cell_Data		Tchourine_2018	CSTARVE	0.013	500	46	0.0846481	541	934
Figure_5c			Log2		STL	Single_Cell_Data		Tchourine_2018	CSTARVE	0.013	500	47	0.083779	596	564
Figure_5c			Log2		STL	Single_Cell_Data		Tchourine_2018	CSTARVE	0.013	500	48	0.123264	640	1082
Figure_5c			Log2		STL	Single_Cell_Data		Tchourine_2018	CSTARVE	0.013	500	49	0.0760594	638	572
Figure_5c			Log2		STL	Single_Cell_Data		Tchourine_2018	CSTARVE	0.013	500	50	0.0606448	601	424
Figure_5c			Log2		STL	Single_Cell_Data		Tchourine_2018	CSTARVE	0.013	500	51	0.0969451	653	617
Figure_5c			Log2		STL	Single_Cell_Data		Tchourine_2018	DIAUXY	0.013	500	42	0.0786773	620	405
Figure_5c			Log2		STL	Single_Cell_Data		Tchourine_2018	DIAUXY	0.013	500	43	0.098727	653	562
Figure_5c			Log2		STL	Single_Cell_Data		Tchourine_2018	DIAUXY	0.013	500	44	0.0873682	633	420
Figure_5c			Log2		STL	Single_Cell_Data		Tchourine_2018	DIAUXY	0.013	500	45	0.0722625	677	373
Figure_5c			Log2		STL	Single_Cell_Data		Tchourine_2018	DIAUXY	0.013	500	46	0.088557	604	516
Figure_5c			Log2		STL	Single_Cell_Data		Tchourine_2018	DIAUXY	0.013	500	47	0.119928	753	728
Figure_5c			Log2		STL	Single_Cell_Data		Tchourine_2018	DIAUXY	0.013	500	48	0.111224	660	633
Figure_5c			Log2		STL	Single_Cell_Data		Tchourine_2018	DIAUXY	0.013	500	49	0.0903137	681	433
Figure_5c			Log2		STL	Single_Cell_Data		Tchourine_2018	DIAUXY	0.013	500	50	0.0932373	607	739
Figure_5c			Log2		STL	Single_Cell_Data		Tchourine_2018	DIAUXY	0.013	500	51	0.0913042	668	546
Figure_5c			Log2		STL	Single_Cell_Data		Tchourine_2018	YPD	0.013	500	42	0.107594	574	796
Figure_5c			Log2		STL	Single_Cell_Data		Tchourine_2018	YPD	0.013	500	43	0.104899	626	735
Figure_5c			Log2		STL	Single_Cell_Data		Tchourine_2018	YPD	0.013	500	44	0.131708	647	943
Figure_5c			Log2		STL	Single_Cell_Data		Tchourine_2018	YPD	0.013	500	45	0.0914254	579	778
Figure_5c			Log2		STL	Single_Cell_Data		Tchourine_2018	YPD	0.013	500	46	0.115378	562	770
Figure_5c			Log2		STL	Single_Cell_Data		Tchourine_2018	YPD	0.013	500	47	0.115582	602	866
Figure_5c			Log2		STL	Single_Cell_Data		Tchourine_2018	YPD	0.013	500	48	0.11708	608	895
Figure_5c			Log2		STL	Single_Cell_Data		Tchourine_2018	YPD	0.013	500	49	0.109373	692	861
Figure_5c			Log2		STL	Single_Cell_Data		Tchourine_2018	YPD	0.013	500	50	0.109097	588	780
Figure_5c			Log2		STL	Single_Cell_Data		Tchourine_2018	YPD	0.013	500	51	0.110256	704	911
Figure_5c			Log2		STL	Single_Cell_Data		Tchourine_2018	NLIMGLN	0.013	500	42	0.141262	1065	1252
Figure_5c			Log2		STL	Single_Cell_Data		Tchourine_2018	NLIMGLN	0.013	500	43	0.135022	1030	879
Figure_5c			Log2		STL	Single_Cell_Data		Tchourine_2018	NLIMGLN	0.013	500	44	0.182448	1081	1291
Figure_5c			Log2		STL	Single_Cell_Data		Tchourine_2018	NLIMGLN	0.013	500	45	0.141372	1146	811
Figure_5c			Log2		STL	Single_Cell_Data		Tchourine_2018	NLIMGLN	0.013	500	46	0.163689	899	1189
Figure_5c			Log2		STL	Single_Cell_Data		Tchourine_2018	NLIMGLN	0.013	500	47	0.167535	1080	1053
Figure_5c			Log2		STL	Single_Cell_Data		Tchourine_2018	NLIMGLN	0.013	500	48	0.188401	996	1321
Figure_5c			Log2		STL	Single_Cell_Data		Tchourine_2018	NLIMGLN	0.013	500	49	0.167156	950	1075
Figure_5c			Log2		STL	Single_Cell_Data		Tchourine_2018	NLIMGLN	0.013	500	50	0.135732	1015	839
Figure_5c			Log2		STL	Single_Cell_Data		Tchourine_2018	NLIMGLN	0.013	500	51	0.152642	1127	1164
Figure_5c			Log2		STL	Single_Cell_Data		Tchourine_2018	NLIMNH4	0.013	500	42	0.107011	861	780
Figure_5c			Log2		STL	Single_Cell_Data		Tchourine_2018	NLIMNH4	0.013	500	43	0.10061	976	661
Figure_5c			Log2		STL	Single_Cell_Data		Tchourine_2018	NLIMNH4	0.013	500	44	0.128144	869	799
Figure_5c			Log2		STL	Single_Cell_Data		Tchourine_2018	NLIMNH4	0.013	500	45	0.111985	1015	746
Figure_5c			Log2		STL	Single_Cell_Data		Tchourine_2018	NLIMNH4	0.013	500	46	0.133612	1012	1127
Figure_5c			Log2		STL	Single_Cell_Data		Tchourine_2018	NLIMNH4	0.013	500	47	0.11948	931	705
Figure_5c			Log2		STL	Single_Cell_Data		Tchourine_2018	NLIMNH4	0.013	500	48	0.144177	762	1087
Figure_5c			Log2		STL	Single_Cell_Data		Tchourine_2018	NLIMNH4	0.013	500	49	0.123561	885	801
Figure_5c			Log2		STL	Single_Cell_Data		Tchourine_2018	NLIMNH4	0.013	500	50	0.109009	855	614
Figure_5c			Log2		STL	Single_Cell_Data		Tchourine_2018	NLIMNH4	0.013	500	51	0.130044	852	745
Figure_5c			Log2		STL	Single_Cell_Data		Tchourine_2018	NLIMPRO	0.013	500	42	0.124447	1119	774
Figure_5c			Log2		STL	Single_Cell_Data		Tchourine_2018	NLIMPRO	0.013	500	43	0.147135	1081	953
Figure_5c			Log2		STL	Single_Cell_Data		Tchourine_2018	NLIMPRO	0.013	500	44	0.157019	1003	1115
Figure_5c			Log2		STL	Single_Cell_Data		Tchourine_2018	NLIMPRO	0.013	500	45	0.137873	1065	816
Figure_5c			Log2		STL	Single_Cell_Data		Tchourine_2018	NLIMPRO	0.013	500	46	0.1333	922	1123
Figure_5c			Log2		STL	Single_Cell_Data		Tchourine_2018	NLIMPRO	0.013	500	47	0.163575	1074	939
Figure_5c			Log2		STL	Single_Cell_Data		Tchourine_2018	NLIMPRO	0.013	500	48	0.152727	940	1140
Figure_5c			Log2		STL	Single_Cell_Data		Tchourine_2018	NLIMPRO	0.013	500	49	0.133036	1017	744
Figure_5c			Log2		STL	Single_Cell_Data		Tchourine_2018	NLIMPRO	0.013	500	50	0.13698	1074	749
Figure_5c			Log2		STL	Single_Cell_Data		Tchourine_2018	NLIMPRO	0.013	500	51	0.164881	990	969
Figure_5d			Log2		STL	Single_Cell_Data	YEASTRACT	Tchourine_2018	ALL	1	38225	52	0.182595	15065	1625
Figure_5d			Log2		STL	Single_Cell_Data	YEASTRACT	Tchourine_2018	ALL	1	38225	53	0.189916	15112	1504
Figure_5d			Log2		STL	Single_Cell_Data	YEASTRACT	Tchourine_2018	ALL	1	38225	54	0.187888	15357	1450
Figure_5d			Log2		STL	Single_Cell_Data	YEASTRACT	Tchourine_2018	ALL	1	38225	55	0.21992	14846	2041
Figure_5d			Log2		STL	Single_Cell_Data	YEASTRACT	Tchourine_2018	ALL	1	38225	56	0.207021	15046	1886
Figure_5d			Log2		STL	Single_Cell_Data	YEASTRACT	Tchourine_2018	ALL	1	38225	57	0.194091	14935	1886
Figure_5d			Log2		STL	Single_Cell_Data	YEASTRACT	Tchourine_2018	ALL	1	38225	58	0.189918	14753	1568
Figure_5d			Log2		STL	Single_Cell_Data	YEASTRACT	Tchourine_2018	ALL	1	38225	59	0.198744	14979	1733
Figure_5d			Log2		STL	Single_Cell_Data	YEASTRACT	Tchourine_2018	ALL	1	38225	60	0.19465	14728	1574
Figure_5d			Log2		STL	Single_Cell_Data	YEASTRACT	Tchourine_2018	ALL	1	38225	61	0.196114	14951	1494
Figure_5d			Log2		MTL	Single_Cell_Data	YEASTRACT	Tchourine_2018	ALL	1	38225	52	0.194812	1791	2512
Figure_5d			Log2		MTL	Single_Cell_Data	YEASTRACT	Tchourine_2018	ALL	1	38225	53	0.192053	1825	2731
Figure_5d			Log2		MTL	Single_Cell_Data	YEASTRACT	Tchourine_2018	ALL	1	38225	54	0.199347	1820	3091
Figure_5d			Log2		MTL	Single_Cell_Data	YEASTRACT	Tchourine_2018	ALL	1	38225	55	0.21647	1840	2953
Figure_5d			Log2		MTL	Single_Cell_Data	YEASTRACT	Tchourine_2018	ALL	1	38225	56	0.212682	1833	3190
Figure_5d			Log2		MTL	Single_Cell_Data	YEASTRACT	Tchourine_2018	ALL	1	38225	57	0.212418	1802	2651
Figure_5d			Log2		MTL	Single_Cell_Data	YEASTRACT	Tchourine_2018	ALL	1	38225	58	0.216257	1919	2799
Figure_5d			Log2		MTL	Single_Cell_Data	YEASTRACT	Tchourine_2018	ALL	1	38225	59	0.210531	1840	3134
Figure_5d			Log2		MTL	Single_Cell_Data	YEASTRACT	Tchourine_2018	ALL	1	38225	60	0.207424	1775	2979
Figure_5d			Log2		MTL	Single_Cell_Data	YEASTRACT	Tchourine_2018	ALL	1	38225	61	0.206066	1857	3099

## Sheet: Sheet13
Figure	Label	Normalization	Tranformation	Imputation	Tasking	Input_Data	Priors	Gold Standard	Conditions	Size	Count	Seed	AUPR	N_CONF	N_PREC
Figure_5e			Log2		MTL-BBSR	Single_Cell_Data	YEASTRACT_2019	Tchourine_2018	DIAUXY	1	3332	52	0.101513
Figure_5e			Log2		MTL-BBSR	Single_Cell_Data	YEASTRACT_2019	Tchourine_2018	YPD	1	11037	52	0.150588
Figure_5e			Log2		MTL-BBSR	Single_Cell_Data	YEASTRACT_2019	Tchourine_2018	NLIMGLN	1	1644	52	0.155958
Figure_5e			Log2		MTL-BBSR	Single_Cell_Data	YEASTRACT_2019	Tchourine_2018	MMD	1	1894	52	0.189347
Figure_5e			Log2		MTL-BBSR	Single_Cell_Data	YEASTRACT_2019	Tchourine_2018	CSTARVE	1	3549	52	0.127063
Figure_5e			Log2		MTL-BBSR	Single_Cell_Data	YEASTRACT_2019	Tchourine_2018	RAPA	1	11805	52	0.166852
Figure_5e			Log2		MTL-BBSR	Single_Cell_Data	YEASTRACT_2019	Tchourine_2018	MMEtOH	1	581	52	0.160361
Figure_5e			Log2		MTL-BBSR	Single_Cell_Data	YEASTRACT_2019	Tchourine_2018	NLIMUREA	1	992	52	0.14414
Figure_5e			Log2		MTL-BBSR	Single_Cell_Data	YEASTRACT_2019	Tchourine_2018	YPEtOH	1	1427	52	0.137148
Figure_5e			Log2		MTL-BBSR	Single_Cell_Data	YEASTRACT_2019	Tchourine_2018	NLIMPRO	1	853	52	0.118194
Figure_5e			Log2		MTL-BBSR	Single_Cell_Data	YEASTRACT_2019	Tchourine_2018	NLIMNH4	1	1111	52	0.127064
Figure_5e			Log2		MTL-BBSR	Single_Cell_Data	YEASTRACT_2019	Tchourine_2018	ALL	1	38225	52	0.248216
Figure_5e			Log2		MTL-BBSR	Single_Cell_Data	YEASTRACT_2019	Tchourine_2018	CSTARVE	1	3549	53	0.133543
Figure_5e			Log2		MTL-BBSR	Single_Cell_Data	YEASTRACT_2019	Tchourine_2018	RAPA	1	11805	53	0.160873
Figure_5e			Log2		MTL-BBSR	Single_Cell_Data	YEASTRACT_2019	Tchourine_2018	DIAUXY	1	3332	53	0.0825669
Figure_5e			Log2		MTL-BBSR	Single_Cell_Data	YEASTRACT_2019	Tchourine_2018	NLIMGLN	1	1644	53	0.147339
Figure_5e			Log2		MTL-BBSR	Single_Cell_Data	YEASTRACT_2019	Tchourine_2018	NLIMUREA	1	992	53	0.135465
Figure_5e			Log2		MTL-BBSR	Single_Cell_Data	YEASTRACT_2019	Tchourine_2018	YPD	1	11037	53	0.150457
Figure_5e			Log2		MTL-BBSR	Single_Cell_Data	YEASTRACT_2019	Tchourine_2018	NLIMPRO	1	853	53	0.120575
Figure_5e			Log2		MTL-BBSR	Single_Cell_Data	YEASTRACT_2019	Tchourine_2018	YPEtOH	1	1427	53	0.116433
Figure_5e			Log2		MTL-BBSR	Single_Cell_Data	YEASTRACT_2019	Tchourine_2018	MMD	1	1894	53	0.167994
Figure_5e			Log2		MTL-BBSR	Single_Cell_Data	YEASTRACT_2019	Tchourine_2018	NLIMNH4	1	1111	53	0.11733
Figure_5e			Log2		MTL-BBSR	Single_Cell_Data	YEASTRACT_2019	Tchourine_2018	MMEtOH	1	581	53	0.143296
Figure_5e			Log2		MTL-BBSR	Single_Cell_Data	YEASTRACT_2019	Tchourine_2018	ALL	1	38225	53	0.235127
Figure_5e			Log2		MTL-BBSR	Single_Cell_Data	YEASTRACT_2019	Tchourine_2018	YPD	1	11037	54	0.147966
Figure_5e			Log2		MTL-BBSR	Single_Cell_Data	YEASTRACT_2019	Tchourine_2018	MMD	1	1894	54	0.186716
Figure_5e			Log2		MTL-BBSR	Single_Cell_Data	YEASTRACT_2019	Tchourine_2018	NLIMUREA	1	992	54	0.145121
Figure_5e			Log2		MTL-BBSR	Single_Cell_Data	YEASTRACT_2019	Tchourine_2018	CSTARVE	1	3549	54	0.111244
Figure_5e			Log2		MTL-BBSR	Single_Cell_Data	YEASTRACT_2019	Tchourine_2018	RAPA	1	11805	54	0.162266
Figure_5e			Log2		MTL-BBSR	Single_Cell_Data	YEASTRACT_2019	Tchourine_2018	NLIMGLN	1	1644	54	0.155911
Figure_5e			Log2		MTL-BBSR	Single_Cell_Data	YEASTRACT_2019	Tchourine_2018	NLIMNH4	1	1111	54	0.131645
Figure_5e			Log2		MTL-BBSR	Single_Cell_Data	YEASTRACT_2019	Tchourine_2018	MMEtOH	1	581	54	0.168723
Figure_5e			Log2		MTL-BBSR	Single_Cell_Data	YEASTRACT_2019	Tchourine_2018	DIAUXY	1	3332	54	0.0978758
Figure_5e			Log2		MTL-BBSR	Single_Cell_Data	YEASTRACT_2019	Tchourine_2018	YPEtOH	1	1427	54	0.128756
Figure_5e			Log2		MTL-BBSR	Single_Cell_Data	YEASTRACT_2019	Tchourine_2018	NLIMPRO	1	853	54	0.150036
Figure_5e			Log2		MTL-BBSR	Single_Cell_Data	YEASTRACT_2019	Tchourine_2018	ALL	1	38225	54	0.25462
Figure_5e			Log2		MTL-BBSR	Single_Cell_Data	YEASTRACT_2019	Tchourine_2018	NLIMGLN	1	1644	55	0.164725
Figure_5e			Log2		MTL-BBSR	Single_Cell_Data	YEASTRACT_2019	Tchourine_2018	YPD	1	11037	55	0.158948
Figure_5e			Log2		MTL-BBSR	Single_Cell_Data	YEASTRACT_2019	Tchourine_2018	RAPA	1	11805	55	0.181666
Figure_5e			Log2		MTL-BBSR	Single_Cell_Data	YEASTRACT_2019	Tchourine_2018	CSTARVE	1	3549	55	0.131192
Figure_5e			Log2		MTL-BBSR	Single_Cell_Data	YEASTRACT_2019	Tchourine_2018	DIAUXY	1	3332	55	0.0944541
Figure_5e			Log2		MTL-BBSR	Single_Cell_Data	YEASTRACT_2019	Tchourine_2018	YPEtOH	1	1427	55	0.142834
Figure_5e			Log2		MTL-BBSR	Single_Cell_Data	YEASTRACT_2019	Tchourine_2018	MMD	1	1894	55	0.195611
Figure_5e			Log2		MTL-BBSR	Single_Cell_Data	YEASTRACT_2019	Tchourine_2018	NLIMUREA	1	992	55	0.152418
Figure_5e			Log2		MTL-BBSR	Single_Cell_Data	YEASTRACT_2019	Tchourine_2018	NLIMPRO	1	853	55	0.14132
Figure_5e			Log2		MTL-BBSR	Single_Cell_Data	YEASTRACT_2019	Tchourine_2018	NLIMNH4	1	1111	55	0.137635
Figure_5e			Log2		MTL-BBSR	Single_Cell_Data	YEASTRACT_2019	Tchourine_2018	MMEtOH	1	581	55	0.173273
Figure_5e			Log2		MTL-BBSR	Single_Cell_Data	YEASTRACT_2019	Tchourine_2018	ALL	1	38225	55	0.259016
Figure_5e			Log2		MTL-BBSR	Single_Cell_Data	YEASTRACT_2019	Tchourine_2018	YPD	1	11037	56	0.149025
Figure_5e			Log2		MTL-BBSR	Single_Cell_Data	YEASTRACT_2019	Tchourine_2018	RAPA	1	11805	56	0.166912
Figure_5e			Log2		MTL-BBSR	Single_Cell_Data	YEASTRACT_2019	Tchourine_2018	NLIMNH4	1	1111	56	0.123824
Figure_5e			Log2		MTL-BBSR	Single_Cell_Data	YEASTRACT_2019	Tchourine_2018	DIAUXY	1	3332	56	0.102231
Figure_5e			Log2		MTL-BBSR	Single_Cell_Data	YEASTRACT_2019	Tchourine_2018	NLIMGLN	1	1644	56	0.160149
Figure_5e			Log2		MTL-BBSR	Single_Cell_Data	YEASTRACT_2019	Tchourine_2018	CSTARVE	1	3549	56	0.140829
Figure_5e			Log2		MTL-BBSR	Single_Cell_Data	YEASTRACT_2019	Tchourine_2018	MMEtOH	1	581	56	0.169791
Figure_5e			Log2		MTL-BBSR	Single_Cell_Data	YEASTRACT_2019	Tchourine_2018	NLIMPRO	1	853	56	0.136708
Figure_5e			Log2		MTL-BBSR	Single_Cell_Data	YEASTRACT_2019	Tchourine_2018	NLIMUREA	1	992	56	0.13824
Figure_5e			Log2		MTL-BBSR	Single_Cell_Data	YEASTRACT_2019	Tchourine_2018	YPEtOH	1	1427	56	0.126299
Figure_5e			Log2		MTL-BBSR	Single_Cell_Data	YEASTRACT_2019	Tchourine_2018	MMD	1	1894	56	0.179004
Figure_5e			Log2		MTL-BBSR	Single_Cell_Data	YEASTRACT_2019	Tchourine_2018	ALL	1	38225	56	0.259421
Figure_5e			Log2		MTL-BBSR	Single_Cell_Data	YEASTRACT_2019	Tchourine_2018	YPEtOH	1	1427	57	0.118516
Figure_5e			Log2		MTL-BBSR	Single_Cell_Data	YEASTRACT_2019	Tchourine_2018	RAPA	1	11805	57	0.178066
Figure_5e			Log2		MTL-BBSR	Single_Cell_Data	YEASTRACT_2019	Tchourine_2018	YPD	1	11037	57	0.151667
Figure_5e			Log2		MTL-BBSR	Single_Cell_Data	YEASTRACT_2019	Tchourine_2018	DIAUXY	1	3332	57	0.0866956
Figure_5e			Log2		MTL-BBSR	Single_Cell_Data	YEASTRACT_2019	Tchourine_2018	NLIMUREA	1	992	57	0.144926
Figure_5e			Log2		MTL-BBSR	Single_Cell_Data	YEASTRACT_2019	Tchourine_2018	CSTARVE	1	3549	57	0.0897659
Figure_5e			Log2		MTL-BBSR	Single_Cell_Data	YEASTRACT_2019	Tchourine_2018	MMD	1	1894	57	0.183722
Figure_5e			Log2		MTL-BBSR	Single_Cell_Data	YEASTRACT_2019	Tchourine_2018	NLIMNH4	1	1111	57	0.123662
Figure_5e			Log2		MTL-BBSR	Single_Cell_Data	YEASTRACT_2019	Tchourine_2018	MMEtOH	1	581	57	0.148142
Figure_5e			Log2		MTL-BBSR	Single_Cell_Data	YEASTRACT_2019	Tchourine_2018	NLIMPRO	1	853	57	0.128266
Figure_5e			Log2		MTL-BBSR	Single_Cell_Data	YEASTRACT_2019	Tchourine_2018	NLIMGLN	1	1644	57	0.149871
Figure_5e			Log2		MTL-BBSR	Single_Cell_Data	YEASTRACT_2019	Tchourine_2018	ALL	1	38225	57	0.237769
Figure_5e			Log2		MTL-BBSR	Single_Cell_Data	YEASTRACT_2019	Tchourine_2018	NLIMNH4	1	1111	58	0.147993
Figure_5e			Log2		MTL-BBSR	Single_Cell_Data	YEASTRACT_2019	Tchourine_2018	YPD	1	11037	58	0.170697
Figure_5e			Log2		MTL-BBSR	Single_Cell_Data	YEASTRACT_2019	Tchourine_2018	RAPA	1	11805	58	0.179557
Figure_5e			Log2		MTL-BBSR	Single_Cell_Data	YEASTRACT_2019	Tchourine_2018	DIAUXY	1	3332	58	0.117579
Figure_5e			Log2		MTL-BBSR	Single_Cell_Data	YEASTRACT_2019	Tchourine_2018	CSTARVE	1	3549	58	0.153755
Figure_5e			Log2		MTL-BBSR	Single_Cell_Data	YEASTRACT_2019	Tchourine_2018	MMD	1	1894	58	0.189448
Figure_5e			Log2		MTL-BBSR	Single_Cell_Data	YEASTRACT_2019	Tchourine_2018	YPEtOH	1	1427	58	0.152119
Figure_5e			Log2		MTL-BBSR	Single_Cell_Data	YEASTRACT_2019	Tchourine_2018	NLIMPRO	1	853	58	0.149017
Figure_5e			Log2		MTL-BBSR	Single_Cell_Data	YEASTRACT_2019	Tchourine_2018	NLIMGLN	1	1644	58	0.162369
Figure_5e			Log2		MTL-BBSR	Single_Cell_Data	YEASTRACT_2019	Tchourine_2018	NLIMUREA	1	992	58	0.154739
Figure_5e			Log2		MTL-BBSR	Single_Cell_Data	YEASTRACT_2019	Tchourine_2018	MMEtOH	1	581	58	0.176702
Figure_5e			Log2		MTL-BBSR	Single_Cell_Data	YEASTRACT_2019	Tchourine_2018	ALL	1	38225	58	0.244914
Figure_5e			Log2		MTL-BBSR	Single_Cell_Data	YEASTRACT_2019	Tchourine_2018	DIAUXY	1	3332	59	0.10861
Figure_5e			Log2		MTL-BBSR	Single_Cell_Data	YEASTRACT_2019	Tchourine_2018	YPD	1	11037	59	0.148438
Figure_5e			Log2		MTL-BBSR	Single_Cell_Data	YEASTRACT_2019	Tchourine_2018	YPEtOH	1	1427	59	0.151858
Figure_5e			Log2		MTL-BBSR	Single_Cell_Data	YEASTRACT_2019	Tchourine_2018	MMEtOH	1	581	59	0.140504
Figure_5e			Log2		MTL-BBSR	Single_Cell_Data	YEASTRACT_2019	Tchourine_2018	NLIMGLN	1	1644	59	0.146759
Figure_5e			Log2		MTL-BBSR	Single_Cell_Data	YEASTRACT_2019	Tchourine_2018	RAPA	1	11805	59	0.171556
Figure_5e			Log2		MTL-BBSR	Single_Cell_Data	YEASTRACT_2019	Tchourine_2018	CSTARVE	1	3549	59	0.122334
Figure_5e			Log2		MTL-BBSR	Single_Cell_Data	YEASTRACT_2019	Tchourine_2018	NLIMUREA	1	992	59	0.151339
Figure_5e			Log2		MTL-BBSR	Single_Cell_Data	YEASTRACT_2019	Tchourine_2018	NLIMNH4	1	1111	59	0.143768
Figure_5e			Log2		MTL-BBSR	Single_Cell_Data	YEASTRACT_2019	Tchourine_2018	MMD	1	1894	59	0.184775
Figure_5e			Log2		MTL-BBSR	Single_Cell_Data	YEASTRACT_2019	Tchourine_2018	NLIMPRO	1	853	59	0.121135
Figure_5e			Log2		MTL-BBSR	Single_Cell_Data	YEASTRACT_2019	Tchourine_2018	ALL	1	38225	59	0.23099
Figure_5e			Log2		MTL-BBSR	Single_Cell_Data	YEASTRACT_2019	Tchourine_2018	YPEtOH	1	1427	60	0.143509
Figure_5e			Log2		MTL-BBSR	Single_Cell_Data	YEASTRACT_2019	Tchourine_2018	RAPA	1	11805	60	0.16826
Figure_5e			Log2		MTL-BBSR	Single_Cell_Data	YEASTRACT_2019	Tchourine_2018	CSTARVE	1	3549	60	0.145063
Figure_5e			Log2		MTL-BBSR	Single_Cell_Data	YEASTRACT_2019	Tchourine_2018	MMEtOH	1	581	60	0.161483
Figure_5e			Log2		MTL-BBSR	Single_Cell_Data	YEASTRACT_2019	Tchourine_2018	DIAUXY	1	3332	60	0.0961279
Figure_5e			Log2		MTL-BBSR	Single_Cell_Data	YEASTRACT_2019	Tchourine_2018	YPD	1	11037	60	0.163696
Figure_5e			Log2		MTL-BBSR	Single_Cell_Data	YEASTRACT_2019	Tchourine_2018	NLIMGLN	1	1644	60	0.140837
Figure_5e			Log2		MTL-BBSR	Single_Cell_Data	YEASTRACT_2019	Tchourine_2018	NLIMUREA	1	992	60	0.153685
Figure_5e			Log2		MTL-BBSR	Single_Cell_Data	YEASTRACT_2019	Tchourine_2018	MMD	1	1894	60	0.176848
Figure_5e			Log2		MTL-BBSR	Single_Cell_Data	YEASTRACT_2019	Tchourine_2018	NLIMNH4	1	1111	60	0.137076
Figure_5e			Log2		MTL-BBSR	Single_Cell_Data	YEASTRACT_2019	Tchourine_2018	NLIMPRO	1	853	60	0.120283
Figure_5e			Log2		MTL-BBSR	Single_Cell_Data	YEASTRACT_2019	Tchourine_2018	ALL	1	38225	60	0.249196
Figure_5e			Log2		MTL-BBSR	Single_Cell_Data	YEASTRACT_2019	Tchourine_2018	NLIMGLN	1	1644	61	0.150937
Figure_5e			Log2		MTL-BBSR	Single_Cell_Data	YEASTRACT_2019	Tchourine_2018	YPD	1	11037	61	0.172263
Figure_5e			Log2		MTL-BBSR	Single_Cell_Data	YEASTRACT_2019	Tchourine_2018	MMD	1	1894	61	0.195203
Figure_5e			Log2		MTL-BBSR	Single_Cell_Data	YEASTRACT_2019	Tchourine_2018	RAPA	1	11805	61	0.161957
Figure_5e			Log2		MTL-BBSR	Single_Cell_Data	YEASTRACT_2019	Tchourine_2018	NLIMUREA	1	992	61	0.154564
Figure_5e			Log2		MTL-BBSR	Single_Cell_Data	YEASTRACT_2019	Tchourine_2018	YPEtOH	1	1427	61	0.126355
Figure_5e			Log2		MTL-BBSR	Single_Cell_Data	YEASTRACT_2019	Tchourine_2018	CSTARVE	1	3549	61	0.0927477
Figure_5e			Log2		MTL-BBSR	Single_Cell_Data	YEASTRACT_2019	Tchourine_2018	DIAUXY	1	3332	61	0.0854475
Figure_5e			Log2		MTL-BBSR	Single_Cell_Data	YEASTRACT_2019	Tchourine_2018	NLIMPRO	1	853	61	0.144344
Figure_5e			Log2		MTL-BBSR	Single_Cell_Data	YEASTRACT_2019	Tchourine_2018	NLIMNH4	1	1111	61	0.150757
Figure_5e			Log2		MTL-BBSR	Single_Cell_Data	YEASTRACT_2019	Tchourine_2018	MMEtOH	1	581	61	0.140228
Figure_5e			Log2		MTL-BBSR	Single_Cell_Data	YEASTRACT_2019	Tchourine_2018	ALL	1	38225	61	0.240947
Figure_5e			Log2		MTL-AMUSR	Single_Cell_Data	YEASTRACT_2019	Tchourine_2018	DIAUXY	1	3332	52	0.128969
Figure_5e			Log2		MTL-AMUSR	Single_Cell_Data	YEASTRACT_2019	Tchourine_2018	YPD	1	11037	52	0.120622
Figure_5e			Log2		MTL-AMUSR	Single_Cell_Data	YEASTRACT_2019	Tchourine_2018	NLIMGLN	1	1644	52	0.162611
Figure_5e			Log2		MTL-AMUSR	Single_Cell_Data	YEASTRACT_2019	Tchourine_2018	MMD	1	1894	52	0.183274
Figure_5e			Log2		MTL-AMUSR	Single_Cell_Data	YEASTRACT_2019	Tchourine_2018	CSTARVE	1	3549	52	0.115865
Figure_5e			Log2		MTL-AMUSR	Single_Cell_Data	YEASTRACT_2019	Tchourine_2018	RAPA	1	11805	52	0.137305
Figure_5e			Log2		MTL-AMUSR	Single_Cell_Data	YEASTRACT_2019	Tchourine_2018	MMEtOH	1	581	52	0.129426
Figure_5e			Log2		MTL-AMUSR	Single_Cell_Data	YEASTRACT_2019	Tchourine_2018	NLIMUREA	1	992	52	0.120704
Figure_5e			Log2		MTL-AMUSR	Single_Cell_Data	YEASTRACT_2019	Tchourine_2018	YPEtOH	1	1427	52	0.116047
Figure_5e			Log2		MTL-AMUSR	Single_Cell_Data	YEASTRACT_2019	Tchourine_2018	NLIMPRO	1	853	52	0.0966617
Figure_5e			Log2		MTL-AMUSR	Single_Cell_Data	YEASTRACT_2019	Tchourine_2018	NLIMNH4	1	1111	52	0.109646
Figure_5e			Log2		MTL-AMUSR	Single_Cell_Data	YEASTRACT_2019	Tchourine_2018	ALL	1	38225	52	0.224518
Figure_5e			Log2		MTL-AMUSR	Single_Cell_Data	YEASTRACT_2019	Tchourine_2018	CSTARVE	1	3549	53	0.126664
Figure_5e			Log2		MTL-AMUSR	Single_Cell_Data	YEASTRACT_2019	Tchourine_2018	RAPA	1	11805	53	0.118181
Figure_5e			Log2		MTL-AMUSR	Single_Cell_Data	YEASTRACT_2019	Tchourine_2018	DIAUXY	1	3332	53	0.113993
Figure_5e			Log2		MTL-AMUSR	Single_Cell_Data	YEASTRACT_2019	Tchourine_2018	NLIMGLN	1	1644	53	0.146025
Figure_5e			Log2		MTL-AMUSR	Single_Cell_Data	YEASTRACT_2019	Tchourine_2018	NLIMUREA	1	992	53	0.103365
Figure_5e			Log2		MTL-AMUSR	Single_Cell_Data	YEASTRACT_2019	Tchourine_2018	YPD	1	11037	53	0.113668
Figure_5e			Log2		MTL-AMUSR	Single_Cell_Data	YEASTRACT_2019	Tchourine_2018	NLIMPRO	1	853	53	0.0830415
Figure_5e			Log2		MTL-AMUSR	Single_Cell_Data	YEASTRACT_2019	Tchourine_2018	YPEtOH	1	1427	53	0.101649
Figure_5e			Log2		MTL-AMUSR	Single_Cell_Data	YEASTRACT_2019	Tchourine_2018	MMD	1	1894	53	0.164669
Figure_5e			Log2		MTL-AMUSR	Single_Cell_Data	YEASTRACT_2019	Tchourine_2018	NLIMNH4	1	1111	53	0.0967869
Figure_5e			Log2		MTL-AMUSR	Single_Cell_Data	YEASTRACT_2019	Tchourine_2018	MMEtOH	1	581	53	0.103221
Figure_5e			Log2		MTL-AMUSR	Single_Cell_Data	YEASTRACT_2019	Tchourine_2018	ALL	1	38225	53	0.230932
Figure_5e			Log2		MTL-AMUSR	Single_Cell_Data	YEASTRACT_2019	Tchourine_2018	YPD	1	11037	54	0.121103
Figure_5e			Log2		MTL-AMUSR	Single_Cell_Data	YEASTRACT_2019	Tchourine_2018	MMD	1	1894	54	0.19241
Figure_5e			Log2		MTL-AMUSR	Single_Cell_Data	YEASTRACT_2019	Tchourine_2018	NLIMUREA	1	992	54	0.124108
Figure_5e			Log2		MTL-AMUSR	Single_Cell_Data	YEASTRACT_2019	Tchourine_2018	CSTARVE	1	3549	54	0.104847
Figure_5e			Log2		MTL-AMUSR	Single_Cell_Data	YEASTRACT_2019	Tchourine_2018	RAPA	1	11805	54	0.124502
Figure_5e			Log2		MTL-AMUSR	Single_Cell_Data	YEASTRACT_2019	Tchourine_2018	NLIMGLN	1	1644	54	0.173018
Figure_5e			Log2		MTL-AMUSR	Single_Cell_Data	YEASTRACT_2019	Tchourine_2018	NLIMNH4	1	1111	54	0.133265
Figure_5e			Log2		MTL-AMUSR	Single_Cell_Data	YEASTRACT_2019	Tchourine_2018	MMEtOH	1	581	54	0.120907
Figure_5e			Log2		MTL-AMUSR	Single_Cell_Data	YEASTRACT_2019	Tchourine_2018	DIAUXY	1	3332	54	0.139165
Figure_5e			Log2		MTL-AMUSR	Single_Cell_Data	YEASTRACT_2019	Tchourine_2018	YPEtOH	1	1427	54	0.109258
Figure_5e			Log2		MTL-AMUSR	Single_Cell_Data	YEASTRACT_2019	Tchourine_2018	NLIMPRO	1	853	54	0.115451
Figure_5e			Log2		MTL-AMUSR	Single_Cell_Data	YEASTRACT_2019	Tchourine_2018	ALL	1	38225	54	0.243367
Figure_5e			Log2		MTL-AMUSR	Single_Cell_Data	YEASTRACT_2019	Tchourine_2018	NLIMGLN	1	1644	55	0.151995
Figure_5e			Log2		MTL-AMUSR	Single_Cell_Data	YEASTRACT_2019	Tchourine_2018	YPD	1	11037	55	0.125929
Figure_5e			Log2		MTL-AMUSR	Single_Cell_Data	YEASTRACT_2019	Tchourine_2018	RAPA	1	11805	55	0.142736
Figure_5e			Log2		MTL-AMUSR	Single_Cell_Data	YEASTRACT_2019	Tchourine_2018	CSTARVE	1	3549	55	0.116276
Figure_5e			Log2		MTL-AMUSR	Single_Cell_Data	YEASTRACT_2019	Tchourine_2018	DIAUXY	1	3332	55	0.13288
Figure_5e			Log2		MTL-AMUSR	Single_Cell_Data	YEASTRACT_2019	Tchourine_2018	YPEtOH	1	1427	55	0.120145
Figure_5e			Log2		MTL-AMUSR	Single_Cell_Data	YEASTRACT_2019	Tchourine_2018	MMD	1	1894	55	0.177942
Figure_5e			Log2		MTL-AMUSR	Single_Cell_Data	YEASTRACT_2019	Tchourine_2018	NLIMUREA	1	992	55	0.127255
Figure_5e			Log2		MTL-AMUSR	Single_Cell_Data	YEASTRACT_2019	Tchourine_2018	NLIMPRO	1	853	55	0.105513
Figure_5e			Log2		MTL-AMUSR	Single_Cell_Data	YEASTRACT_2019	Tchourine_2018	NLIMNH4	1	1111	55	0.121691
Figure_5e			Log2		MTL-AMUSR	Single_Cell_Data	YEASTRACT_2019	Tchourine_2018	MMEtOH	1	581	55	0.116593
Figure_5e			Log2		MTL-AMUSR	Single_Cell_Data	YEASTRACT_2019	Tchourine_2018	ALL	1	38225	55	0.232812
Figure_5e			Log2		MTL-AMUSR	Single_Cell_Data	YEASTRACT_2019	Tchourine_2018	YPD	1	11037	56	0.116401
Figure_5e			Log2		MTL-AMUSR	Single_Cell_Data	YEASTRACT_2019	Tchourine_2018	RAPA	1	11805	56	0.11955
Figure_5e			Log2		MTL-AMUSR	Single_Cell_Data	YEASTRACT_2019	Tchourine_2018	NLIMNH4	1	1111	56	0.127668
Figure_5e			Log2		MTL-AMUSR	Single_Cell_Data	YEASTRACT_2019	Tchourine_2018	DIAUXY	1	3332	56	0.131747
Figure_5e			Log2		MTL-AMUSR	Single_Cell_Data	YEASTRACT_2019	Tchourine_2018	NLIMGLN	1	1644	56	0.159087
Figure_5e			Log2		MTL-AMUSR	Single_Cell_Data	YEASTRACT_2019	Tchourine_2018	CSTARVE	1	3549	56	0.128053
Figure_5e			Log2		MTL-AMUSR	Single_Cell_Data	YEASTRACT_2019	Tchourine_2018	MMEtOH	1	581	56	0.122822
Figure_5e			Log2		MTL-AMUSR	Single_Cell_Data	YEASTRACT_2019	Tchourine_2018	NLIMPRO	1	853	56	0.103828
Figure_5e			Log2		MTL-AMUSR	Single_Cell_Data	YEASTRACT_2019	Tchourine_2018	NLIMUREA	1	992	56	0.124972
Figure_5e			Log2		MTL-AMUSR	Single_Cell_Data	YEASTRACT_2019	Tchourine_2018	YPEtOH	1	1427	56	0.115866
Figure_5e			Log2		MTL-AMUSR	Single_Cell_Data	YEASTRACT_2019	Tchourine_2018	MMD	1	1894	56	0.192906
Figure_5e			Log2		MTL-AMUSR	Single_Cell_Data	YEASTRACT_2019	Tchourine_2018	ALL	1	38225	56	0.238473
Figure_5e			Log2		MTL-AMUSR	Single_Cell_Data	YEASTRACT_2019	Tchourine_2018	YPEtOH	1	1427	57	0.109326
Figure_5e			Log2		MTL-AMUSR	Single_Cell_Data	YEASTRACT_2019	Tchourine_2018	RAPA	1	11805	57	0.137799
Figure_5e			Log2		MTL-AMUSR	Single_Cell_Data	YEASTRACT_2019	Tchourine_2018	YPD	1	11037	57	0.118271
Figure_5e			Log2		MTL-AMUSR	Single_Cell_Data	YEASTRACT_2019	Tchourine_2018	DIAUXY	1	3332	57	0.130335
Figure_5e			Log2		MTL-AMUSR	Single_Cell_Data	YEASTRACT_2019	Tchourine_2018	NLIMUREA	1	992	57	0.120311
Figure_5e			Log2		MTL-AMUSR	Single_Cell_Data	YEASTRACT_2019	Tchourine_2018	CSTARVE	1	3549	57	0.133433
Figure_5e			Log2		MTL-AMUSR	Single_Cell_Data	YEASTRACT_2019	Tchourine_2018	MMD	1	1894	57	0.166117
Figure_5e			Log2		MTL-AMUSR	Single_Cell_Data	YEASTRACT_2019	Tchourine_2018	NLIMNH4	1	1111	57	0.116381
Figure_5e			Log2		MTL-AMUSR	Single_Cell_Data	YEASTRACT_2019	Tchourine_2018	MMEtOH	1	581	57	0.118598
Figure_5e			Log2		MTL-AMUSR	Single_Cell_Data	YEASTRACT_2019	Tchourine_2018	NLIMPRO	1	853	57	0.098613
Figure_5e			Log2		MTL-AMUSR	Single_Cell_Data	YEASTRACT_2019	Tchourine_2018	NLIMGLN	1	1644	57	0.144832
Figure_5e			Log2		MTL-AMUSR	Single_Cell_Data	YEASTRACT_2019	Tchourine_2018	ALL	1	38225	57	0.24231
Figure_5e			Log2		MTL-AMUSR	Single_Cell_Data	YEASTRACT_2019	Tchourine_2018	NLIMNH4	1	1111	58	0.13074
Figure_5e			Log2		MTL-AMUSR	Single_Cell_Data	YEASTRACT_2019	Tchourine_2018	YPD	1	11037	58	0.145587
Figure_5e			Log2		MTL-AMUSR	Single_Cell_Data	YEASTRACT_2019	Tchourine_2018	RAPA	1	11805	58	0.154866
Figure_5e			Log2		MTL-AMUSR	Single_Cell_Data	YEASTRACT_2019	Tchourine_2018	DIAUXY	1	3332	58	0.15528
Figure_5e			Log2		MTL-AMUSR	Single_Cell_Data	YEASTRACT_2019	Tchourine_2018	CSTARVE	1	3549	58	0.133009
Figure_5e			Log2		MTL-AMUSR	Single_Cell_Data	YEASTRACT_2019	Tchourine_2018	MMD	1	1894	58	0.186907
Figure_5e			Log2		MTL-AMUSR	Single_Cell_Data	YEASTRACT_2019	Tchourine_2018	YPEtOH	1	1427	58	0.14791
Figure_5e			Log2		MTL-AMUSR	Single_Cell_Data	YEASTRACT_2019	Tchourine_2018	NLIMPRO	1	853	58	0.139371
Figure_5e			Log2		MTL-AMUSR	Single_Cell_Data	YEASTRACT_2019	Tchourine_2018	NLIMGLN	1	1644	58	0.169369
Figure_5e			Log2		MTL-AMUSR	Single_Cell_Data	YEASTRACT_2019	Tchourine_2018	NLIMUREA	1	992	58	0.137916
Figure_5e			Log2		MTL-AMUSR	Single_Cell_Data	YEASTRACT_2019	Tchourine_2018	MMEtOH	1	581	58	0.139937
Figure_5e			Log2		MTL-AMUSR	Single_Cell_Data	YEASTRACT_2019	Tchourine_2018	ALL	1	38225	58	0.241881
Figure_5e			Log2		MTL-AMUSR	Single_Cell_Data	YEASTRACT_2019	Tchourine_2018	DIAUXY	1	3332	59	0.146392
Figure_5e			Log2		MTL-AMUSR	Single_Cell_Data	YEASTRACT_2019	Tchourine_2018	YPD	1	11037	59	0.127098
Figure_5e			Log2		MTL-AMUSR	Single_Cell_Data	YEASTRACT_2019	Tchourine_2018	YPEtOH	1	1427	59	0.124677
Figure_5e			Log2		MTL-AMUSR	Single_Cell_Data	YEASTRACT_2019	Tchourine_2018	MMEtOH	1	581	59	0.122373
Figure_5e			Log2		MTL-AMUSR	Single_Cell_Data	YEASTRACT_2019	Tchourine_2018	NLIMGLN	1	1644	59	0.166429
Figure_5e			Log2		MTL-AMUSR	Single_Cell_Data	YEASTRACT_2019	Tchourine_2018	RAPA	1	11805	59	0.124941
Figure_5e			Log2		MTL-AMUSR	Single_Cell_Data	YEASTRACT_2019	Tchourine_2018	CSTARVE	1	3549	59	0.112445
Figure_5e			Log2		MTL-AMUSR	Single_Cell_Data	YEASTRACT_2019	Tchourine_2018	NLIMUREA	1	992	59	0.120437
Figure_5e			Log2		MTL-AMUSR	Single_Cell_Data	YEASTRACT_2019	Tchourine_2018	NLIMNH4	1	1111	59	0.131715
Figure_5e			Log2		MTL-AMUSR	Single_Cell_Data	YEASTRACT_2019	Tchourine_2018	MMD	1	1894	59	0.171645
Figure_5e			Log2		MTL-AMUSR	Single_Cell_Data	YEASTRACT_2019	Tchourine_2018	NLIMPRO	1	853	59	0.0961746
Figure_5e			Log2		MTL-AMUSR	Single_Cell_Data	YEASTRACT_2019	Tchourine_2018	ALL	1	38225	59	0.229896
Figure_5e			Log2		MTL-AMUSR	Single_Cell_Data	YEASTRACT_2019	Tchourine_2018	YPEtOH	1	1427	60	0.140314
Figure_5e			Log2		MTL-AMUSR	Single_Cell_Data	YEASTRACT_2019	Tchourine_2018	RAPA	1	11805	60	0.141486
Figure_5e			Log2		MTL-AMUSR	Single_Cell_Data	YEASTRACT_2019	Tchourine_2018	CSTARVE	1	3549	60	0.124259
Figure_5e			Log2		MTL-AMUSR	Single_Cell_Data	YEASTRACT_2019	Tchourine_2018	MMEtOH	1	581	60	0.131767
Figure_5e			Log2		MTL-AMUSR	Single_Cell_Data	YEASTRACT_2019	Tchourine_2018	DIAUXY	1	3332	60	0.130745
Figure_5e			Log2		MTL-AMUSR	Single_Cell_Data	YEASTRACT_2019	Tchourine_2018	YPD	1	11037	60	0.133919
Figure_5e			Log2		MTL-AMUSR	Single_Cell_Data	YEASTRACT_2019	Tchourine_2018	NLIMGLN	1	1644	60	0.166477
Figure_5e			Log2		MTL-AMUSR	Single_Cell_Data	YEASTRACT_2019	Tchourine_2018	NLIMUREA	1	992	60	0.134117
Figure_5e			Log2		MTL-AMUSR	Single_Cell_Data	YEASTRACT_2019	Tchourine_2018	MMD	1	1894	60	0.180495
Figure_5e			Log2		MTL-AMUSR	Single_Cell_Data	YEASTRACT_2019	Tchourine_2018	NLIMNH4	1	1111	60	0.1216
Figure_5e			Log2		MTL-AMUSR	Single_Cell_Data	YEASTRACT_2019	Tchourine_2018	NLIMPRO	1	853	60	0.115574
Figure_5e			Log2		MTL-AMUSR	Single_Cell_Data	YEASTRACT_2019	Tchourine_2018	ALL	1	38225	60	0.251368
Figure_5e			Log2		MTL-AMUSR	Single_Cell_Data	YEASTRACT_2019	Tchourine_2018	NLIMGLN	1	1644	61	0.141573
Figure_5e			Log2		MTL-AMUSR	Single_Cell_Data	YEASTRACT_2019	Tchourine_2018	YPD	1	11037	61	0.139301
Figure_5e			Log2		MTL-AMUSR	Single_Cell_Data	YEASTRACT_2019	Tchourine_2018	MMD	1	1894	61	0.17131
Figure_5e			Log2		MTL-AMUSR	Single_Cell_Data	YEASTRACT_2019	Tchourine_2018	RAPA	1	11805	61	0.128107
Figure_5e			Log2		MTL-AMUSR	Single_Cell_Data	YEASTRACT_2019	Tchourine_2018	NLIMUREA	1	992	61	0.117444
Figure_5e			Log2		MTL-AMUSR	Single_Cell_Data	YEASTRACT_2019	Tchourine_2018	YPEtOH	1	1427	61	0.123633
Figure_5e			Log2		MTL-AMUSR	Single_Cell_Data	YEASTRACT_2019	Tchourine_2018	CSTARVE	1	3549	61	0.104794
Figure_5e			Log2		MTL-AMUSR	Single_Cell_Data	YEASTRACT_2019	Tchourine_2018	DIAUXY	1	3332	61	0.11624
Figure_5e			Log2		MTL-AMUSR	Single_Cell_Data	YEASTRACT_2019	Tchourine_2018	NLIMPRO	1	853	61	0.0908479
Figure_5e			Log2		MTL-AMUSR	Single_Cell_Data	YEASTRACT_2019	Tchourine_2018	NLIMNH4	1	1111	61	0.128967
Figure_5e			Log2		MTL-AMUSR	Single_Cell_Data	YEASTRACT_2019	Tchourine_2018	MMEtOH	1	581	61	0.111844
Figure_5e			Log2		MTL-AMUSR	Single_Cell_Data	YEASTRACT_2019	Tchourine_2018	ALL	1	38225	61	0.233237
